# Supplementary material for: The association between a free medicine program and functioning in people with schizophrenia: a cross-sectional study in Liuyang, China
Source: PeerJ. 2020 Apr 24;8:e8929. doi: 10.7717/peerj.8929 (PMC7185026; doi:10.7717/peerj.8929)
Supplement: Supplemental Information 1 [file peerj-08-8929-s001.xls]

## Sheet: Sheet1
men	age	dx	N5	yonset	ydiagnosis	nation	han	edu	marry	marry1	firstmarry	spousehealth	spousehukou	caretaker	job	quit	yquit	ipt	nipt	hyear1	htimes1	hyear2	htimes2	hyear3	htimes3	hyear4	htimes4	hyear5	htimes5	hyear6	htimes6	suicide	nsuicide	syear1	stimes1	syear2	stimes2	syear3	stimes3	syear4	stimes4	syear5	stimes5	syear6	stimes6	wonder	nwonder	lyear1	ltimes1
female	49	SCH	yes	1990	1996	1	Han	middle school	married/remarried	1	yes	healthy	in liuyang	name	farmer	yes	1990	no														No														no
male	36	epileptic disorder	no	1992	1994	1	Han	primary school and below	never married					name	farmer	yes	1994	no														No														no
male	30	SCH	yes	1994	1994	1	Han	primary school and below	never married					name	farmer	yes	1994	no														No														yes	3	2005	3
female	43	SCH	yes	2002	2005	1	Han	primary school and below	married/remarried	2	no	disabled	in liuyang	name	farmer	yes	2005	no														No														yes	1	2008	1
female	35	SCH	yes	1993	1994	1	Han	middle school	married/remarried	1	yes	healthy	in liuyang	name	farmer	yes	1994	yes	1	2005	1											Yes	1	2005	1											no
female	46	SCH	yes	1996	2007	1	Han	primary school and below	married/remarried	2	no	healthy	in liuyang	name	farmer	yes	2005	no														No														yes	6	2005	1
male	52	SCH	yes	2005	2005	1	Han	middle school	married/remarried	2	no	healthy		name	farmer	no		yes	1	2005	1											No														yes	5	2005	5
male	27	SCH	yes	2005	2005	1	Han	middle school	never married					parents	farmer	yes	2005	yes	6	2005	1	2007	2	2008	3							No														yes	8	2007	2
male	45	SCH	yes	2006	2006	1	Han	primary school and below	never married					name	farmer	yes	2006	yes	1	2006	1											No														yes	1	2006	1
male	35	SCH	yes	2003	2004	1	Han	high school	never married					parents	farmer	yes	2011	yes	2	2006	1	2009	1									Yes	1	2005	1											yes	1	2005	1
female	26	affective disorder	no	2004	2004	1	Han	middle school	married/remarried	1	yes	healthy	in liuyang		student	no	2008	no														No														no
female	46	SCH	yes	1989	1989	1	Han	primary school and below	married/remarried		yes	healthy	in liuyang	spouse	farmer	no		yes	1	2011	1											Yes	1	2011	1											yes	1	2011	1
female	48	SCH	yes	1985	1985	1	Han	middle school	married/remarried		yes	healthy	in liuyang	spouse	farmer			no														No														yes	2	2010	1
female	87	other disorder	no	2011	2011	1	Han	primary school and below	widowed		yes		in liuyang	children	farmer	no		yes	1	2011	1											No														no
female	41	SCH	yes	1980	1981	1	Han	primary school and below	married/remarried	1	yes	healthy	in liuyang	spouse	farmer	no		no														No														no
female	32	SCH	yes	1995	1995	1	Han	primary school and below	married/remarried		yes	healthy	in liuyang	spouse	farmer	no		no														No														no
male	59	SCH	yes	2008	2008	1	Han	primary school and below			yes	healthy	in liuyang	spouse	farmer	no		no														No														no
female	44	epileptic disorder	no	1980	1982	1	Han	primary school and below	married/remarried	1	yes	healthy	in liuyang	spouse	farmer	no		yes	2	2010	1	2011	1									No														no
male	30	SCH	yes	2002	2002	1	Han		never married					parents	farmer	no		yes	2	2002	1	2005	1									No														no
male	65	SCH	yes	1987	1987	1	Han	primary school and below	married/remarried		yes	healthy	in liuyang	spouse	farmer	yes		yes	1	1987	1											No														yes		1988	1
female	34	affective disorder		2005	2005	1	Han	high school	never married					parents	farmer	yes	2009	no														No														no
male	38	SCH		1986	1990	1	Han	middle school	married/remarried		yes	healthy	in liuyang	spouse	farmer	no		yes	1	1990	1											No														no
female	29	SCH	yes	2003	2003	1	Han		never married				in liuyang	parents	farmer	yes	2003	yes	1	2003	1											No														no
female	29	SCH	yes	2008	2008	1	Han	middle school	married/remarried	1	yes	healthy	in liuyang	spouse		no		no														No														no
female	37	SCH	yes	2008	2008	1	Han	primary school and below	married/remarried	1	yes	healthy	in liuyang	spouse	farmer	no		yes	1	2008	1											No														no
female	28	other disorder	no			1	Han	middle school	married/remarried		yes	healthy	in liuyang	self	nonfarmer	no		no														No														no
male	40	SCH	yes	1992	1992	1	Han	primary school and below	never married						farmer																	No														no
female	70	SCH	yes	1986	1986	1	Han	primary school and below	married/remarried			disabled	in liuyang	spouse	farmer	yes		yes	1	2010	1											No														no
female	44	SCH	yes	1996	1996	1	Han	primary school and below	widowed					name	farmer	no		no														No														no
male	46	SCH	yes	2002	2002	1	Han	middle school	married/remarried	1	yes	healthy	in liuyang	spouse	farmer	no		no														No														no
	20	affective disorder	no	2011	2011	1	Han	junior college	never married						nonfarmer	no		yes	5	2011	5											No														no
female	26	SCH	yes	2004		1	Han	middle school	married/remarried		no	healthy	in liuyang		farmer	no		yes	1	2004	1											No														no
female	37	SCH	yes	1999	1999	1	Han	middle school	married/remarried		yes	healthy	in liuyang	spouse	farmer	no		no														No														no
male	41	SCH	yes	1996	1996	1	Han	high school	married/remarried		yes	healthy	in liuyang	parents	farmer	no		no														No														no
female	37	SCH	yes	1985	1985	1	Han	middle school	married/remarried	0	yes	healthy	in liuyang	name	farmer	no																No														no
female	58	SCH	yes	1990	1990	1	Han	middle school	married/remarried		yes	disabled	in liuyang	spouse	farmer	no		yes	2	2002	1	2011	1									No														yes	2	1998	1
male	42	SCH	yes	1993	1993	1	Han	primary school and below	never married					parents	farmer	no		yes	1	2005	1											No														no
female	63	suspected SCH		1984	1984	1	Han	middle school	married/remarried		no	healthy	in liuyang	spouse	farmer	no		no														No														no
male	30	SCH	yes	2006	2007	1	Han	primary school and below	never married					siblings	farmer	no		yes	1	2006	1											No														no
male	53	suspected SCH		1993	1995	1	Han		never married					siblings	farmer			no														No														no
female	46	suspected SCH		1995	2000	1	Han	primary school and below	married/remarried		yes	healthy	in liuyang	spouse	farmer			no														No														no
male	47	suspected SCH		1990		1	Han	primary school and below	never married					parents	farmer			no														No														no
male	41	suspected SCH		1995		1	Han	primary school and below	never married					siblings	farmer			no														No														yes	100
female	58	suspected SCH	no	1998		1	Han	primary school and below	married/remarried		yes	healthy	in liuyang	spouse	farmer			no														No														no
female	61			2001	2001	1	Han	primary school and below	married/remarried	1	yes	healthy	in liuyang	spouse	farmer	yes	2002	yes	2	2001	1	2002	1									No														yes	2	2001	1
male	50	SCH		2008	2008	1	Han		divorced					parents	farmer	yes	2009	yes	1	2008	1											No														no
male	58	SCH		1996	1996	1	Han	primary school and below	married/remarried		yes	healthy	in liuyang	spouse	farmer	yes	1992	yes	1	1996	1											No														no
female	29	SCH		1988	1988	1	Han	primary school and below	never married					parents	farmer	yes	1988	yes	2	1988	1	2008	1									No														yes	6	1988	1
male	37	SCH		2011	2011	1	Han	middle school	never married					parents	farmer	no		yes	2	2011	2											No														no
male	25	SCH		2007	2007	1	Han	middle school	never married					relatives	farmer	yes	2007	yes	3	2007	1	2010	1	2011	1							No														no
male	31	SCH		2001	2001	1	Han	middle school	never married					siblings	farmer	yes	2001	yes	1	2001	1											No														no
male	48	SCH		2004	2004	1	Han	middle school	married/remarried		yes	healthy	in liuyang	self	farmer	no		yes	1	2003	1											No														no
male	58	SCH		1998	1998	1	Han	primary school and below	never married					self	farmer	yes	1998	no														No														no
male	23	SCH		2009	2009	1	Han	high school	never married					self	farmer	no		no														No														no
female	25	paranoid disorder		2011	2012	1	Han	middle school	married/remarried		yes	healthy	in liuyang	spouse	farmer	yes	2012	yes	1	2012	1											Yes	1	2012	1											no
female	21	other disorder	yes	2007	2007	1	Han	middle school	never married					parents	farmer	no		yes	3	2008	1	2009	1	2011	1							No														no
	41	SCH	yes	2005	2005	1	Han	primary school and below	never married					relatives		yes	2009	no														No														no
male	57	SCH	yes	1985	1985	1	Han	primary school and below	never married					siblings	farmer	no		no														No														no
female	36	other disorder	yes	2001	2001	1	Han	high school	married/remarried		yes	healthy	in liuyang	spouse	farmer	no		no														No														no
female	38	SCH	yes	2005	2005	1	Han	primary school and below	married/remarried		yes	healthy	in liuyang	spouse	farmer	no		no														No														yes	4	2005	3
female	35	SCH	yes	1992	1992	1	Han	middle school	married/remarried		yes	healthy	in liuyang	spouse	farmer			yes	3	2005	1	1996	1	2000	1							No														no
male	56	SCH	yes	1989	2006	1	Han	primary school and below	married/remarried		yes	healthy	in liuyang	spouse	farmer	no		yes	3	2010	1	2011	1	2012	1							No														no
male	37	SCH	yes	1991	1995	1	Han	middle school	never married					parents	farmer	no		yes	2	1991	1	2008	1									No														no
female	48	SCH	yes	1980	2006	1	Han	primary school and below	married/remarried		yes	healthy	in liuyang	spouse	farmer	no		no														No														no
male	28	SCH	yes	2003	2003	1	Han	high school	never married					parents	farmer	no		yes														No														no
female	30	SCH		1990	1990	1	Han	middle school	married/remarried		yes	healthy	in liuyang	parents	farmer			yes	2	1990	1	2010	1									No														no
female	37	SCH		1992	1995	1	Han	primary school and below	married/remarried		yes	healthy	in liuyang	spouse	farmer	no		yes	3	2005	1	2006	1	2008	1							Yes	3	2005	1	2006	1	2008	1							no
female	64	SCH		1966	1966	1	Han	primary school and below	married/remarried		yes	healthy		name	farmer	no		yes	4	1965	1	1972	1	1999	1	2011	1					No														yes	4	1965	1
female	60	SCH		2002	2011	1	Han	primary school and below	married/remarried		yes	healthy	in liuyang	children	farmer	yes		no														No														yes	6	2009	2
female	37	SCH		1984		1	Han	middle school	never married					parents	farmer			yes	3	1984	1	1992	1	2000	1							No														yes	7	1984	3
female	58	epileptic disorder		1979	2007	1	Han	primary school and below	married/remarried		yes	healthy		name	farmer	no		yes	5	2007	1	2005	1	2004	1	2003	1					No														no
female	72	affective disorder		1980	2006	1	Han	primary school and below	married/remarried		yes	healthy	in liuyang	name	farmer	no		no														No														no
male	50	SCH		1982	1985	1	Han	middle school	married/remarried		yes	healthy	in liuyang	self	farmer	no		yes	2	1992	1	1987	1									Yes	1	1992	1											no
female	42	SCH		1989	1990	1	Han	primary school and below	married/remarried		yes	healthy	in liuyang	spouse	farmer	no		yes	3	1990	1	2004	1	2008	1							No														no
female	35	epileptic disorder		1991	1991	1	Han	middle school	married/remarried		yes	healthy	in liuyang	spouse		yes	2001	yes	1	2002	1											No														no
male	58	SCH		1982	1982	1	Han	primary school and below	widowed					name	farmer			yes	4	2010	1	1972	2	1985	1							No														yes	10	1972	3
female	34	SCH		2005	2005	1	Han	primary school and below	married/remarried		yes	healthy	in liuyang	spouse	farmer	no		yes	1	2006	1											Yes	1	2006	1											yes	2	2006	2
female	66	SCH		1977	1981	1	Han	primary school and below	married/remarried		yes	healthy	in liuyang	spouse	farmer	yes	1977	yes	3	1981	1	1991	1	2009	1							Yes	2	1977	2											yes	4	1977	2
female	58	epileptic disorder		1972	2005	1	Han	primary school and below	married/remarried		yes	healthy	in liuyang	spouse	farmer	no		no														No														no
female	65	SCH		1964	1966	1	Han		married/remarried		yes	healthy	in liuyang	spouse	nonfarmer			yes	5	1965	1	1973	1	1992	1	2010	2					No														yes	2	1973	1
female	47	SCH		1992	1992	1	Han	middle school	widowed					children	nonfarmer			yes	1	1993	1											No														no
female	24	SCH		2008	2008	1	Han	high school	never married					name	farmer			yes	1	2008	1											No														no
female	34	SCH		2009	2009	1	Han	middle school	married/remarried		yes	healthy	in liuyang	spouse	farmer	no		yes	2	2009	2											No														no
male	41	SCH				1	Han	primary school and below	never married					parents	farmer	no		no														Yes	1	2008	1											no
female	36	epileptic disorder		1999	1999	1	Han	middle school	married/remarried		yes	healthy	in liuyang	spouse	nonfarmer			yes	1	1999	1											No														no
female	29	SCH		2007	2007	1	Han	primary school and below	married/remarried		yes	healthy	in liuyang	spouse	farmer	no		yes	2	2000	1	2002	1									No														no
female	55	SCH	yes	1988	1988	1	Han	primary school and below	married/remarried	1	yes	healthy	in liuyang	spouse	farmer	yes	2008	no														No														no
female	32	other disorder		1991	1991	1	Han	primary school and below	never married					siblings	farmer	no		no														No														no
female	36	SCH	yes	1998	2000	1	Han	middle school	married/remarried			healthy		spouse	farmer	no		no														No														no
male	56	suspected SCH		1976	1976	1	Han	primary school and below	never married					name	farmer	yes	1976	yes	2	1976	1	1981	1									No														no
male	48	SCH	yes	1998	2000	1	Han	middle school	married/remarried	1	yes	healthy	in liuyang	name	farmer	no		yes	3	1998	1	2003	2	2011	1							No														no
male	17	SCH	yes	2008	2009	1	Han	middle school	never married					name		yes	2008	yes	6	2008	1	2010	2	2011	3							No														no
female	30	affective disorder	no	2011	2011	1	Han	middle school	married/remarried	1	yes	healthy	in liuyang	parents	farmer	no		yes	1	2011	1											No														no
male	23	SCH	yes	2008	2008	1	Han	middle school	never married					parents	farmer	no		yes	1	2008	1											No														no
male	28	suspected SCH		2002	2003	1	Han	middle school	never married					parents	farmer	no		yes	3	2002	1	2007	2									No														no
female	31	affective disorder		1992	1992	1	Han	primary school and below	divorced					name				yes	10	1992	1	1995	2	2005	3	2011	4					No														no
female	40	suspected SCH		2001	2002	1	Han		never married					parents		no		yes	6	2001	1	2003	1	2005	1	2007	1	2009	1	2010	1	No														no
female	49	epileptic disorder		1976	1978	1	Han	middle school	married/remarried	1	yes	healthy		spouse	farmer	no		yes	5	1978	1	2009	2	2011	3							No	0													no	0
female	70	affective disorder		2006	2007	1	Han							children	farmer	no		yes	4	2006	1	2007	1	2008	1	2011	1					No														no
female	38	SCH	yes	2004	2004	1	Han	middle school	married/remarried	1	yes	healthy	in liuyang	spouse	farmer	no		yes	2	2004	3	2005	2									Yes	1	2004	5											yes	2	2004	3
female	24	SCH	yes	2000	2000	1	Han	middle school	never married					parents	farmer	yes	2000	yes	4	2000	2	2001	2									No														yes	3	2000	1
male	49	SCH	yes	2002	2002	1	Han	high school	married/remarried	1	yes	healthy	in liuyang	spouse	farmer	no		yes	1	2003	9											No														yes	4	2003	2
male	53	SCH	yes	2004	2004	1	Han	middle school	married/remarried	1	yes	healthy	in liuyang	spouse	farmer	no		yes	1	2004	1											Yes	2	2004	2											yes	2	2004	2
female	25	SCH	yes	1989	1990	1	Han	primary school and below	married/remarried	1	yes	healthy	in liuyang	spouse	farmer	yes	1990	no														No														no
female	35	SCH	yes	2001	2001	1	Han	middle school	married/remarried	1	yes	healthy	in liuyang	spouse	farmer	no		no														No														no
female	42	SCH	yes	1998	1998	1	Han	middle school	divorced					parents	farmer	no		no														No														no
male	22	SCH	yes	2004	2004	1	Han	middle school	never married					parents	farmer			yes	2	2004	1	2005	1									No														no
male	40	SCH	yes	2000	2000	1	Han	primary school and below	never married					parents	farmer	no		yes	1	2000	1											No														no
male	42	SCH	yes	1993	1994	1	Han	middle school	never married					parents	farmer			no														No														no
female	29	SCH	yes	2001	2001	1	Han	primary school and below	never married						farmer	yes	2001	yes	2	2001	1	2003	1									No														no
female	42	SCH	yes	1995	1995	1	Han	primary school and below	married/remarried		no	healthy	in liuyang	spouse	farmer	yes	1996	yes	1	1995	1											No														no
male	43	SCH	yes	2004	2004	1	Han	junior college	married/remarried		no	healthy	in liuyang	spouse	nonfarmer	yes	2005	no														Yes	4	2004	1	2007	1	2005	1	2009	1					no
female	48	SCH	yes	1990	1990	1	Han	primary school and below	married/remarried		no	healthy	in liuyang		farmer	no		yes	2	1990	1	1992	1									No														no
female	39	SCH	yes	1993	1995	1	Han	primary school and below	divorced					parents	farmer	yes		yes	2	1995	1	1997	1									No														no
female	36	SCH	yes	2008	2008	1	Han	middle school	married/remarried		yes	healthy	in liuyang	name	farmer	yes	2008	yes	1	2008	1											No														no
female	65	epileptic disorder	no	1966	1966	1	Han	primary school and below	married/remarried	1	yes	healthy	in liuyang	spouse	farmer			yes	2	2011	2											No														no
female	50	SCH	yes	1985	1985	1	Han	high school	married/remarried	1	yes	healthy	in liuyang	spouse	farmer			no														No														no
female	30	affective disorder	no	1993	1993	1	Han	middle school	married/remarried	1	yes	disabled	in liuyang	parents	farmer			yes	2	1993	1	2002	1									Yes	3	1993	3											no
male	30	suspected SCH		1987	1987	1	Han	primary school and below	never married					name	farmer			yes	4	2000	1	2003	1	2005	1	2001	1					No														yes	10
female	27	SCH	yes	1984	2006	1	Han	primary school and below	never married					parents				yes	2	2009	1	2011										No														yes	2	2000	1
female	55	SCH	yes	1982	1982	1	Han	primary school and below	married/remarried	1	yes	healthy	in liuyang	spouse	farmer			yes														Yes	1	1986	1	1992	1									yes	2	1995	1
female	58	SCH	yes	1986	1986	1	Han	primary school and below	married/remarried	1	yes	healthy	in liuyang	spouse	farmer	yes	1999	yes	3	1987	1	2010	1	2011	1							Yes	1	1987	1											yes	1	1988	1
male	34	SCH	yes	1998	1998	1	Han	middle school	never married					parents	farmer	yes	2008	yes	3	1998	1	1999	1	2012	1							No														no
female	82	SCH	yes	1976	1976	1	Han		married/remarried	2	no	healthy	in liuyang	spouse	nonfarmer	yes	2002	yes	2	2004	1	2005	1									No														no
male	29	SCH	yes	2004	2006	1	Han	high school	never married					spouse	nonfarmer	no		yes	1	2006	1											No														no
female	45	SCH	yes	2008	2010	1	Han	primary school and below	married/remarried	1	yes	healthy	in liuyang	spouse	farmer	no		yes	2	2010	1	2011	1									No														yes	2	2010	2
male	55	SCH	yes	1992	1992	1	Han	high school	married/remarried	1	yes	healthy	in liuyang	spouse	farmer	no		yes	5	1992	1	1993	1	2001	1	2004	1	2007	1			No														no
male	42	SCH	yes	1992	1992	1	Han	primary school and below	never married					siblings	farmer	no		no														No														no
female	69	SCH	yes	2005	2006	1	Han	primary school and below	married/remarried	1	yes	healthy	in liuyang	spouse		no		yes	4	2006	1	2008	2	2010	1							No														yes	6	2011	3
male	30	epileptic disorder	no	2006	2006	1	Han		married/remarried	1	yes	healthy	in liuyang	spouse	farmer	no		no														No														no
female	30	SCH	yes	1995	1995	1	Han	middle school	married/remarried	1	yes	healthy	in liuyang	spouse	farmer	no		no														No														no
female	50	SCH	yes	1980	1980	1	Han	middle school	married/remarried	1	yes	healthy	in liuyang	spouse	farmer			yes	2	1984	1	1998	1									No														no
male	38			2007	2007	1	Han	middle school	divorced						farmer	no		no														No														no
female	37				1995	1	Han	primary school and below	married/remarried	1	yes	healthy	in liuyang	spouse	farmer	no		no														No														no
female	38	suspected SCH	yes	1990	1991	1	Han	primary school and below	married/remarried		yes	healthy	in liuyang	spouse	farmer	no		yes	1	1995	1											No														no
female	48			2010	2010	1	Han	middle school	married/remarried	1	yes	healthy	in liuyang	parents	farmer	no		yes	2	2010	1	2011	1									No														no
female	61					1	Han	primary school and below	married/remarried	1	yes	healthy	in liuyang			no		no														No														no
male	56			1984	1985	1	Han	middle school	divorced						farmer	no	2000	yes	2	1990	1	2011	1									No														yes	2	1990	1
female	56	SCH	yes	2001	2002	1	Han	primary school and below	married/remarried	1	yes	healthy	in liuyang	spouse	farmer			no														No														no
male	64	epileptic disorder	no			1	Han	middle school	married/remarried	1	yes	disabled	in liuyang	spouse	farmer			yes	1	2011	1											No														no
female	60	SCH	yes	1981	1982	1	Han	primary school and below	married/remarried	1	yes	healthy	in liuyang	spouse	farmer			no														No														no
female	47	SCH	yes			1	Han	primary school and below	married/remarried	1	yes	healthy	in liuyang	spouse	farmer
female	61	SCH	yes			1	Han	primary school and below	married/remarried	1	yes	healthy	in liuyang	spouse	farmer			no														No														no
male	46	SCH	yes	2001	2001	1	Han	primary school and below	never married					parents				no														No														no
female	32	affective disorder	no			1	Han	middle school	never married					parents	farmer			no														No														no
male	68	epileptic disorder	no	1987	1987	1	Han	primary school and below	married/remarried	1	yes	healthy	in liuyang	spouse	farmer			no														No														no
female	36	SCH	yes	1996	1996	1	Han	middle school	never married					parents	farmer	yes	1996	no														No														no
male	33	SCH	yes	1998	1999	1	Han	primary school and below	never married					siblings	farmer			no														No														no
male	42	SCH	yes	2006	2007	1	Han	middle school	married/remarried	1	yes	healthy	in liuyang	spouse	farmer	no		no														No														no
female	39	SCH	yes	2006	2006	1	Han	primary school and below	married/remarried			disabled	in liuyang	name				yes	3	2006	1	2007	1	2008	1							No														no
male	60	epileptic disorder	no	1982	1982	1	Han	primary school and below	never married					siblings				no														No														no
female	62	SCH	yes			1	Han	middle school	married/remarried	1	yes	healthy	in liuyang	spouse	farmer			no														No														no
male	49	SCH	yes	1988	2001	1	Han	high school	married/remarried	2	no	healthy	in liuyang	spouse	nonfarmer	yes	2001	yes	2	2001	1	2002	1									Yes	1	2002	1											no
male	59	affective disorder	no	1989	1990	1	Han	middle school	married/remarried	1	yes	healthy	in liuyang	spouse		yes	1989	yes	3	1992	1	1998	1	2003	1							No														yes
male	5	SCH	yes	1980	1982	1	Han	middle school	divorced					siblings	farmer	yes	1991	no														No
male	38	SCH	yes	2000	2001	1	Han	middle school	married/remarried	1	yes	healthy	in liuyang	parents	farmer	no		yes	2	2001	2											No														no
female	61	SCH	yes	1991	1995	1	Han	primary school and below	married/remarried	1	yes	healthy	in liuyang	spouse	nonfarmer	yes	2002	yes	10	2009	1	2008	1	2007	1							No														no
male	61	SCH	yes	2000	2001	1	Han	middle school	married/remarried	1	yes	healthy	in liuyang	spouse	farmer			yes	2	2001	1	2003	1									No														no
male	53	SCH	yes	2005	2006	1	Han	middle school	married/remarried	1	yes	healthy	in liuyang	spouse	farmer			no														No														no
male	5	SCH	yes	1990	1990	1	Han	middle school	married/remarried	1	yes	disabled		self	farmer	no		yes	2	1990	1	2012	1									No														no
female	56	epileptic disorder	no	1989	1989	1	Han	primary school and below	married/remarried	1	yes	healthy	in liuyang	spouse	farmer	no		no														No														no
female	45	SCH	yes	1986	1986	1	Han	middle school	married/remarried	1	yes	disabled	in liuyang	self	farmer	no		no														No														no
female	37	SCH	yes	2003	2008	2	Han	high school	married/remarried		yes	healthy	in liuyang	spouse	nonfarmer	yes	2008	yes	1	2008	1											No														no
female	69	other disorder	no	2003	2005	1	Han	primary school and below	married/remarried	1	yes	healthy	in liuyang	children	farmer			no														No														no
male	25	SCH	yes	2007	2007	1	Han	high school	married/remarried	1	yes	healthy	in liuyang	name	farmer	no		yes	1	2007	1											No														no
male	46	SCH	yes	1995	1996	1	Han		never married					siblings				yes	2	1996	2											No														no
male	52	SCH	yes	1993	1995	1	Han	middle school	married/remarried	1	yes	healthy	in liuyang	spouse				yes	2	1998	1	2002	1									No														no
female	61	SCH	yes	2009	2010	1	Han		married/remarried	1	yes	healthy	in liuyang	spouse				no														No														no
female	25	SCH	yes	2009	2009	1	Han	middle school	married/remarried	1	yes	healthy	in liuyang	spouse				no														No														no
female	60	SCH	yes	1984	1986	1	Han	middle school	married/remarried	1	yes	healthy	in liuyang	spouse	farmer			yes	4	1982	1	1999	1	2000	1	2003	1					No														no
female	80	affective disorder		2004	2006	1	Han	primary school and below	widowed					children	nonfarmer	no		yes	1	2006	1											No														no
male	66	SCH	yes	1999	2000	1	Han	middle school	widowed					parents	farmer	no		yes	2	2000	1	2002	1									No														no
male	76	SCH	yes	1966	2006	1	Han	high school	widowed					children	nonfarmer	yes	1966	yes	5	2012	1	2011	1	2009	1	2008	1	2007	1			No														no
female	50	SCH	yes	1999	1999	1	Han	high school	married/remarried	1	yes	healthy	in liuyang	spouse		no		yes	1	1999	1											No														no
male	39	SCH	yes	2001	2001	1	Han	high school	married/remarried	1	yes	healthy	in liuyang	spouse	farmer	no		yes	2	2001	1	2003	1									No														no
male	52	SCH	yes	1985	1985	1	Han	high school	never married					parents	nonfarmer	yes	1984	yes	6	2008	2											No														yes	6	2009	1
female	63	SCH	yes	1975	1975	1	Han	primary school and below	married/remarried	1	yes	healthy		children	farmer	no		no														No														no
male	48	SCH	yes	1992	1993	1	Han		never married					parents				yes	2	1993	2											No														no
female	50	SCH	yes	1997	1997	1	Han	primary school and below	married/remarried	1	yes	healthy	in liuyang	name				yes	2	1998	1	2006	1									No														no
male	48	SCH	yes	2008	2009	1	Han	middle school	married/remarried	1	yes	healthy	in hunan	spouse	farmer			yes	3	2010	1	2011	2									No														no
male	30	SCH	yes	2004	2006	1	Han	middle school	never married					relatives	nonfarmer	yes	2006	yes	5	2006	1	2008	1	2009	1	2010	1					No														no
female	29	SCH	yes	2008	2008	1	Han	middle school	married/remarried	1	yes	healthy	in liuyang	spouse	farmer	no		yes	1	2008	1											No														no
female	73	SCH	yes	1988	1989	1	Han		widowed					children				no														No														no
male	41	SCH	yes	1985	1986	1	Han	middle school	divorced					children	farmer			no														No														no
female	43	SCH	yes	2005	2005	1	Han	high school	married/remarried	1	yes	healthy	in liuyang	spouse	nonfarmer	yes		no														No														no
male	32	SCH	yes	2000	2007	1	Han	high school	married/remarried	1	yes	healthy	in liuyang		nonfarmer	yes	2007	yes	3	2007	2	2008	1									No														no
female	47	SCH	yes	1995	1995	1	Han	middle school	married/remarried	1	no	healthy	outside hunan	spouse	nonfarmer	no		yes	3	1995	1	1998	1	2001	1							No														no
female	36	SCH	yes	2000	2004	1	Han	high school	married/remarried	2	no	healthy	in liuyang	spouse	nonfarmer	yes	2004	yes														Yes														no
female	37	SCH	yes	2006	2007	1	Han		married/remarried	1	yes	healthy	in liuyang	spouse	nonfarmer	no		no														No														no
female	58	SCH	yes	1960	1961	1	Han	primary school and below	never married					parents				yes	1	1972	1											No														no
male	33	SCH	yes	1993	1993	1	Han	middle school	married/remarried	1	yes	healthy	in liuyang	parents	nonfarmer	yes	1993	yes	12	2005	4	2006	3	2007	4	2008	1					Yes	9	1994	2	2005	2	2006	3	2007	2					yes	1	2006	1
male	49	SCH	yes	1997	1997	1	Han	high school	married/remarried		yes	healthy	in liuyang	spouse	nonfarmer	yes	1997	yes	3	2011	1	1999	1	1997	1							No														no
female	40	affective disorder		1996	1996	1	Han	middle school	divorced					parents	nonfarmer	yes	2002	yes	3	2005	1	2006	1	1996	1							No														yes	10	2012	10
female	71	SCH	yes	2007	2008	1	Han	primary school and below	widowed					children		no		yes														No														no
female	39	SCH	yes	2009	2009	1	Han	middle school	divorced						nonfarmer	yes	2009	no														No														no
male	34	SCH	yes	2004	2004	1	Han	high school																																						yes
male	45	SCH	yes	1997	2010	1	Han	high school	married/remarried	1	yes	healthy	in liuyang	spouse	farmer	no		yes														No														no
male	29	SCH	yes	2002	2002	1	Han	primary school and below						parents	nonfarmer	yes	2002	yes	3	2002	1	2003	1	2010	1							No														no
male	26	SCH	yes	2005	2005	1	Han	high school	never married					parents				yes	2	2006	1	2009	1									No														no
male	50	suspected SCH	yes	2000		1	Han	middle school	married/remarried		yes	healthy	in liuyang		farmer	yes		yes	3																											yes	30
female	32	suspected SCH	yes			1	Han	middle school	married/remarried		yes	healthy	in liuyang	name	farmer	no
female	34	SCH	yes	2002	2002	1	Han	primary school and below	married/remarried	1	yes	healthy	in liuyang	spouse	farmer			no														No														no
female	43	SCH	yes	1990		1	Han	middle school	married/remarried		yes	healthy	in liuyang	name	farmer	yes	1990
female	41					1	Han
female	34			2002	2002	1	Han	primary school and below	married/remarried		yes	healthy	in liuyang		farmer
male	32	suspected SCH				1	Han
female	38	SCH	yes	1995	1996	1	Han	middle school	married/remarried		yes	healthy	in liuyang	spouse	farmer			yes	1	2008	1
male	35	SCH	yes	2008		1	Han									yes	2008
female	41	suspected SCH	yes			1	Han	middle school	married/remarried		yes	healthy	in liuyang	spouse	farmer
female	50	suspected SCH	yes	1995	1996	1	Han	primary school and below	married/remarried		yes	healthy	in liuyang	spouse	farmer	yes	1996
female	41	SCH	yes	1970		1	Han	primary school and below	married/remarried		yes	healthy	in liuyang	spouse	farmer	yes	2000	yes	30
female	22	SCH	yes	2010		1	Han	middle school	married/remarried	1	yes	healthy	in liuyang	spouse	farmer			yes	1	2010	1											No														no	0
female	63	SCH	yes	1978	1978	1	Han	primary school and below	married/remarried		yes	healthy	in liuyang	spouse	farmer			no														No														no
male	26	suspected SCH	yes			1	Han
male	33	SCH				1	Han	middle school	never married					parents	farmer			no														No														no
male	31	SCH	yes	2004	2004	1	Han	high school	never married					parents	farmer	no		yes	2	2010	2											No														no
female	61	SCH	yes	2006	2006	1	Han	primary school and below	married/remarried		yes	healthy	in liuyang	spouse	farmer	no		no														No														no
	36	SCH	yes	2002	2002	1	Han	primary school and below	married/remarried		yes	healthy	in liuyang	spouse	farmer	no		no														No														no
female	37	SCH	yes	2007	2007	1	Han	middle school	married/remarried	1	yes	healthy	in liuyang	spouse	farmer	no		no														No														no
female	26	SCH	yes	2004	2004	1	Han	middle school	married/remarried					parents	farmer	no		yes	1	2011	1											No														no
female	34	affective disorder	no	2010	2010	1	Han		married/remarried		yes	healthy	in liuyang	spouse	farmer	no		no														No														no
female	42	SCH	yes	1984	1984	1	Han	middle school	never married					parents	farmer	yes	2002	yes	1	2009	1											No														yes		2009	1
female	31	SCH	yes	2010	2010	1	Han	middle school	married/remarried		yes	healthy	in liuyang	spouse	farmer	no		no														No														no
male	42	SCH	yes	1994	1994	1	Han	middle school	never married					parents	farmer	no		no														No														yes	1	2011	1
male	30	SCH	yes	1996	1996	1	Han	middle school	never married					parents	farmer	no		no														No														yes	3	2010	1
male	50	SCH	yes	1991	1991	1	Han	primary school and below	married/remarried		yes	healthy	in liuyang	spouse	farmer	no		no														No														no
male	37	SCH	yes	1980	1980	1	Han	primary school and below	never married					parents	farmer	yes		no														No														no
female	84	SCH	yes	2007	2007	1	Han	primary school and below			yes	healthy	in liuyang		farmer	yes		no														No														no
female		SCH	yes	2001	2001	1	Han	primary school and below	married/remarried		yes	healthy	in liuyang	spouse	farmer	yes	2001	yes	1	2006	1											No														yes	30
female	38	SCH	yes	1992		1	Han	middle school			yes	healthy	in liuyang	spouse	farmer	yes	1992	yes	10													No														yes
female	24	SCH	yes	2005	2005	1	Han	high school			yes	healthy	in liuyang	parents	farmer	yes		yes	2													No														yes
male	26	SCH	yes	2000	2000	1	Han	primary school and below	never married					parents	farmer	yes	2000	no														No														no
female	29	epileptic disorder	yes	1995	2011	1	Han	middle school	married/remarried		yes	disabled	in liuyang		farmer	no		no														No														no
male	20	SCH	yes	2010	2011	1	Han	middle school	never married					name	farmer			yes	2	2011	2											No														no
male	21	SCH	yes	2010	2010	1	Han	middle school	never married					parents	farmer	no		yes	2	2010	1	2011	1									No														no
male	39	affective disorder	yes	1993	1996	1	Han	middle school	married/remarried		yes	disabled	in liuyang	spouse	farmer	no		yes	3	1994	1	2000	1	2005	1							No														yes
female	37	SCH	yes	2003	2004	1	Han	primary school and below	married/remarried	1	yes	healthy	in liuyang	spouse	farmer	no		no														No														no
female	30	SCH	yes	2007	2007	1	Han	middle school	married/remarried		yes	healthy	in liuyang	name	farmer			no														No														no
female	64	SCH	yes	2006	2006	1	Han	primary school and below	married/remarried		yes	healthy	in liuyang	spouse	farmer			no														No														no
female	66	SCH	yes	1985	1985	1	Han	primary school and below	married/remarried		yes	disabled	in liuyang	spouse	farmer			no														No														no
male	58	affective disorder	yes	2005	2005	1	Han	primary school and below	divorced					children	farmer	no		yes	1	2005	1											No														yes
female	47	suspected SCH		1996	1996	1	Han	high school	married/remarried		yes	healthy	in liuyang	self	farmer	no		yes	3	1996	1	1997	1	1999	1							No														no
female	36	SCH	yes	2006	2006	1	Han	high school	married/remarried	1	yes	healthy	in hunan	self	farmer	yes		no														No														no
female	49	affective disorder		1986	1986	1	Han	middle school	married/remarried		yes		in liuyang	self	farmer	yes	1995	yes	2	2001	1	2006	1									No														yes	1	1996	1
male	42	epileptic disorder	no	1985	1985	1	Han	middle school	never married					self				no														No														no
male	35	SCH	yes	2000	2000	1	Han	middle school	never married					parents	nonfarmer	yes	2000	yes	4													No														yes	1	2006	1
male	60	epileptic disorder	no	1983	1983	1	Han	middle school	married/remarried		yes	healthy	in liuyang	self	farmer	yes	2008	yes	17	1983	2	1984	2	1985	4	1988	2	1992	4	2003	3	No														no
male	65	SCH	yes	1971	1971	1	Han	primary school and below	married/remarried		yes		in liuyang	spouse	farmer	no		yes	16													No														yes	1	1984	1
female	36	epileptic disorder	no	1995	1995	1	Han		married/remarried		yes	healthy	in liuyang	self		yes	1995	no														No														no
female	46	affective disorder	no	1996	1996	1	Han				yes	healthy	in liuyang	self	farmer	yes	2009	yes	2	1996	1	2009	1									No														no
female	56	SCH	yes	1978	2002	1	Han	primary school and below	married/remarried	1	yes	healthy	in liuyang	spouse	farmer	yes	1978	no														Yes	2	1997	2											yes	1	1997	1
female	49	SCH	yes	1999	2000	1	Han	middle school	married/remarried	1	yes	healthy	in liuyang	spouse	farmer	no		yes	1	2011	1											No														no
female	40	other disorder	yes	2004	2006	1	Han	junior college	married/remarried		yes	healthy	in liuyang	spouse	farmer			yes	2	2004	1	2008	1									No														yes	1	2003	1
male	36	SCH	yes	1995	1995	1	Han	primary school and below	never married					parents	farmer	yes	1999	yes	5	1995	1	2007	1	2008	1	2009	1	2011	1			Yes	1	1996	1											no
female	33	suspected SCH		2002	2006	1	Han	primary school and below	married/remarried		yes	healthy	in liuyang	parents	farmer	yes	2002	yes	2	2002	1	2004	1									No														no
male	21	SCH	yes	2001	2001	1	Han	high school	never married					parents	student	no		no														No														no
female	70	suspected SCH		1985		1	Han		married/remarried	1	yes	healthy	in liuyang	spouse	farmer	yes	1985	yes	1	1986	1											No														no
female	40	suspected SCH	no	1990	2011	1	Han	primary school and below	married/remarried	1	yes	healthy	in liuyang	spouse	farmer	yes		no														No														no
female	32	affective disorder	yes	1999	2000	1	Han	primary school and below	married/remarried		yes	healthy	in liuyang	spouse	farmer	yes	1999	yes	3	2001	1	2005	1	1999	1							No														yes	2	2001	1
male	37	other disorder	yes	2007	2009	1	Han	primary school and below						parents	farmer		2007	yes	1	2007	1											No														yes		2007
male	48	SCH	yes	1990	2002	1	Han	primary school and below	never married					self	farmer			no														No														no
male	69	affective disorder	yes	1957	1998	1	Han	primary school and below	married/remarried		yes	healthy	in liuyang	spouse	farmer	yes	1957	yes	3	1995	1	1996	1	1997	1																					yes	40	1995	13
male	81	SCH	yes	2004	2006	1	Han	primary school and below	widowed					children	farmer	no		no														No														no
female	63	SCH	yes	1988	2003	1	Han	primary school and below	married/remarried	1	yes	healthy	in liuyang	spouse	farmer	no		no	1																											no
male	21	SCH	yes	2003		1	Han	middle school	never married					parents	farmer	yes	2009	yes	3	2010	1	2011	2									No														no
male	51	other disorder		2001	2006	1	Han	middle school	married/remarried		yes	healthy	in liuyang	parents	farmer	yes	2001	yes	1	2001	1											No														no
male	38	other disorder	yes	1994	2000	1	Han	middle school	married/remarried			healthy	outside hunan	parents	farmer	no		yes	2	1994	1	2011	1									No														yes	2	1997	1
female	46	SCH	yes	1992	1993	1	Han	middle school	married/remarried	1	yes	healthy	in liuyang	spouse	farmer	no		no														No														no
male	63	affective disorder	no	2011	2011	1	Han	middle school	married/remarried	1	yes	healthy	in liuyang	spouse	farmer	no		no														No														no
male	33	SCH	yes	2003	2009	1	Han	high school	never married					parents	farmer	no		yes	4													No														no
male	30	other disorder	yes	2001	2007	1	Han	high school	never married					parents	farmer	yes	1996	yes	1	1999	1											Yes	1	1999	1											yes	3	1999	1
male	51	SCH	yes	1984	1984	1	Han	middle school	married/remarried	1	yes	healthy	in liuyang	spouse	farmer	yes	1995	no														No														no
male	40	other disorder	yes	1998	2007	1	Han	primary school and below	never married		no			parents	farmer	yes	1978	yes	4	1975	1	1974	1	1982	1	1974	1					No	2													yes	4
female	53	SCH	yes	1989	2000	1	Han	high school	married/remarried			healthy	in liuyang	spouse	farmer	yes	1989	yes	2	1989	1											No														no
female	29	SCH	yes	2002	2009	1	Han	middle school	married/remarried	1	yes	healthy	in liuyang	spouse	farmer	no		no														No														no
male	56	SCH	yes	1978	2007	1	Han	primary school and below	widowed					parents	farmer	no		no														No														no
female	49	affective disorder	no	1988	1999	1	Han	primary school and below	married/remarried	1	yes	healthy	in liuyang	name	farmer	yes	1988	no														No														yes	2	1989	1
female	38	other disorder		1991	2000	1	Han	middle school	married/remarried		yes	healthy	in liuyang	name	farmer	no		no														No														no
male	55	SCH	yes	1978	1992	1	Han	primary school and below	married/remarried	1	yes	healthy	in liuyang	spouse	farmer	yes	1992	yes	2	1978	1	1980	1									No														no
male	56	SCH	yes	1997	2009	1	Han	primary school and below	married/remarried	1	yes	healthy	in liuyang	spouse	farmer	no		yes	10	1997	8	2000	2									No														no
female	27	suspected SCH	yes	2006	2007	1	Han	middle school	live together		yes	healthy	outside hunan	name	farmer	yes	2006	yes	1	2006	1											No														yes	2	2008	1
male	57	SCH	yes	2005	2006	1	Han	middle school	married/remarried	1	yes	healthy	in liuyang	spouse	farmer	yes	2005	yes	2	2006	1	2009	1									No														yes	5	2005	2
female	28	SCH	yes	2001	2001	1	Han	middle school	married/remarried	1	yes	healthy	in liuyang	self	farmer	no		no														No														no
male	45	SCH	yes	1991	1991	1	Han	middle school	married/remarried	1	yes	healthy	in liuyang	parents	farmer	yes	1996	no														No														yes	5	1996	3
female	39	SCH	yes	1989	1989	1	Han	middle school	married/remarried	1	yes	healthy	in liuyang	spouse	farmer	no		yes	3	1994	1	1998	1	2000	1							No														no
female	47	SCH	yes	1989	1989	1	Han	middle school	widowed				in liuyang	children	farmer			yes	1	1989	1											No														no
female	35	SCH	yes	1996	1996	1	Han	high school	married/remarried		yes	healthy	in liuyang	spouse	farmer			yes	2	1996	1	2001	1									No														yes	9	1996	3
female	32	SCH	yes	1999	1999	1	Han	middle school	married/remarried		yes	healthy	in liuyang	spouse	farmer			yes	1	2007	1											No														no
male	35	SCH	yes	1993	1993	1	Han							parents	farmer	no		yes	3	1993	1	1997	1	2002	1							No														no
female	46	SCH	yes	1972	1972	1	Han	middle school	never married					name	farmer	yes		yes	2	1984	1	1988	1									No														yes	10
female	40	SCH	yes	1987	1987	1	Han	primary school and below	married/remarried		yes	healthy	in liuyang	spouse	nonfarmer			yes	4	1987	1	1998	1	2000	1	2002	1					No														no
female	44	epileptic disorder	no	1990	1990	1	Han	middle school	married/remarried		yes	healthy	in liuyang	spouse	farmer			yes	3	1990	1	2003	1	2010	1							No														no
female	60	SCH	yes	2010	2011	1	Han	primary school and below	divorced					siblings	farmer	no		yes	2	2010	1	2011	1									No														yes		2010	1
female	60	SCH	yes	1990	1990	1	Han		married/remarried		yes	healthy	in liuyang	children	farmer			no														No														no
male	46	epileptic disorder	no	1982	1982	1	Han	primary school and below	never married					siblings	farmer	yes	1982	no														No														no
male	28	SCH	yes	1998	1998	1	Han	primary school and below	never married					parents	farmer			yes	4	1998	1	2002	1	2005	1	2010	1					No														yes	5	1998	2
male	43	SCH	yes	1992	1992	1	Han											yes	5	1992	1	1997	1	2004	1	2007	1	2010	1			No														no
female	35	SCH	yes	1998	1998	1	Han	primary school and below	married/remarried		yes	healthy	in liuyang	spouse	farmer			yes	2	2008	1	2009	1									No														no
male	72	SCH	yes	1999	1999	1	Han											yes	1	1999	1											No														no
female	41	other disorder	yes	1992	2006	1	Han	primary school and below	married/remarried		yes	healthy	in liuyang	self	farmer	yes	1992	no														No														yes		1992
male	53	SCH	yes	1982	1982	1	Han	primary school and below	never married					siblings	farmer	yes	1982	no														No														no
female	46	SCH	yes	1993	1993	1	Han	middle school	married/remarried	1	yes	healthy	in liuyang	spouse	farmer	yes	1995	no														Yes	4	1993	1	1995	1	2006	1	2010	1					no
female	45	SCH	yes	2000	2001	1	Han	primary school and below	married/remarried	1	yes	healthy	in liuyang	name	farmer	no		yes		2000	1											No														yes		2002	1
male	41	SCH	yes	2008	2009	1	Han	primary school and below	never married					parents	farmer	no		no														No														no
female	60	SCH	yes	2000	2001	1	Han	primary school and below	married/remarried	1	yes	healthy	in liuyang	spouse	nonfarmer	no		no														No														no
male	46	SCH	yes	1987	1987	1	Han	middle school	married/remarried	1	yes	disabled	in liuyang	parents	farmer	no		yes	2	1987	1	1992	1									Yes	1	1987	1											yes	3	1987	2
female	31	SCH	yes	1990		1	Han	primary school and below	married/remarried	1	yes	healthy	in liuyang	spouse	nonfarmer	no		no														No														no
male	25	mental retardation	no	1993	1993	1	Han	primary school and below	never married					parents	nonfarmer	no		no														No														yes	1	2006	1
female	33	SCH		2007	2007	1	Han	middle school	married/remarried		yes	healthy	in liuyang	self	farmer	no		yes	1	2007	1											No														no
female	45	SCH		2000	2000	1	Han		married/remarried		yes	healthy		spouse	farmer	no		yes	1	2000	1											No														no
male	26	SCH		2001	2001	1	Han	middle school	never married					parents	farmer	no		yes	2	2001	1	2003	1									No														yes	2	2000	2
female	31	SCH		2004	2008	1	Han		married/remarried		yes	healthy		parents	farmer	no		yes	1	2006	1											No														no
male	31	SCH		2009	2009	1	Han	high school	never married					parents	farmer	no		yes	9	2009	1	2011	4	2012	4							No														no
female	46			2005		1	Han	primary school and below	married/remarried		yes	healthy	in liuyang	spouse	farmer	no		yes	1	2005	1											No														no
female	64			2011	2011	1	Han		married/remarried		yes	healthy	in liuyang	spouse	farmer	no		yes	1	2011	1											No														no
male	61	SCH		2004	2004	1	Han	primary school and below	married/remarried		yes	healthy	in liuyang	spouse	farmer	no		yes	2	2004	1	2005	1									No														yes	6	2004	1
male	23	other disorder		1987	1989	1	Han	primary school and below	never married					parents	farmer	yes	1987	no														No														no
female	11	epileptic disorder		2001	2001	1	Han	primary school and below	never married					relatives				no														No														no
female	48	SCH		1989	1989	1	Han	high school	married/remarried		yes	healthy	in liuyang	spouse	farmer			yes	1	1990	1											Yes	15	1989	5	1990	5	1991	5							yes	5	1990	2
male	43	SCH		1978	1989	1	Han	middle school	married/remarried		yes	healthy	in liuyang	spouse	nonfarmer	no		yes	2	1989	1											Yes	1	1990	1											yes	1	1993	1
male	48	SCH		1987	1987	1	Han		married/remarried		yes	healthy	in liuyang	spouse	farmer	yes	1987	yes	1	1987	1																									yes	3	1988	3
female	23	SCH		2002	2006	1	Han	middle school	never married					parents	farmer	yes	2003	yes	3	2002	1	2006	1	2011	1							Yes	12	2006	2	2010	4	2011	6							yes	24	2006	5
female	27	SCH		2002	2002	1	Han	junior college	never married					parents	nonfarmer	no		yes	2	2001	1	2003	1									Yes	1	2003	1											no
female	23	SCH		2009	2010	1	Han	middle school	never married					parents		yes	2009	no														No														no
male	25	SCH		2011	2011	1	Han	junior college	never married					parents	nonfarmer	no		no														No														no
female	42	SCH	yes	1994	2005	1	Han	middle school	married/remarried		yes	healthy	in liuyang	spouse	farmer	no		yes	1	1994	1											No														no
female	32	epileptic disorder		1993	1993	1	Han	primary school and below	never married					parents	student	yes	1990	yes	15	1983	6	1984	3	1985	4	2011	2					No														no
female	31	SCH		2010	2011	1	Han	middle school	divorced					parents		yes	2010	yes	1	2011	1											Yes	2	2011	2											yes	3	2011	3
male	22	SCH	yes	2006	2006	1	Han	high school	never married					parents	nonfarmer	yes	2006	no														No														yes	1	2006	1
female	55	SCH	yes	1990	2000	1	Han	high school	married/remarried		yes	healthy	in liuyang	spouse	nonfarmer	yes	2000	yes	2	2000	1	2005	1									No	0													yes	0
male	62	SCH	yes	2004	2005	1	Han	middle school	married/remarried	1	yes	healthy	in liuyang	spouse	nonfarmer	no		yes	3	2004	1	2005	1	2008	1							Yes	2	2005	1	2008	1									no
female	50	epileptic disorder		1994	2006	1	Han	middle school	married/remarried	1	yes	healthy	in liuyang	spouse	nonfarmer	yes	1994	no	0													No	0													no	0
female	5	SCH	yes	1988	1989	1	Han	primary school and below	widowed					children	farmer	no		yes	1	1989	1											No														no
male	46	SCH	yes	1998	1998	1	Han	high school	divorced					parents				yes	10	2011	2											Yes	3													no
male	36	SCH	yes	1998	1999	1	Han	high school	never married					parents	nonfarmer	yes	1998	no	0													No	0													no	0
female	50	SCH	yes	1996	2007	1	Han	middle school	married/remarried	1	yes	healthy	in liuyang	spouse				yes	5	1993	1	1987	1	2007	1	2009	1	2010	1			Yes	2	2003	1	2006	1									no
female	18	SCH	yes	2009	2009	1	Han	junior college	never married					parents	student	no		yes	2	2009	2											No														no
male	57	SCH	yes	1970	1990	1	Han	primary school and below	divorced					siblings		yes	1970	yes	2	2008	2											No														no
male	27	other disorder		2009	2012	1	Han	primary school and below	never married					parents	nonfarmer	yes	2009	no														No														yes	3	2011	2
male	47	SCH	yes	2000	2006	1	Han	primary school and below	never married					parents	nonfarmer	yes	2000	no														No														yes	1	1994	1
female	48	SCH	yes	1990	1996	1	Han		married/remarried	1	yes	healthy	in liuyang	spouse	farmer	yes	1990	no														No														no
female	41	SCH	yes	1985	1990	1	Han	primary school and below	divorced					children	nonfarmer	yes	1985	no														No														no
female	49	SCH	yes	1987	1987	1	Han	middle school	divorced					parents				yes	2	1987	1	2006	1									No														no
male	33	SCH	yes	2001	2001	1	Han	middle school	never married					parents	nonfarmer	yes	2002	yes	3	2002	1	2005	1	2006	1							Yes	1	2006	1											no
female	44	SCH	yes	1988	1990	1	Han	high school	never married					parents	nonfarmer	yes	1988	yes	1	2000	1											No														no
male	45	SCH	yes	1996	1998	1	Han	middle school	married/remarried	1	yes	healthy	in liuyang	spouse	nonfarmer	yes	1998	no														No														yes	1	2008	1
male	29	SCH	yes	2010	2011	1	Han	middle school	never married					parents	nonfarmer	no		yes	1	2011	1											No														no
female	36	SCH	yes	1991	1991	1	Han	middle school	never married					parents				no														No														yes	5	1991	1
female	55	SCH	yes	1981	1990	1	Han	primary school and below	divorced					siblings	farmer	yes	1981	no														No														no
male	29	SCH	yes	2000	2004	1	Han	primary school and below	never married					relatives	nonfarmer	yes	1993	yes	2	2003	2											No														no
female	32	SCH	yes	2005	2007	1	Han	high school	married/remarried	1	yes	healthy	in liuyang	spouse	nonfarmer	no		no														No														no
female	36	SCH	yes	2007	2007	1	Han	middle school	married/remarried	1	yes	healthy	in liuyang	spouse				no														No														yes	1	2007	1
female	45	SCH	yes	1990	1990	1	Han	primary school and below	married/remarried	1	yes	healthy	in liuyang	spouse	nonfarmer	yes	1990	yes	1	1990	1											No														no
female	39	SCH	yes	2005	2008	1	Han	primary school and below						parents	nonfarmer	yes	2005	yes	9	2006	1	2007	2	2008	2	2009	1	2010	2	2011	1	No														yes	1	2009	1
female	38	SCH	yes	1997	1997	1	Han	junior college	married/remarried	1	yes	healthy	in liuyang	parents	nonfarmer	yes	2002	yes	3	2011	1	2005	1	1997	1							No														no
female	59	SCH	yes	2008	2010	1	Han	primary school and below	married/remarried	1	yes	healthy	in liuyang	spouse	nonfarmer	no		no														No														no
male	59	SCH	yes	2004	2008	1	Han	middle school	married/remarried	1	yes	healthy	in liuyang	spouse	nonfarmer	no		no														No														no
female	48	SCH	yes			1	Han	high school	divorced					children	nonfarmer	no		no														No														no
male	63	SCH	yes	1975	1975	1	Han	high school	married/remarried	1	yes	healthy	in liuyang	spouse				yes	2	1975	1	1982	1									No														no
female	32	SCH	yes	1985	1985	1	Han	primary school and below	never married					parents	nonfarmer	yes	1985	yes	3	1985	2	1987	1									No														yes	1	2004	1
male	60	SCH	yes	1973	1973	1	Han	junior college	never married					other non-relatives		yes	1997	no														No														no
male	53	SCH	yes	2009	2009		Han	middle school	married/remarried		yes	healthy	in liuyang	spouse	nonfarmer	yes	1997	yes	1													No														no
male	5	SCH	yes	1995	1995	1	Han	middle school	married/remarried	1	yes	healthy	in liuyang	spouse	nonfarmer	yes	2000	yes	3	1995	1	1996	2									No														no
female	34	SCH		1998	1998	1	Han	middle school	never married					parents	nonfarmer	no		yes	3	1998	1	2011	1	2007	1							Yes	2	2007	1	2010	1									no
male	60	SCH		2007	2007	1	Han	middle school	married/remarried		yes	healthy	in liuyang	spouse	nonfarmer	yes	2007	yes	2	2007	1	2009	1									No														no
male	40	SCH		1992	1993	1	Han	middle school	never married					parents	farmer	yes	2012	yes	4	1993	1	2004	1	2006	1	2012	1					No														yes	1	2012	1
female	45	SCH		1998	1999	1	Han	primary school and below	divorced					siblings	farmer	no		yes	2	1991		2005	1									No														no
female	43	SCH		2010	2010	1	Han	middle school	divorced					parents	farmer	no		yes	2	2010	1	2005	1									No														no
male	64	suspected SCH		2000	2000	1	Han	primary school and below	widowed					children	farmer	no		yes	2	2000	1	2003	1									No														no
female	49	SCH		2001	2011	1	Han	primary school and below	married/remarried		no	healthy	in liuyang	spouse	farmer	no		yes	2	2001	1	2004	1									No														no
female	63	SCH		1989	1990	1	Han	primary school and below	widowed					name	farmer	no		no														No														no
female	50	suspected SCH		2000	2000	1	Han	primary school and below	married/remarried		yes	healthy	in liuyang	spouse	farmer	yes	2012	yes	2	2000	1	2006	1									No														no
female	40	SCH		2000	2000	1	Han	primary school and below	live together		no	healthy	in liuyang	spouse	farmer	no		yes	1	2000	1											No														no
male	42	SCH		1999		1	Han	middle school						parents				no														No														no
female	46	mental retardation		1976	1976	1	Han	primary school and below	widowed					parents	farmer	yes	1976	no														No														no
female	39	suspected SCH		2009	2009	1	Han	middle school	married/remarried		no	healthy	in liuyang	spouse	farmer	yes	2009	yes	2	2009	1	2011	1									No														no
male	30	SCH		1982	1982	1	Han	primary school and below	never married					parents	farmer	yes	1982	no														No														no
female	65	SCH		1961	1975	1	Han	primary school and below	married/remarried		no	healthy	in liuyang	spouse	farmer	yes	1975	yes	1	1975	1											No														no
male	43	epileptic disorder		2005	2006	1	Han	middle school	married/remarried		yes	healthy	in liuyang	self	farmer	no		no														No														no
female	39	epileptic disorder		2001	2001	1	Han	middle school	married/remarried		yes	healthy	in liuyang	spouse	farmer	yes	2003	yes	3	2004	1	2005	1	2006	1							No														yes	5	2003	1
male	33	SCH		2003	2004	1	Han	middle school	never married					parents	farmer	yes	2004	yes	1	2005	1											Yes	2	2006	1	2007	1									yes	4	2051
female	52	SCH		2007	2010	1	Han	primary school and below	married/remarried		yes	healthy	in liuyang	spouse	farmer	no		yes	3	2010	1	2010	1	2007	1							Yes	4	2010	4											no
male	42	epileptic disorder		2006	2007	1	Han	middle school	married/remarried		yes	healthy	in liuyang	parents	farmer	no		yes	2	2007	1	2008	1									Yes	1	2008	1											yes	4	2007	1
female	41	epileptic disorder		2000	2001	1	Han	primary school and below	married/remarried		yes	healthy	in liuyang	spouse	farmer	yes	2003	no														Yes	2	2005	1	2008	1									yes	5	2005	1
female	38	SCH		2008	2008	1	Han	middle school	married/remarried		yes	healthy	in liuyang	spouse	farmer	no		no														No														yes	1	2008	1
male	45		yes	2007		1	Han	primary school and below	married/remarried	1	yes	healthy	in liuyang	spouse	farmer	no		no														No														no
male	44		yes	2008	2008	1	Han	primary school and below	married/remarried	1	yes	healthy	in liuyang	spouse	farmer	no		yes	2	2006	1	2008	1									No														no
male	38		yes	2005	2005	1	Han	primary school and below	married/remarried	1	yes	healthy	in liuyang	spouse	farmer			yes	4	2006	1	2007	1	2009	1	2011	1					No														no
female	23	suspected SCH		2007	2007	1	Han		never married					parents	farmer	no		yes	3	2008	1	2009	2	2010	1							No														no
male	41		yes	1996		1	Han	primary school and below	never married					parents	farmer	no		no														No														no
female	46		yes	1992	1992	1	Han	primary school and below	married/remarried	1	yes	healthy	in liuyang	spouse	farmer	no		yes	1	1992	1											No														no
female	47		yes	1996	1996	1	Han	primary school and below	married/remarried	1	yes	healthy	in liuyang	spouse	farmer	no		yes	3	1997	1	2001	1	2006	1							No														no
male	39		yes	2005	2005	1	Han	primary school and below	never married					parents	farmer			yes	2	2006	1	2008	1									No														no
male	37		yes	2001	2001	1	Han	middle school	married/remarried	1	yes	healthy	in liuyang	spouse	farmer			yes	2	2001	1	2002	1									No														no
male	36		yes	2006	2006	1	Han	middle school	married/remarried	1	yes	healthy	in liuyang	spouse	farmer	no		yes	2	2006	1	2007	1									No														no
male	38		yes	2005	2005	1	Han	middle school	married/remarried	1	yes	healthy		parents	farmer	yes	2005	yes	3	2005	1	2007	1	2009	1							No														no
male	30		yes	2006	2006	1	Han	primary school and below	divorced					parents	farmer	no		yes	3	2008	1	2009	1	2011	1							No														no
male	29		yes	2004	2004	1	Han	primary school and below	married/remarried	1	yes	healthy		spouse	farmer			yes	1	2006	1											No														no
male	80		yes	1996	1996	1	Han	primary school and below	widowed					children	farmer	yes	1996	yes	1	1997	1											Yes	2	2008	1	2009	1									no
female	42		yes	2005	2006	1	Han	middle school	married/remarried	1	yes	healthy	in liuyang	spouse	farmer	no		yes	1	2006	1											No														no
male	30		yes	1996	1996	1	Han	primary school and below	never married					spouse	farmer	yes	1996	no														No														no
female	43	epileptic disorder	no	1993	1995	1	Han	primary school and below	married/remarried			healthy	in liuyang	spouse	farmer			yes	1	1995	1
male	67	SCH	yes	1953	1953	1	Han	primary school and below	never married				in liuyang	children	farmer			yes	6	2005	6											No														no
female	23	mental retardation	no	1995		1	Han		never married					parents	farmer			no														No														no
female	23	epileptic disorder		1999	1999	1	Han	primary school and below	married/remarried				in liuyang	spouse	farmer			no																												yes	1	1998	1
male	35	mental retardation	no	1980	1982	1	Han	primary school and below		1				parents	farmer			no																												yes	3	2008	3
female	61	SCH	yes			1	Han	primary school and below	married/remarried		yes	healthy	in liuyang	spouse	farmer			no														No														no
female	32	SCH	yes	2008	2008	1	Han	middle school	married/remarried			healthy	in liuyang	parents	farmer			yes	2	2008	2											Yes	1	2011	1											yes	1	2008	1
female	32			1999		1	Han	middle school	never married					parents				no														No														no
male	52					1	Han		married/remarried	1	yes	healthy	in liuyang	spouse		yes		yes	3	1987	1	1982	1	1997	1							No														no
male	57			1989		1	Han	middle school	married/remarried	1	yes	healthy	in liuyang	spouse	farmer			yes	3	1989	1	1990	1	1993	1							Yes	1	1989	1											yes	3	1989	1
male	63	affective disorder		1990	1990	1	Han	middle school	married/remarried		yes	healthy	in liuyang	spouse	nonfarmer	yes		yes	6	1990	1	1992	1	1994	1	1995	1	1998	1	2007	1	No														no
female	46	SCH		2003	2003	1	Han	primary school and below	married/remarried	1	yes	healthy	in liuyang	spouse	farmer	yes		yes	2	2003	1	2004	1									No														no
female	40	affective disorder		1993	1993	1	Han	middle school	married/remarried	1	yes	healthy	in liuyang	spouse				yes	1	1993	1											No														no
female	34	affective disorder		1994	1994	1	Han	high school	never married					parents		yes	1994	yes	1	2008	1											No														no
female	41					1	Han	primary school and below	married/remarried	2	yes	healthy	in liuyang	spouse	farmer			yes	3	1999	1	2005	1	2007	1							No														yes	4	2007	4
male	38	SCH				1	Han		never married					parents	farmer	yes		yes	2	2008	1	2011	1									No														no
female	53	SCH		1996	1996	1	Han	primary school and below	widowed					children	farmer			yes	1	1996	1											No														no
male	63			1973		1	Han	primary school and below	never married					siblings	farmer	yes		no														No														no
female	46			1988		1	Han	middle school	married/remarried	1	yes	healthy	in liuyang	spouse	farmer	no		yes	2	1986	1	1996	1									No														no
female	45			1998		1	Han	middle school	married/remarried	1	yes	healthy	in liuyang	spouse	farmer			yes	2	1998	1	2010	1									No														yes	6	1998	3
male	41	SCH	yes	1989		1	Han	middle school	married/remarried	1	yes	healthy	in liuyang	spouse	farmer	yes		no														No														no
female	26	SCH	yes	2004	2004	1	Han	middle school	never married					self	farmer	yes	2004	yes	3	2005	1	2006	1	2008	1							No														no
male	45	SCH	yes	2005	2005	1	Han	middle school	married/remarried	1	yes	healthy	in liuyang	self	farmer	no		yes	2	2008	1	2009	1									No														no
male	5	SCH	yes	1985	1985	1	Han	primary school and below	married/remarried	1	yes	healthy	in liuyang	self	farmer	yes	1990	yes	4	2005	2	2008	2									No														yes
female	38	SCH	yes	1990	1990	1	Han	primary school and below			yes	disabled	in liuyang	self	farmer	no		no														No														no
female	44	SCH	yes	1989	1990	1	Han	primary school and below	married/remarried	1	yes	healthy	in liuyang	self	farmer	no		yes	4	2008	1	2009	1	2010	2							No														yes	1	2009	1
female	45	SCH	yes	2004	2005	1	Han	primary school and below	married/remarried	1	yes	healthy	in liuyang	self	farmer	no		yes	5	2005	2	2007	2	2008	1							No														no
male	35	SCH	yes	1989	1989	1	Han				yes	healthy	in liuyang	self	farmer	no		yes	5	2005	2	2007	1	2009	2							No														yes	5	2005	2
male	27	mental retardation	no	1990	1990	1	Han	primary school and below	never married					name	farmer	no		no														No														no
female	50	SCH	yes	1988	1989	1	Han	primary school and below	married/remarried	1	yes	healthy	in liuyang	self	farmer	no		yes	1	2008	1											No														no
female	59	SCH	yes	1997	1998	1	Han	primary school and below	married/remarried	1	yes	healthy	in liuyang	self	farmer	no		yes	1	2007	1											No														no
female	40	SCH	yes	1987	1987	1	Han	primary school and below			yes	healthy	in liuyang	self	farmer	no		yes	1	2007	1											No														no
male	42	SCH	yes	1985	1985	1	Han	primary school and below			yes	disabled	in liuyang	self	farmer	no		no														No														yes	3	2006	1
male	29					1	Han	middle school						parents	farmer	yes	2000	no														Yes	1	2002	1											yes	2	2002	1
female	53	suspected SCH		2004	2004	1	Han	primary school and below	married/remarried		yes	healthy	in liuyang	spouse	farmer	no		no														No														no
female	43					1	Han	primary school and below	married/remarried		yes	healthy	in liuyang		farmer	no		no														No														no
female	65			1998	1998	1	Han		married/remarried		yes	healthy	in liuyang	name	farmer			no														No														yes	5	2008	2
	35			1994		1	Han	middle school	never married					parents	farmer	yes	1994	no														No														no
female	36	SCH	yes	2004	2005	1	Han	primary school and below	married/remarried		yes	healthy	in liuyang	name	farmer	no		no														No														no
female							Han							name				no														No														no
female	48			1990		1	Han	primary school and below	married/remarried		yes	healthy	in liuyang	spouse	farmer	yes	1992	no														No														no
female	40	affective disorder	no			1	Han	primary school and below	married/remarried		yes	healthy	in liuyang	parents	farmer
male	31	SCH	yes	2003	2004	1	Han	middle school	never married					parents	farmer	yes	2004	no														No														yes	2
male	38	suspected SCH		1998	2000	1	Han	middle school	married/remarried		yes	healthy	in liuyang	spouse	farmer	no		no														No														no
male	38	SCH	yes	2001	2005	1	Han	middle school	never married					parents	nonfarmer			no														No														yes
male	50	epileptic disorder		1974	1974	1	Han	primary school and below	married/remarried		yes	disabled		parents	farmer			yes	1	1974	1
female	35					1	Han	primary school and below	married/remarried		yes	healthy	in liuyang	name	farmer	no		no														No														no
female	28	SCH		2008	2008	1	Han		married/remarried		yes	healthy	in liuyang	spouse	farmer			no														No														no
female	27	SCH		2002	2003	1	Han		married/remarried		yes	healthy	in liuyang	spouse				yes	1	2003	1											No														no
female	47	SCH		1990	2006	1	Han	primary school and below	married/remarried		yes	healthy	in liuyang	spouse				yes	1	1990	1											No														no
female	46	SCH		1993		1	Han		married/remarried		yes	healthy	in liuyang	spouse	farmer	no		yes	1	1993	1											No														no
male	39	SCH	yes	1992	1992	1	Han	primary school and below	never married					parents	farmer	yes	1992	yes	1	1992	1											No														yes	4	2004	2
male	36	other disorder		1998		1	Han	primary school and below	never married					parents	farmer	no		yes	2	1998	2											No														no
male	58	other disorder		1985		1	Han	primary school and below	never married					siblings	farmer	no		no														No														no
male	67	SCH	yes	1972	1972	1	Han	primary school and below	married/remarried	1	yes	healthy	in liuyang	spouse	farmer	yes	1985	yes	1													No														no
female	56	SCH	yes	2003	2003	1	Han	primary school and below	married/remarried	1	yes	healthy	in liuyang	spouse	farmer	yes	2003	yes	2	2003	1	2011	1									No														no
male	30	SCH	yes	2004	2004	1	Han	middle school	never married					parents	farmer			yes	1	2009	1											Yes	2	2009	1	2010	1									no
male	42	SCH	yes	2004	2004	1	Han	primary school and below	married/remarried		yes	healthy	in liuyang	spouse	farmer			yes	1	2005	1											No														no
male	40	SCH	yes	1992	1993	1	Han							self	farmer			no														Yes	1	2006	1											yes
female	25	SCH	yes	2006	2009	1	Han	primary school and below	never married					parents	farmer			no														No														no
male	27	SCH	yes	2006	2006	1	Han	primary school and below						parents		yes	2006	yes	1	2006	1											No														yes	1	2006	1
male	26	SCH	yes	2005	2005	1	Han	middle school						parents	farmer			yes	1	2010	1											Yes	1	2009	1											yes	2	2008	1
male	62	SCH	yes	2004	2004	1	Han	primary school and below	married/remarried		yes	healthy	in liuyang	spouse	farmer			yes	1	2007	1											No														no
male	26	SCH	yes	2009	2009	1	Han	primary school and below		1				parents				yes	1	2009	1											No														no
female	23	SCH	yes	2007	2007	1	Han	primary school and below	never married					parents	farmer			yes	2	2007	1	2008	1									Yes	1	2008	1											no
male	30	SCH	yes	2007	2007	1	Han				yes	disabled	in liuyang	spouse		yes		no														No														no
male	45			1996	1996	1	Han	primary school and below	never married					siblings	farmer	yes	2000	yes	3	2001	1	2003	1	2005	1							No														yes	3	2001	1
female	58			2004	2004	1	Han	high school	married/remarried		yes	healthy	in liuyang	spouse	farmer	yes	2004	yes	5	2004	1	2005	1	2007	1	2008	1	2011	1			No														yes	3	2005	1
female	47			1986	1987	1	Han	primary school and below	married/remarried		yes	healthy	in liuyang	spouse	farmer	yes	1991	yes		1991		1992		1993	1	1994	1	2008		2009	1	Yes	3	1992	1	1996	1	2008	1							yes	3	2004	1
female	43			1989	1991	1	Han	middle school	married/remarried	1	yes	healthy	in liuyang	spouse	nonfarmer	no		yes	1	1991	1											No	1													no
female	30		yes	1997	1997	1	Han	middle school	married/remarried	2	no	healthy	in liuyang	spouse	farmer	no		yes	3	1997	3	2011	1									No														no
male	37		yes	1991	2000	1	Han	high school	never married					parents	farmer	no		yes	3	2010	1																									yes	1	2008	1
female	42			2000	2000	1	Han	middle school	married/remarried	1	yes	healthy	in liuyang	spouse				yes	1	2001	1											No														yes	3
female	43			1990	1990	1	Han	middle school	married/remarried		yes	healthy	in liuyang	spouse	farmer	yes	1992	yes	1	1990	1											Yes	1													no
female	37			2010	2011	1	Han	middle school	married/remarried	1	yes	healthy	in liuyang	spouse		no		no														No														no
female	32			2000	2000	1	Han	junior college			yes	healthy	in liuyang	parents	farmer	yes	2006	yes	2	2000	1	2002	1									Yes	1
male						1	Han
female						1	Han
female	36			2002	2002	1	Han	primary school and below	married/remarried		yes		in liuyang	spouse	farmer	yes	2004	yes	1	2004	1											No														yes	1	2004	1
female		suspected SCH				1	Han
male	56	epileptic disorder		1995	1996	1	Han	primary school and below	divorced					parents	farmer	yes	2010	yes	1	1990	1											No														yes	2	2010	1
male	46	SCH		1998	2001	1	Han	primary school and below	never married					parents	farmer	no		no														No														no
	21	SCH		2009	2009	1	Han		never married					parents	student	no		yes	1	2009	1											No														no
male	31	SCH		2010	2010	1	Han	high school	never married					parents	farmer	yes	2010	yes	2	2010	1	2011	1									No														no
male	60	epileptic disorder				1	Han	primary school and below	married/remarried		yes	healthy	in liuyang	children		no		no														No														no
male	39	SCH		2005	2006	1	Han	primary school and below	never married					parents	farmer	yes	1987	no														No														no
male	42	SCH		2000	2000	1	Han	primary school and below	never married					siblings	farmer			no														No														yes	2	2000	1
female	37	SCH		2006	2006	1	Han	primary school and below	divorced					parents	farmer	no		yes	1	2004	1											No														no
female	62	SCH		1995	1995	1	Han	primary school and below			yes	healthy	in liuyang	spouse	farmer	no		no														No														no
male	52	SCH		1995	1996	1	Han	primary school and below	married/remarried		yes	healthy	in liuyang	spouse	farmer			no														No														no
female	52	SCH		2000	2001	1	Han	primary school and below	married/remarried		yes	healthy	in liuyang	spouse	farmer	no		yes	2	2001	1	2003	1									No														no
male	59	SCH		2000	2000	1	Han	primary school and below	married/remarried		yes	healthy	in liuyang	spouse	farmer			no														No														no
male	51	SCH		1985	1985	1	Han		married/remarried		yes	healthy	in liuyang	name	farmer	no		yes	2	1985	1	2002	1									Yes	1	1985	1											yes	2	1985	2
female	50	SCH		1998	1998	1	Han	primary school and below	married/remarried		yes	healthy	in liuyang	spouse		yes	2001	yes	6	1998	1	2001	1	2003	1	2007	1	2010	1	2011	1	Yes	1	2011	1											yes	2	2010	1
female	64	SCH		1980	1980	1	Han	primary school and below	married/remarried		yes	healthy	in liuyang	children	farmer	no		yes	6	1980	1	2000	1	2002	1	2006	1	2008	1	2010	1	No														yes	2	2006	1
male	31	SCH		2003	2003	1	Han	middle school	never married					self	farmer	no		yes	2	2003	1	2010	1									Yes	1	2005	1											yes	3	2009	3
female	44	SCH		2004	2004	1	Han							spouse		no		yes	3	2004	1	2006	1	2009	1							No														no
male	49	SCH		1981	1981	1	Han	primary school and below	never married					parents	farmer	yes	1981	yes	1	1981	1											No														yes	3	2001	3
male	63	affective disorder		1980	2012	1	Han		married/remarried		yes	healthy	in liuyang	name	farmer	no		yes	1	2012	1											No														yes	2	2012	2
female	29	SCH		2000	2000	1	Han		never married					parents		no		yes	1	2000	1											No														no
	30	SCH		2003	2003	1	Han	middle school	never married					parents	farmer	no		yes	1	2003	1											No														no
female	47	SCH		2001	2001	1	Han	primary school and below	married/remarried		yes	healthy	in liuyang	spouse	farmer	no		yes	2	2002	1	2006	1									No														no
male	45	suspected SCH	yes	1995	1996	1	Han	primary school and below	never married						farmer	yes	1998	yes	3	1996	1	1998	2									No														yes	3	1996	1
male	32	SCH	yes	1997	1008	1	Han	primary school and below	married/remarried		yes	healthy	outside hunan	self		no		yes	1	1998	1											No														yes		1998	2
female	40	SCH	yes	2006	2006	1	Han	primary school and below	married/remarried		yes	healthy	in liuyang	spouse	farmer	no		no														No														yes		2009
male	55	SCH	yes	1985		1	Han	primary school and below	married/remarried		yes	healthy	in liuyang	self		yes	1986	yes	1	1985	1																									yes
female	22	SCH	yes	2007	2007	1	Han	primary school and below	never married					parents	farmer	no		yes	2	2008	1	2011	1									No														yes		2008	10
male	43	SCH	yes	1991	2001	1	Han	primary school and below	never married					parents		yes	1992	yes	1	1992	1											Yes	1	2010	1											yes
male	34	SCH	yes	1979		1	Han	primary school and below	never married					parents		yes	1980	yes	1	2011	1																									yes	2	2009	1
female	65	SCH	yes	1976	1976	1	Han	primary school and below	married/remarried		yes	healthy	in liuyang	spouse	farmer	no		yes	8	1976	1	1981	1	1982	2	1983	1	1984	2	2010	1	Yes	3	1981	1	1984	1	2010	1							yes		1981	2
female	55	SCH	yes	2002	2002	1	Han	primary school and below	married/remarried		yes	healthy	in liuyang	self		no		yes	1	2002	1											No														yes	1	2002	1
male	55	SCH	yes	1996	1996	1	Han	primary school and below	married/remarried		yes	healthy	in liuyang	spouse		no		yes		1996	1	1997	1									No														yes		1996	2
male	52	SCH	yes	2002	2002	1	Han	primary school and below	divorced					self	farmer	no		no														No														no
female	57			2000	2001	1	Han	primary school and below	married/remarried		no	healthy	in liuyang		farmer	no		yes	2	2000	1	2001	1									No														yes	1	2000	1
female	36			2001	2001	1	Han	middle school	married/remarried		yes	healthy	in liuyang	spouse	farmer	yes		yes	2	2004	2											No														no
male	26	other disorder		2002	2002	1	Han
male	25			2006	2006		Han		never married					name	farmer			yes	1	2006	1
female	45			2010	2010	1	Han	middle school	married/remarried		yes	healthy	in liuyang					yes	1	2010	1											No														no
female	41					1	Han	primary school and below	never married					parents	farmer	yes	1974	no														No														yes	7	2006	1
female	46	affective disorder	no	2011	2011	1	Han		married/remarried	1	yes	healthy	in liuyang	self	farmer			yes	1	2011	1
male	42			1975	1975	1	Han	primary school and below	never married					parents	farmer			no														No														no
male	34			2002	2002	1	Han	middle school	married/remarried		yes	healthy	in hunan	spouse	farmer	yes	2012	yes	1	2012	1											No														no
male	27			2002	2003	1	Han	primary school and below	never married					parents	farmer	yes		yes	2	2002	1	2003	1									No														no
female	72	suspected SCH		2008	2008	1	Han	primary school and below	married/remarried		yes	healthy	in liuyang	spouse	farmer	yes	2008	yes	1	2008	1											No														no
female	37			1996	1997	1	Han	primary school and below	widowed					parents	farmer	yes		yes	4	1996	1	2007	1	2010	1	2011	1					Yes	1	2007	1											no
female	25	SCH	yes	2012	2012	1	Han	middle school	married/remarried	1	yes	healthy	in hunan	name	farmer			yes	1	2012	1
male	47	suspected SCH		1986	1986	1	Han	primary school and below	never married					siblings	farmer	yes	2011	yes	3	1987	1	1990	1	2011	2							No														no
female	36			2001	2001	1	Han	middle school	married/remarried		yes	healthy	in liuyang	spouse	farmer	yes	2001	yes	3	2001	1	2004	1	2010	1							No														no
female	51	SCH	yes	1981	1981	1	Han	middle school	married/remarried	1	yes	healthy	in liuyang	spouse	farmer	no		yes	20	2000	5	2001	4	2003	1	2004	2	2008	2	2011	5	Yes	1													yes	7	2005	1
female	58	SCH	yes	1993		1	Han	primary school and below	married/remarried	1	yes	healthy	in liuyang	spouse	farmer	yes		no														No														no
male	37	SCH	yes	2000	2000	1	Han	primary school and below	never married					parents	farmer	yes		no														No														no
male	49					1	Han	primary school and below						children	farmer	yes		no														No														no
male	29	SCH	yes	2005	2006	1	Han	primary school and below	never married					parents	farmer			yes	1	2012	1											No														yes	2	2011	1
female	41	SCH	yes	2005	2006	1	Han	middle school	married/remarried	1	yes	healthy	in liuyang	spouse	farmer			yes	1	2011	1											No														yes	7	2010	2
male	62	suspected SCH		2005	2008	1	Han	primary school and below	divorced				in liuyang	self	farmer	no		no														No														no
female	30	SCH		2000	2000	1	Han	middle school	never married					name	farmer			yes	1	2011	1											No														no
female	47	SCH	yes	2006	2006	1	Han	middle school	married/remarried	1	yes	healthy	in liuyang	self	farmer			no														No														no
female	33	SCH	yes	2007	2007	1	Han	middle school	married/remarried	1	yes	healthy	in liuyang	self	farmer			no														No														no
female	39	SCH	yes	2001	2006	1	Han	primary school and below	married/remarried	1	yes	healthy	in liuyang	spouse	farmer	no		no														No														no
female	38	SCH		2000	2000	1	Han	middle school	widowed					self	farmer			no														No														no
female	47	suspected SCH		2000	2003	1	Han	middle school	married/remarried	1		healthy	in liuyang	spouse	farmer	no		yes		2003	1											No														no
male	35	SCH					Han		married/remarried		yes	healthy	in liuyang	self		no		no														No														no
male	40	SCH		1995	1995	1	Han	primary school and below	never married									yes	10	1995	1	1996	1	1997	2	1998	3	1999	2	2000	1	No														no
female	62	SCH		1980	1980	1	Han	primary school and below	married/remarried		yes	healthy	in liuyang		farmer	no		yes	3	1980	1	1981	1	1985	1							No														no
female	5	SCH		1995	1995	1	Han	primary school and below	married/remarried		yes	healthy	in liuyang	spouse	farmer	no		no														No														no
male	18	epileptic disorder		2008	2008	1	Han	middle school	never married					parents	student	yes	2010	yes	5	2008	1	2009	2	2010	2							No														no
female	45	SCH		2000	2000	1	Han	middle school	never married					spouse	farmer	no		no														No														no
female	48	SCH		1990	1990	1	Han	primary school and below	married/remarried		yes	healthy	in liuyang	spouse	farmer	no		no														No														no
male	32	SCH				1	Han		never married					parents	farmer			no														No														no
male	25	affective disorder		2005	2005	1	Han	middle school	never married					self	farmer	no		no														No														no
male	47	SCH		2000	2000	1	Han	primary school and below	married/remarried		yes	healthy	in liuyang	spouse	farmer	no		no														No														no
male	36	epileptic disorder		2005	2005	1	Han	middle school	never married					siblings	farmer	yes	2005	yes	2	2005	1	2006	1									No														no
female	45	SCH		1990	1990	1	Han	primary school and below	married/remarried			healthy	in liuyang		farmer			no														No														no
male	28	SCH				1	Han	middle school	never married					parents		no		no														No														no
female	39	SCH		1998	1998	1	Han	primary school and below	married/remarried		yes	healthy	in liuyang	spouse	farmer	no		yes	1	2011	1											No														no
male	23	SCH		2008	2008	1	Han	middle school	never married					parents	farmer	no		no														No														no
female	46	SCH		1990	1990	1	Han	primary school and below	married/remarried		yes	healthy	in liuyang		farmer	no		no														No														no
male	21	SCH		2008	2008	1	Han	middle school	never married					parents	farmer	no		no														No														no
male	43	SCH	yes	1992	1992	1	Han	primary school and below	never married					parents	farmer	no		no														No														no
male	43	SCH	yes	2011	2011	1	Han	middle school	married/remarried	2	yes	healthy	in liuyang	spouse	farmer	no		no														No														no
female	26	SCH	yes	2008	2008	1	Han	middle school	married/remarried		yes	healthy	outside hunan	spouse	farmer	yes		yes	1	2008	1											No														no
male	44	SCH	yes	2010	2010	1	Han	middle school	married/remarried	1	yes	healthy	in liuyang	spouse	farmer	no		yes	1	2010	1											No														no	0
male	46	SCH	yes	1996	1996	1	Han	middle school	divorced					parents	farmer	no		no														No														no
female	53	SCH		1994	1994	1	Han	middle school	married/remarried		yes	healthy	in liuyang	spouse	farmer	no		yes	2	2010	2											No														no
male	62	SCH		1978	2001	1	Han	middle school	divorced					other non-relatives	farmer	yes	2001	no														No														no
male	55	affective disorder	no	2008	2008	1	Han	junior college	married/remarried		yes	healthy	in liuyang	spouse	nonfarmer	no		yes	1	2008	1											No														no
male	38	suspected SCH		2000	2000	1	Han	high school	divorced					parents	farmer	yes	2000	yes	3	2010	2	2011	1									No														yes	3	2000	1
male	23	suspected SCH		2005	2005	1	Han	middle school	never married					name	farmer	no		yes	1	2005	1											No														no
female	43	suspected SCH		2003	2003	1	Han	middle school	married/remarried	1	yes	healthy	in liuyang	spouse	farmer	yes		yes		2003	1	2006	1									No														no
female	42	suspected SCH		1996	2006	1	Han	primary school and below	married/remarried	1	yes	healthy	in liuyang	spouse	farmer			yes	1	2006	1											No														no
male	26	suspected SCH		2005	2005	1	Han	primary school and below	never married					parents	farmer	yes	2011	yes		2005	1	2007	1	2009	1							No														yes		2005	1
male	24		yes	2004	2005	1	Han	middle school	never married					parents	nonfarmer	no		yes	1	2005	1											No														no
female	41		yes	2003	2004	1	Han	middle school	married/remarried		yes	healthy	in liuyang	relatives	farmer	no		yes	2	2004	1	2008	1									No														yes	1	2010	1
female	42	SCH	yes	1999	2003	1	Han	middle school	married/remarried	1	yes	healthy	in liuyang	siblings	farmer	yes	2009	yes	1	2005	1
male	42	SCH	yes	1990	2000	1	Han	middle school	never married				in liuyang	parents		yes	1990	yes	2	2000	1	2005	1									No														no
male	41		yes	2000	2000	1	Han	high school	married/remarried		yes	disabled	in liuyang	self	nonfarmer	yes	2001	yes	2	2000	1	2005	1									No														no
male	35	SCH	yes	2007	2007	1	Han	middle school	married/remarried	1	yes	healthy	in liuyang		farmer	no		yes	1	2007	1											No														yes	1	2007	1
male	33	SCH	yes	2005	2005	1	Han	high school	married/remarried	1	yes	healthy	in liuyang	siblings	farmer	no		no														No														no
female	28	SCH	yes	2006	2011	1	Han	middle school	married/remarried	1	yes	healthy	in liuyang	spouse	farmer	yes	2011	no														No														no
female	78	SCH	yes	1992	2009	1	Han	primary school and below	married/remarried	1	yes	healthy	in liuyang	spouse	farmer	no		no														No														no
female	47	SCH	yes	1992	2006	1	Han	primary school and below	married/remarried	1	yes	healthy	in liuyang	spouse	farmer	yes	1992	yes	2	2010	1	2009	1									No														yes	3	2008	1
male	28	SCH	yes	2009	2010	1	Han		never married					parents		yes	2009	yes	3	2010	2	2011	1									No														no
female	62	affective disorder	no	2007	2010	1	Han		married/remarried	1	yes	healthy	in liuyang	spouse	farmer	no		no														No														no
male	42	SCH	yes	1997	2006	1	Han	primary school and below	divorced					parents	farmer	yes	1997	no														No														yes	1	2009	1
female	38	affective disorder	no	1992	2006	1	Han	middle school	married/remarried	1	yes	healthy	in liuyang	spouse	farmer	no		no														No														no
female	49	SCH	yes	1999	2006	1	Han	primary school and below	married/remarried	1	yes	disabled	in liuyang	spouse	farmer	yes	1999	yes	1	2010	1											No														no
female	39	SCH	yes	1989	2009	1	Han	primary school and below						parents	farmer			yes	2	2010	2	2011	1									No														yes		2010	2
male	46	SCH	yes	1984	1996	1	Han	primary school and below	never married					parents		yes	1985	no														No														no
male	71	SCH	yes	1963	1963	1	Han	college and above			no	healthy	in liuyang	spouse	farmer	yes	1988	yes	8	1965	1	1967	1	1870	1	1972	1	1975	1	1878	1	Yes	1	1972	1											yes	4	1976	1
female	41	SCH	yes	1998	1998	1	Han	primary school and below	live together					spouse		yes	2008	yes	2	1997	1	2004	1									No														no
female	56	SCH	yes	1987	1987	1	Han		married/remarried			healthy	in liuyang	spouse				no														No														yes	1	1994	1
female	38	SCH	yes	1998	1998	1	Han	primary school and below	live together	2	no	healthy	in liuyang	spouse	farmer	yes	1998	yes	5	1998	1	2008	1	2009	1	2010	1	2011	1			No														yes	1	2008	1
male	44	SCH	yes	1988	1988	1	Han	middle school	live together		no	healthy	in liuyang	spouse	farmer	yes	1988	yes		1988	1	1993	1	1997	1	2006	1	2009	1	2011	1	Yes		1988	1											yes		1988	1
female	35	SCH	yes	1989	1989	1	Han	primary school and below	never married					parents	farmer	yes	1989	no														No														no
female	28	SCH	yes	1983	1983	1	Han	middle school	never married					spouse	farmer	yes	1999	yes		1998	1	1999	1	2003	1	2006	1	2008	1	2010	1	Yes		1999	1											yes	1	2003	1
female	48	SCH	yes	1988	1988	1	Han	primary school and below	live together		no	healthy	in liuyang	spouse	farmer	yes	1988	no														No														yes	1	2007	1
female	82	other disorder		2004	2011	1	Han	primary school and below	widowed					children	farmer	yes		yes	1	2010	1											No														no
female	48	SCH		1982	1985	1	Han	primary school and below	married/remarried		yes	healthy	in liuyang	spouse	farmer			yes	3	1995	1	1990	1	2008	1							No														yes	3
female	67	SCH		1978	1980	1	Han	primary school and below	married/remarried		yes	healthy	in liuyang	spouse	farmer			yes	6	1980	2	1990	2	2000	1	2010	1					No														yes	20
female	25	SCH		1987	1987	1	Han	middle school	married/remarried					spouse	farmer			no														No														yes	5	2010	2
female	52	SCH			2008	1	Han	primary school and below	married/remarried		yes	healthy	in liuyang	self	farmer	no		yes	2	1998	1	2006	1									No														no
female	50	SCH		2002	2002	1	Han	primary school and below	married/remarried		yes	healthy	in liuyang	name	farmer	no		no														No														no
male	29	SCH		2005	2008	1	Han	primary school and below	never married					parents	farmer	yes	2010	yes	1	2012	1											No														yes	10	2005	3
male	38	epileptic disorder	no	2002	2002	1	Han	middle school	married/remarried	2	no	healthy	in liuyang		farmer	no		no														No														no
female	45	affective disorder	no	1999	1999	1	Han	middle school	married/remarried			healthy	in liuyang	spouse	nonfarmer	no		no														Yes														no
	28	SCH	yes	2009	2009	1	Han	middle school	married/remarried			healthy	in liuyang		farmer	no		yes	3	2009	1	2010	2									No														no
	27	affective disorder	no	2001	2001	1	Han	middle school	married/remarried	1	yes	healthy	in liuyang	spouse	nonfarmer	no		yes	3	2001	1	2003	1	2005	1							No														yes	2	2003	1
male	27	affective disorder	no	2001	2001	1	Han	middle school	married/remarried	1	yes	healthy	in liuyang	parents	nonfarmer	yes	2005	yes	3	2001	1	2003	1	2006	1							No														yes	1	2006	1
male	48			1996	1996	1	Han	primary school and below	married/remarried		yes	healthy	in liuyang	parents	farmer	yes	1996	yes	1	1996	1											No														yes	2	1987	1
female	32			2006	2006	1	Han	middle school	married/remarried		yes	healthy	in liuyang	spouse	nonfarmer	no		yes		2006	1											No														no
male	50	SCH		2002	2003	1	Han	primary school and below	widowed					parents	farmer	yes	2009	yes	1	2003	1											No														no
female	58	SCH		2001	2001	1	Han	primary school and below	married/remarried		yes	healthy	in liuyang	spouse	farmer	no		no														No														no
male	44	SCH		1997	1998	1	Han	primary school and below	married/remarried	1	yes	healthy	in liuyang	parents	farmer	yes	1998	no														No														no
female	30	SCH		2000	2000	1	Han	middle school	married/remarried		yes			spouse	farmer	no		no														No														no
female	43	SCH		2011	2012	1	Han	primary school and below	married/remarried		yes	healthy	in liuyang	spouse	farmer	yes	2012	yes	1	2012	1											No														no
female	29	SCH		1998	1998	1	Han	primary school and below	never married					parents	farmer	no		no														No														no
female	50	SCH		2005	2005	1	Han	primary school and below	married/remarried		yes	healthy	in liuyang	spouse	farmer	no		no														No														no
female	5	SCH		2004	2004	1	Han	primary school and below	married/remarried		yes	healthy	in liuyang	spouse	farmer	yes		yes	2	2005	1	2007	1									No														yes	1	2007	1
female	59	suspected SCH		1982	2001	1	Han	primary school and below	married/remarried		yes	healthy	in liuyang	spouse	farmer	yes	2001	no														No														no
female	24	SCH		2004	2004	1	Han	primary school and below	married/remarried		yes	healthy	in liuyang	spouse	farmer	yes	2004	no														No														no
female	58	SCH		1996	2000	1	Han	primary school and below	married/remarried		yes	healthy	in liuyang	children	farmer	yes	1996	yes	1	2000	1											No														yes	2	2000	1
female	56	SCH	yes	1982	1982	1	Han	primary school and below	married/remarried	1	yes	healthy	in liuyang	self	farmer	no		yes	3	1984	1	1995	1	2009	1							No														no
male	44	SCH	yes	1988	1988	1	Han	middle school	never married					parents	farmer	yes	1988	no														No														no
female	49	SCH	yes	1982	1982	1	Han	high school	widowed							yes	1982	yes	2	1982	1	1983	1									No														no
male	23	SCH	yes	2007	2007	1	Han	middle school	never married					parents	farmer	no		yes	2	2007	2											No														no
male	49	SCH	yes	1993	1993	1	Han	middle school	married/remarried	1	yes	healthy	in liuyang	spouse	farmer	no		yes	2	1993	1	2001	1									No														no
female	44	SCH	yes	1998	1998	1	Han	junior college	married/remarried	1	yes	healthy	in liuyang	self	nonfarmer	no		yes	3	1988	2											No														no
female	50	SCH	yes	1983	1983	1	Han	high school	married/remarried	1	yes	healthy	in liuyang	spouse	farmer	no		yes	3	1983	1	1995	1	2003	1							No														yes	3	1983	1
male	52	SCH	yes	2007	2007	1	Han	primary school and below	married/remarried	1	yes	healthy	in liuyang	spouse	farmer	no		yes	3	2010	2	2009	1									No														no
female	45	SCH	yes	1997	1997	1	Han	primary school and below	married/remarried	1	yes	healthy	in liuyang	spouse	farmer	yes	1992	yes	3	1997	1	1998	1	2001	1							No														yes	8	1997	2
male	43	SCH	yes	2001	2001		Han	primary school and below	married/remarried	1	yes	healthy	in liuyang	spouse	farmer			no														No														no
female	57	SCH	yes	1978	1978	1	Han	primary school and below	widowed					children	nonfarmer	yes		yes	3	1978	1	1979	2									No														yes	1	1980	1
female	44			2004	2004	1	Han		married/remarried	1	yes		in liuyang	spouse				yes	3	2004	1	2006	1	2009	1							No														yes
female	27	SCH	yes	2005	2005	1	Han	middle school	divorced					parents	farmer	yes	2005	yes	4	2005	1	2008	2	2009	1							No														no
male	35	SCH	yes	2008	2008	1	Han		married/remarried	1	yes	healthy	in liuyang	parents	farmer	yes	2008	yes	4	2008	2	2009	1	2011	1							No														no
female	44	SCH	yes	2007	2007	1	Han	primary school and below	married/remarried	1	yes	healthy	in liuyang	spouse	nonfarmer	yes	2007	yes	10	2007	2	2008	3	2009	1	2010	2	2011	2			No														no
male	60	epileptic disorder	no	1994	1994		Han	primary school and below	married/remarried	1	yes	healthy	in liuyang	children	nonfarmer	yes	1982	yes	2	1994	1	2002	1									No														no
male	46	SCH	yes	1995	1995	1	Han	high school	never married					siblings	nonfarmer			yes	1	2010	1											No														no
female	29	SCH	yes	2002	2002	1	Han	high school	married/remarried	1	yes	healthy	in liuyang	spouse	nonfarmer	no		yes	3	2008	1	2004	1	2009	1							No														no
female	69	SCH	yes			1	Han
female	39	SCH	yes	1993	1993	1	Han	primary school and below	married/remarried	1	yes	healthy	in liuyang		farmer	no		yes	2	1993	1	1998	1									No														no
male	28	SCH	yes	2003	2003	1	Han	middle school	never married					parents	nonfarmer	no		yes	1	2003	1											No														yes	2	2005	1
female	56	SCH	yes	1984	1984	1	Han	primary school and below	married/remarried	1	yes	healthy	in liuyang	spouse	farmer	no		yes	3	1984	1	2009	1	1995	1							No														no
female	30	epileptic disorder	yes	1985	1985	1	Han	primary school and below	married/remarried		yes	disabled	in liuyang	spouse	farmer	no		yes	3	1985	1	2001	1	2005	1							No														yes	2	2001	2
female	5	SCH	yes	2004	2004	1	Han	primary school and below	widowed					children	farmer	no		no														No														no
female	40	affective disorder	no	2001	2001	1	Han		married/remarried	1	yes	healthy	in liuyang	spouse	farmer	no		no														No														no
male	14	epileptic disorder	no	2002	2002	1	Han	primary school and below	never married					parents	student	yes	2012	yes	5	2002	3	2006	2									No														no
male	46	epileptic disorder	no	1998	1998	1	Han	primary school and below	married/remarried		yes	disabled	in liuyang	siblings	farmer	no		no														No														no
female	48	SCH	yes	1995	1996	1	Han	middle school	married/remarried	1	yes	healthy		spouse	farmer	no		yes	3	2011	3											No														no
female	29	SCH	yes	1995	1995	1	Han	primary school and below	never married					parents	farmer	yes	1999	no														No														no
female	44	SCH	yes	2000	2000	1	Han	primary school and below	married/remarried	1				spouse				yes	2	2000	1	2009	1									No														no
male	35	SCH	yes	1992	1992	1	Han	middle school	never married					parents	farmer	yes	1992	yes	3	2008	2											No														no
female	20	SCH	yes	2009	2009	1	Han	middle school	never married					siblings	nonfarmer	no		yes	1	2010	1											No														no
female	41	SCH	yes	1980	1981	1	Han	primary school and below	never married					parents	farmer	yes	1987	yes	3	2001	2	2002	1									No														no
female	34	SCH	yes	2007	2007	1	Han											no														No														no
male	63	SCH	yes	2000	2000	1	Han	high school	married/remarried		yes	healthy	in liuyang	spouse	nonfarmer			yes	1	2007	1											No														no
female	36	SCH	yes	1998	1998	1	Han	primary school and below	never married					self	farmer			no														No														no
female	45	SCH	yes	1986	1986	1	Han	primary school and below	married/remarried	1	yes		in liuyang	spouse	farmer	yes	1986	yes	1	2011	1											No														no
male	23	SCH	yes	2009	2009	1	Han	middle school	never married					parents	farmer	no		yes	7	2006	3	2007	4									No														no
female	31	SCH	yes	2002	2002	1	Han	primary school and below	never married									yes	1	2002	1											No														no
male	49	SCH	yes	2006	2006	1	Han	high school	married/remarried	1	yes	healthy	in liuyang	spouse	farmer	no		yes		2008	1	2009	1									No														yes		2008	1
female	69	SCH	yes	1967	1968	1	Han	primary school and below	married/remarried	1	yes	healthy	in liuyang	children	farmer	yes	1968	no														No														no
female	43	SCH	yes	1980	1980	1	Han	primary school and below	married/remarried	1	yes	healthy	in liuyang	spouse	farmer	yes	1980	yes	3	2009	3											No														no
female	81	SCH	yes	1956	1960	1	Han	primary school and below	widowed					children	farmer	yes	1960	no														No														no
female	39	SCH	yes	1976	1977	1	Han	primary school and below	never married					parents	farmer	no		yes	1	2009	2											No														no
male	20	epileptic disorder	no	2004	2004	1	Han	middle school	never married					parents				yes	1	2004	1											No														yes	100
male	38	SCH	yes	2003	2003	1	Han	middle school	never married					parents	farmer			yes	23	2011	11	2012	12									No														no
male	59	epileptic disorder	no	1963	1963	1	Han	primary school and below	married/remarried	1	yes	disabled	in liuyang					yes	1	1963	1
male	63	epileptic disorder	no	1961	1964	1	Han	primary school and below	divorced		yes	healthy	in liuyang		farmer			no														No														no
male	57	SCH	yes	1984	1984	1	Han	primary school and below	never married					relatives	farmer			no														No														no
female	41	SCH	yes			1	Han	middle school	married/remarried	1	yes	healthy	in liuyang		farmer	no		yes	2													No														no
female	47	SCH		1992	1992	1	Han	middle school	married/remarried		yes	healthy	in liuyang	spouse	farmer	no		yes	2	1994	2											No														yes	28	1994	3
female	42			1998	2006	1	Han		married/remarried		yes	healthy		self	farmer	no		yes	3	2006	1	2007	1	2011	1							No														no
female	48	SCH					Han	middle school	widowed					self	farmer	no		yes	3	1987	2	1994	1									No														no
female	41	SCH		2005	2006	1	Han	primary school and below	married/remarried		yes	healthy	in liuyang	self	farmer	no		no														No														no
female	56	SCH		1990	1990	1	Han	primary school and below	married/remarried		yes	healthy		spouse	farmer	yes		no														No														no
male	30	SCH		2004	2006	1	Han	middle school	never married					self	farmer	no		yes	2	2006	1	2007	1									No														no
male	48	epileptic disorder		1991	1991	1	Han	middle school	married/remarried		yes	healthy	in liuyang	self	farmer	no		no														No														no
female	34	SCH		2002	2006	1	Han	middle school	married/remarried		yes	healthy	in liuyang	spouse	nonfarmer	no		yes	2	2003	1	2006	1									No														no
female	52	SCH		1994	1994	1	Han	primary school and below	married/remarried		yes	healthy		spouse	farmer	no		yes	1	1994	1											Yes	7	1994	7											no
female	37	SCH		2005	2006	1	Han	middle school	divorced					self	farmer			yes	2	2007	1	1998	1									No														no
female	72	SCH		1998	1998	1	Han	primary school and below	married/remarried		yes	disabled		spouse	farmer	no		yes	1	1998	1											No														no
female	31	SCH	yes	2011	2011	1	Han	middle school	married/remarried	1	yes	healthy	in liuyang	spouse	farmer	no		yes	2	2011	1	2012	1									No														no
female	39	epileptic disorder	no	2006	2011	1	Han	primary school and below	married/remarried		yes	healthy	in liuyang	name	farmer	yes		no														No														no
	68	SCH	yes	2003	2008	1	Han	primary school and below	married/remarried		yes		in hunan	spouse	farmer	yes		no														No														no
female	30	SCH	yes	1998	2001	1	Han	primary school and below	married/remarried	2	yes			name	farmer	yes	2006	no														No														yes	5	2006	1
female	41	SCH	yes	1987	1989	1	Han	primary school and below	married/remarried			healthy	in hunan	name	farmer			no														No														yes	10	2012	2
female	21	SCH	yes	1989	2006	1	Han	high school	never married		no			name	student			yes	3													No														yes	2	2008	1
female	48	SCH	yes	1990	2002	1	Han	middle school	married/remarried	1	yes	healthy	in liuyang	spouse	farmer	no		yes	3	2002	1	2004	1	2007	1							No														no
female	46			1986	1990	1	Han	middle school	married/remarried	1	yes	healthy	in liuyang	parents	farmer	no		yes	1	1990	1											No														yes	4	2006	4
female	36			2006	2008	1	Han	primary school and below	married/remarried	1	yes	healthy	in liuyang	spouse	farmer	no		yes	4	2008	1	2009	2	2010	1							Yes	1	2010	1											yes	1	2008	1
female	24	SCH	yes	2007	2007	1	Han	primary school and below	married/remarried	1	yes	healthy	in liuyang	spouse	farmer	no		yes														No														no
female		SCH	yes	2006	2006	1	Han	primary school and below	widowed					self				no														No														yes	2	2010	1
male	50	SCH		1987	1987	1	Han	middle school	never married					parents	farmer	no		yes	6	1987	1	1988	1	1989	1	1991	1	1993	1	1997	1	Yes	1	9871												no
female	61	SCH		1992	1992	1	Han	primary school and below	married/remarried		yes	healthy	in liuyang	spouse	farmer	no		yes	1	1992	1											No														no
male	49	affective disorder		2010	2010	1	Han	middle school	married/remarried		yes	healthy	in liuyang	spouse		no		yes	2	2010	2											No														no
female	49	SCH		2007	2007	1	Han	middle school	married/remarried		yes	healthy	in liuyang	spouse	farmer	no		yes	1	2007	1											No														no
female	70	SCH		1968	1968	1	Han	primary school and below	married/remarried		yes	healthy	in liuyang	spouse	farmer	yes	1968	yes	1	1968	1											No														no
male	5	SCH		2004	2006	1	Han	middle school	married/remarried		yes	healthy	in liuyang	self	nonfarmer	no		yes	1	2006	1											No														no
male	68	SCH		1989	1989	1	Han	primary school and below	married/remarried		yes	healthy	in liuyang	spouse	farmer	no		yes	1	1989	1											No														no
male	5	SCH	yes	1982	1982	1	Han	primary school and below	married/remarried	1	yes	healthy	in liuyang	spouse	farmer			no
male	55	SCH	yes	1978	2008	1	Han	primary school and below	married/remarried	1	yes	healthy	in liuyang	name	farmer			yes		2008	1	2009	2	2010	2	2011	2					No														no
male	34	SCH	yes	2000	2000	1	Han	middle school	never married					parents	farmer			yes		2009	2	2011	1									No														no
male	31	SCH	yes	2004	2004	1	Han	middle school	never married					parents	farmer			yes	3	2004	2	2012	1									No														no
male	42	SCH	yes	2001	2001	1	Han	primary school and below	never married					siblings	farmer			yes		2001	1											No														no
male	41	SCH	yes	1984	1984	1	Han	middle school	never married					parents	farmer			yes														No														no
male	65	SCH	yes	1986	1986	1	Han	primary school and below	married/remarried	1	yes	healthy	in liuyang	spouse	farmer			no														No														no
female	38	SCH	yes	2007	2007	1	Han	middle school	married/remarried	1	yes	healthy	in liuyang	spouse	farmer			yes		2011	1	2008	1									No														no
female	38	SCH	yes	1998	1998	1	Han	middle school	married/remarried	1	yes	healthy	in liuyang	spouse	farmer			no														No														no
female	36	SCH		2008	2008	1	Han	primary school and below	married/remarried	1	yes	healthy	in liuyang	self	farmer			yes	1	2009	1											No														no
male	22			2008	2008		Han										2008	yes
female	64	SCH		2001	2011	1	Han	primary school and below	married/remarried	1	yes	healthy	in liuyang	name	farmer			yes	6	2001	1	2002	2	2006	3							No														no
female	43	SCH	yes	1985	1985	1	Han	middle school							farmer			no														No														no
female	73	SCH	yes	1979	1979	1	Han	primary school and below	widowed					children	farmer	no		no														No														no
female	52			1969	1971	1	Han	primary school and below	married/remarried	1	yes	healthy	in liuyang	spouse	farmer	no		no														No														no
female	43					1	Han	primary school and below	married/remarried	1	yes	healthy	in liuyang	spouse	farmer	no		no														No														no
female	33			2008		1	Han							children	farmer			no														No														no
female	41	SCH	yes	1986	1987	1	Han	primary school and below	married/remarried	1	yes	healthy	in liuyang	spouse	farmer	no		no														No														no
female	60			2009		1	Han	primary school and below	married/remarried	1	yes	healthy		spouse	farmer	no		no														No														no
female	37	SCH		2002		1	Han	middle school	married/remarried	1				parents	farmer	yes	2011	yes	3	2002	1	2010	1	2011	1							No														yes	4	2002	3
male	38	epileptic disorder	no	1993	1993	1	Han	middle school	never married					parents	nonfarmer	yes	1993	no														No														no
male	58	suspected SCH	yes			1	Han	high school	never married					parents	farmer	no		yes														No														yes
female	26	SCH	yes	2002	2002	1	Han	middle school	married/remarried		yes	healthy	in liuyang					yes	1	2004	1											No														no
female	50	other disorder	yes	1975	1976	1	Han	primary school and below	divorced					parents	farmer	yes		no														No														no
female	66	suspected SCH	yes	1977	1978	1	Han	primary school and below	never married						farmer	yes	1980	yes	1	1978	1											No														yes	3
female	41	SCH	yes	1990	1993	1	Han	primary school and below	married/remarried		yes	healthy	in liuyang	spouse	farmer	no		yes														No														no
female	46	SCH	yes	1987	1987	1	Han							name				no														No														no
female	46			1995	2000	1	Han	primary school and below	married/remarried	2	no	healthy	in liuyang	spouse	farmer			no														No														no
	25	SCH	yes	2003	2003	1	Han							name	farmer			no														No														no
female	35	SCH	yes	1990	1990	1	Han	middle school	divorced					name	farmer			no														No														no
male	23	affective disorder	no	2005	2007	1	Han	middle school	never married					parents	farmer	yes	2010	yes	1	2007	1											No														no
male	53	SCH	yes	1986	1986	1	Han		married/remarried	1	yes	healthy	in liuyang	spouse				no														No														no
female	36	SCH	yes	1999	1999	1	Han	junior college	married/remarried	1	yes	healthy	in liuyang	spouse	farmer	yes	1999	yes	1	1999	1											No														no
male	65	SCH	yes	1977	1977	1	Han	primary school and below	married/remarried	1	yes	healthy	in liuyang	spouse	farmer	yes	1990	no														No														no
female	28	SCH	yes	2001	2001	1	Han	high school	married/remarried	1	yes	healthy	in liuyang	parents	farmer	yes		yes	1	2001	1											No														no
female	50	SCH	yes	2006	2006	1	Han	middle school	married/remarried	1	yes	healthy	in liuyang		farmer			yes	1	2006	1											No														no
male	33	SCH	yes	2009	2009	1	Han	middle school	never married					parents	farmer	no		yes	1	2009	1											No														yes	2	2009	2
male	21	SCH	yes	2008	2008	1	Han	middle school	never married					parents	farmer	no		no														Yes	2	2008	2											yes		2009	1
male	32	SCH	yes	2002	2002	1	Han	high school	divorced					parents	farmer	yes	2002	yes	7	2008	1	2011	2	2010	1	2009	1	2007	1	2006	1	Yes	1	2010	1											no
male	40	SCH	yes	2003	2003	1	Han	high school	never married					parents	farmer	no		yes		2008	1	2009	1	2010	1	2011	1					No														no
female	5	SCH	yes	2006	2006	1	Han	primary school and below	married/remarried	1	yes	healthy	in liuyang	spouse	farmer	yes	2006	yes	1	2006	1											No														no
female	36	SCH	yes	2000	2004	1	Han	middle school	married/remarried		yes	healthy	in liuyang	spouse	farmer	yes	2003	no														No														yes	2	2007	1
female	58			1995	1998	1	Han	middle school	married/remarried		yes	healthy	in liuyang	spouse	farmer	no		no														No														no
female	72	SCH	yes	1980	1981	1	Han	primary school and below	married/remarried		yes	healthy	in liuyang	children	farmer	yes	1990	no														No														no
male	45	SCH	yes	2000	2001	1	Han	middle school	married/remarried		yes	healthy	in liuyang	spouse	farmer	no		yes	1	2001	1											No														no
female	52	SCH	yes	1990	1993	1	Han	high school	married/remarried		yes	healthy	in liuyang	spouse	farmer	no		no														No														no
female	59			2009	2011	1	Han	primary school and below	married/remarried		yes	healthy	in liuyang	spouse	farmer	no		no														No														no
female	78	affective disorder		1986	1992	1	Han	primary school and below	widowed					children	farmer	yes		yes	3	1998	1	2002	1	2009	1							No														yes	2	2001	1
female	53	affective disorder		1985	1989	1	Han	primary school and below	married/remarried		yes	healthy	in liuyang	spouse	farmer	yes	1995	yes	1	1990	1											Yes	1	1989	1											yes	2	1991	1
female	44			1999	2000		Han	primary school and below	married/remarried		yes	healthy	in liuyang	spouse	farmer	yes	2000	yes	1	2011	1											No														no
male	59	other disorder		2011	2011	1	Han	primary school and below	married/remarried		yes	healthy	in liuyang	spouse	farmer	yes	2011	yes	1	2011	1											Yes	3	2011	3											no
female	32			2009	2009	1	Han		married/remarried		yes	healthy	in liuyang	spouse	farmer			yes	2	2009	2											No														no
female	42	epileptic disorder		1980	1988	1	Han					healthy		spouse	farmer	no		yes	5	1995	1	2000	1	2004	1	2008	1	2010	1			No														yes	10	1995	2
female	59	SCH		1986	1986	1	Han	primary school and below	married/remarried		yes	healthy	in liuyang	spouse	farmer			no														No														no
male	41	SCH		2001	2001	1	Han	primary school and below	never married					parents	farmer	no		yes	1	2001	1											No														no
male	74	affective disorder		2005	2005	1	Han	primary school and below	widowed					children	farmer	yes	2005	no														No														no
female	43	SCH	yes	1989	1989	1	Han	middle school	married/remarried	1	yes	healthy	in liuyang	spouse	farmer	yes	2011	yes	3	1989	1	2002	1	2005	1							No														yes	2	2007	1
male	48	SCH	yes	2010	2010	1	Han	middle school	married/remarried	1	yes	disabled	in liuyang	spouse	farmer	yes	2010	yes	2	2010	1	2011	1									No														no
female	19	SCH	yes	2010	2010	1	Han	primary school and below	never married					parents	student	no		no														No														no
female	41	SCH	yes	1989	1990	1	Han	primary school and below	married/remarried	1	yes	disabled	in liuyang	self	nonfarmer			no														No														no
female	27	SCH	yes	2011	2011	1	Han	primary school and below	married/remarried	1	yes	healthy	in liuyang	parents	farmer	no		no														No														no
female	41	SCH	yes	2003	2003	1	Han	middle school	married/remarried	1	yes	healthy	in liuyang	self	farmer	no		no														No														no
female	44	SCH	yes	2005	2005	1	Han	middle school	married/remarried		yes	healthy	in liuyang	spouse	farmer	yes	2008	yes	2	2008	1	2011	1									No														yes	5	2008	2
male	44	SCH	yes	1998	1998	1	Han	primary school and below	married/remarried	1	yes	disabled	in liuyang		nonfarmer	yes	2005	no														No														no
female	62	SCH	yes	2006	2006	1	Han	primary school and below	never married		yes	healthy	in liuyang	spouse	farmer	no		yes	2	2009	1	2010	1									No														no
female	42	SCH	yes	2011	2011	1	Han	middle school	married/remarried		yes	healthy	in liuyang	spouse	farmer			no														No														no
male	52	other disorder		2010	2011	1	Han	primary school and below	never married					parents	farmer			no														No														no
female	45	SCH	yes			1	Han	middle school	married/remarried		yes	healthy	in liuyang	spouse	farmer			yes	1	2006	1											Yes	1	2008	1											no
female	30	SCH	yes	1995	1995	1	Han	middle school	married/remarried		yes	healthy	in liuyang	spouse	farmer			yes		2005	1											No														yes		2005	1
male	17	epileptic disorder		2001	2001	1	Han	primary school and below	never married					parents			2006	no														No														no
male	56	affective disorder		2002	2002	1	Han	high school	married/remarried		yes	healthy	in liuyang	spouse	nonfarmer	yes	2002	no														No														no
male	41	affective disorder		2005	2005	1	Han	primary school and below	never married					parents	farmer	no			1	2005	1												1	2005	1											no
female	62	affective disorder		1998	1998	1	Han	primary school and below	married/remarried		yes	healthy	in liuyang	spouse	farmer			yes	1	1998	1											No														no
female	42	affective disorder	no	1990	1990	1	Han	middle school	married/remarried		yes	healthy	in liuyang	spouse	farmer	no		yes	2	1990	1	2006	1									No														no
male	62	affective disorder		1990	1990	1	Han	middle school	married/remarried		yes	healthy	in liuyang	spouse	farmer	no		yes	1	1992	1											No														no
female	28	affective disorder	no	2002	2002	1	Han	primary school and below	never married					parents	farmer		2000	no														No														no
male	30	affective disorder		2000	2000	1	Han	primary school and below	never married					self	farmer			yes	1	2000	1											No														yes	2	2000	1
female	28	affective disorder	no	2008	2008	1	Han	high school	never married					parents	farmer			yes	2	2008	1	2012	1									No														no
female	52	affective disorder	no	1992	1992	1	Han	middle school	widowed					children	farmer	no			3	1992	1	1998	1	2000	1							No														no
male	45	affective disorder	no	2008	2008	1	Han	high school	divorced					self	farmer			yes	1	2008	1											No														yes	1	2008	1
male	5	affective disorder	no	1982	1982	1	Han	primary school and below	married/remarried		yes	healthy	in liuyang	spouse	farmer			yes	2	1982	1	2011	1									No														no
male	43	affective disorder	no	1999	1999	1	Han	high school	divorced					parents	farmer			yes	1	1999	1											No														no
male	46	SCH	yes	1992	1992	1	Han	primary school and below	never married					parents	farmer	no		yes	3													No														yes	5
male	28	SCH	yes	1999	1999	1	Han	middle school	never married					parents	farmer	no		no														No														no
female	43	schizoaffective disorder	yes	1986	2006	1	Han	primary school and below	married/remarried	1	yes	healthy	in liuyang	spouse	nonfarmer	yes	2011	yes	4	1986	1	1988	1	1993	1	2004	1					No														yes	2
male	47	SCH	yes	1999	2000	1	Han	primary school and below	never married					parents		no		yes	3	2007	1	2008	1	2009	1							No														yes	3	2007	1
male	46	SCH	yes	1998	2006	1	Han	middle school	never married					parents	nonfarmer	yes		yes	4	1986	1											No														yes	2
male	25	SCH	yes	2002	2007	1	Han	middle school	never married					parents		yes	2011	yes	3	2002	1	2005	1	2009	1							No														no
female	29	affective disorder	no	2007	2008	1	Han	middle school	divorced					self	nonfarmer	yes	2009	yes	4	2007	1	2009	1	2008	1	2011	1					No														yes	1	2009	1
male	30	SCH	yes	2002	2002	1	Han	high school	never married					name	farmer	no		yes	6	2002	1	2004	2	2005	2	2011	1					No														yes
female	75	other disorder		2008	2008	1	Han	primary school and below	married/remarried		yes	healthy	in liuyang	relatives	farmer	no		yes	1	2009	1											No														yes	6	2008	1
male	24	SCH	yes	2001	2001	1	Han	primary school and below	never married					name	farmer	no		yes	1	2006	1											No														no
female	46	SCH			2004	1	Han	middle school	married/remarried		yes	healthy	in liuyang	name	farmer	no		yes	3	2011	1	2004	1	2005	1							No														yes	1	2004	1
female	59	other disorder		2007	2007	1	Han	high school	married/remarried		yes	healthy	in liuyang	name	farmer	no		yes	5	2007	1	2008	1	2009	1	2010	1	2011	1			No														no
male	50	SCH	yes	1993	1993	1	Han	primary school and below	never married					name	farmer	no		yes	1	1993	1											No														yes	1
male	35	SCH	yes	1996	1996	1	Han	primary school and below	never married					parents	farmer			no														No														no
female	28	SCH	yes	1999	2010	1	Han	middle school	married/remarried		yes	healthy	in liuyang	spouse	farmer			yes	5	1999	1	2001	1	2004	1	2000	1	2002	1	2008	1	No														no
female	42	SCH	yes	2002	2010	1	Han						in liuyang		farmer			no														No														no
male	42	SCH	yes	1999	1999	1	Han	primary school and below	never married					parents	farmer			yes	3	2010	1	2009	1	2012	1							No														yes	13	1999	2
female	53			2000	2011	1	Han							spouse				no														No
female	47			2010	2009	1	Han	primary school and below	married/remarried	1				spouse	farmer	yes	2010	yes	9	2009	3	2010	3	2011	3							Yes	6	2010	3	2010	3									yes	2	2010	2
female	42	other disorder	no	2008	2008	1	Han	primary school and below	married/remarried		yes	healthy	in liuyang	spouse	farmer	no		yes		2008	2	2009	2
female	43	suspected SCH		1992	1993	1	Han	primary school and below	married/remarried		yes	healthy	in liuyang	spouse	farmer	no		yes	2	1992	1	1993	1																							yes		2000	360
female	64	SCH	yes	2010	2011	1	Han	primary school and below	married/remarried		yes	healthy	in liuyang	children	farmer
male	39	SCH	yes	2011	2011	1	Han	high school	divorced					parents	nonfarmer	yes	2011	no														No														yes	1	2011	1
male	27		yes	2008	2008	1	Han	primary school and below	never married					parents	farmer	no		yes	1	2008	1											Yes	1	2008	1
male	65	SCH	yes	2004	2004	1	Han	middle school	married/remarried		yes	disabled	in liuyang	spouse	farmer	yes	2004	yes	2	2004	1	2006	1																							yes	2
female	35	SCH	yes	2002	2002	1	Han	primary school and below	live together					spouse	farmer			no														No														no
female	71	SCH	yes	1966	1966	1	Han	middle school	married/remarried	1	yes	healthy	in liuyang	spouse	farmer	yes	1966	yes	10	1966	1	1968	2	1976	1	1980	2	1988	2	1993	2	No														yes	1	1988	1
male	30	epileptic disorder	no	2008	2008	1	Han	high school	married/remarried	1	yes	healthy	outside hunan	spouse	farmer	no		yes	6	2008	2	2009	4									No														no
female	62	SCH	yes	1982	1982	1	Han	primary school and below	married/remarried	1	yes	healthy	in liuyang		farmer	no		no														Yes	2	1986	1	1991	1									yes	1	1986
male	24	mental retardation	no	2011	2011	1	Han	middle school	never married					parents	farmer			no														No														no
male	48	SCH	yes	1987	1987	1	Han	middle school	married/remarried	1	yes	healthy	in liuyang	spouse	farmer	no		yes	1	1988	1											No														no
female	26	SCH	yes	2005	2006	1	Han	high school	never married					parents	farmer	yes	2005	yes	4	2008	1	2009	2	2011	1							No														no
female	60	SCH	yes	1986	1986	1	Han	primary school and below	married/remarried	1	yes	healthy	in liuyang	spouse	farmer			yes	2	1986	1	2011	1									No														no
male	34	mental retardation	no	2007	2007	1	Han	primary school and below	never married					parents	farmer			no														Yes	1	2008	1											yes	1	2007	1
male	63	SCH	yes	1986	1986	1	Han	primary school and below	married/remarried	1	yes	healthy	in liuyang	spouse	farmer	yes	1986	no														No														yes	2	1988	1
female	29	affective disorder	no	2008	2008	1	Han	high school	married/remarried	1	yes	healthy	in liuyang	spouse	farmer	yes	2008	yes	2	2007	1	2008	1									No														no
female	32	SCH	yes	1992	2011	1	Han	primary school and below	never married					parents	farmer			no														No														no
male	27	SCH	yes	2003	2003	1	Han	middle school	never married					self	farmer	yes	2003	no														No														no
male	32	SCH	yes	2001	2003	1	Han	primary school and below	never married					parents	farmer	yes	2004	yes	4	2008	1	2009	1	2011	2							Yes	1	2009	1											yes	2	2001	1
male	38	SCH	yes	2006	2007	1	Han	primary school and below	never married					parents	farmer	yes	2007	yes	4	2008	1	2009	1	2010	1	2011	1					No														no
female	45	SCH	yes	1995	1995	1	Han	primary school and below	married/remarried	1	yes	healthy	in liuyang	spouse	farmer	no		yes	8	2007	1	2008	2	2009	3	2011	2					No														no
male	23	SCH	yes	2000	2000	1	Han	primary school and below	never married					parents	farmer	no		no														No														no
male	29	SCH		2005	2005	1	Han	middle school	never married					parents		yes	2006	yes	7	2005	3	2009	2	2010	2							No														yes	2	2007	1
male	25	SCH		2007	2007	1	Han	primary school and below	never married					parents		yes	2007	yes	10	2008	3	2009	3	2010	3	2011	2					No														yes	5	2009	1
female	45	SCH		2003	2004	1	Han	primary school and below	married/remarried		no	healthy	in liuyang	spouse	farmer	no		yes	6	2004	2	2009	1	2010	2	2011	1					No	0													yes	3	2005	1
female	46	SCH		1982	1986	1	Han	primary school and below	married/remarried	1	yes	healthy	in liuyang	spouse	farmer	yes	1986	yes	16	1986	2	1990	3	1991	4	1995	2	1998	3			No														yes	5	1998	2
male	24	SCH		1999	2000	1	Han	primary school and below	never married					parents	farmer	no		yes	7	2001	2	2002	1	2003	1	2004	1	2007	2			No														yes	8	2002	3
female	50	SCH		1984	2003	1	Han	primary school and below	married/remarried	1	yes	healthy	in liuyang	self	farmer	no		no														No														yes	3	2001	2
female	50	SCH		2004	2010	1	Han	primary school and below	married/remarried	1	yes	healthy	in liuyang	spouse	farmer	no		no														No														no
female	49	SCH		1992	1992	1	Han	primary school and below	married/remarried	1	yes	healthy	in liuyang	name	farmer	no		yes	3	1997	1	2000	2									No														no
male	52	SCH		1990	1990	1	Han	primary school and below	married/remarried	1	yes	healthy	in liuyang	spouse	farmer	no		no														No														no
male	22	SCH		1992	1992	1	Han	middle school	never married					parents	farmer	yes	1996	no														No														no
male	5	SCH		1990	1991	1	Han	primary school and below	married/remarried	1	yes	healthy	in liuyang	spouse	farmer	no		no														Yes	3	1992	1	2008	2									no
male	19	epileptic disorder		1993	1993	1	Han	primary school and below	never married					parents	farmer	yes		no														No														no
female	42	SCH		1982	1982	1	Han	primary school and below	married/remarried		yes	healthy	in liuyang	spouse	farmer	yes		no														No														no
male	75	SCH		1987	1987	1	Han	primary school and below	widowed					children	farmer	no		no														No														no
female	39	affective disorder		2006	2008	1	Han	middle school	married/remarried		yes	healthy	in liuyang	self	nonfarmer			no														No														no
male	61	mental retardation		1985	2010		Han	primary school and below	never married					relatives	farmer	yes	2011	yes	1	2011	1											No														yes	3	2009	1
female	37	SCH		1995	2002	1	Han	primary school and below	married/remarried		yes	healthy	in liuyang	spouse	farmer	no		no														No														no
female	45	epileptic disorder		1990	1990	1	Han	primary school and below	married/remarried		yes	healthy		name	farmer	no		yes	1	2010	1											No														no
female	42	SCH		2003	2003	1	Han		married/remarried		yes	healthy		spouse	farmer	no		yes	1	2004	1											No														yes	10	2004	10
female	41	SCH		1994	1994	1	Han	middle school	married/remarried		yes	healthy	in liuyang	spouse	farmer	yes	2007	yes	1	1994	1											Yes	2	2008	1	2009	1									yes	4	2009	1
male	29	SCH		2000	2006	1	Han	primary school and below	never married					name	farmer	no		yes	2	2000	1	2005	1									No														no
female	41	SCH		1988	1988	1	Han	primary school and below	married/remarried		yes	healthy	in liuyang	spouse	farmer	yes	1998	yes	2	1995	1	2007	1									No														yes	4	1998	1
male	46		yes	1991	1992	1	Han	middle school	married/remarried		yes	healthy	in liuyang	parents	farmer	no		no														No														no
female	52	SCH		1999	2000	1	Han		married/remarried		yes	healthy	in liuyang	self	farmer	no		yes	1	1999	1											No														no
female	84	other disorder		2004	2006	1	Han	primary school and below	divorced					name	farmer	no		no														No														yes	4	2007	1
male	28	other disorder	no	2001	2003	1	Han	primary school and below	never married					parents	farmer			no														No														yes	1	2006	1
female	44	SCH	yes	2005	2005	1	Han	primary school and below	married/remarried	1	yes	healthy	in liuyang	spouse	farmer	no		yes	15	2005	2	2006	3	2007	3	2008	3	2009	2	2010	2	No														no
male	25	SCH	yes	2002	2002	1	Han	primary school and below	never married					name		yes	2002	yes	10	2002	1	2003	2	2005	2	2007	2	2008	2	2009	1	No														no
male	46			2007	2007	1	Han	primary school and below	never married					self	farmer	no		yes	1	2007	1											No														no
female	55	SCH	yes	2004	2004	1	Han	primary school and below	married/remarried	1	yes	healthy	in liuyang	spouse	farmer	no		yes	4	2004	1	2005	2	2009	1							No														no
male	28	SCH	yes	2007	2007	1	Han	high school	never married					parents	farmer	no		yes	1	2011	1											No														no
male	43	SCH		2009	2009	1	Han	primary school and below	never married					parents	farmer	yes	2009	yes		2009	1											No														yes	1	2009	1
female	61	SCH				1	Han	primary school and below	married/remarried		yes	healthy	in liuyang	children	farmer	yes		no														No														no
male	33	SCH		2004	2004	1	Han	primary school and below	never married					parents	farmer	yes		no														No														no
male	33	SCH		2006	2006	1	Han	primary school and below	never married					parents	farmer	yes		yes	1	2006	1											No														no
female	51	affective disorder		1992	1992	1	Han	primary school and below	married/remarried		yes	healthy	in liuyang	spouse	farmer	yes	1992	yes														No														no
female	39	epileptic disorder		2007	2007	1	Han	primary school and below	married/remarried		yes	healthy	in liuyang	spouse	farmer	yes	2007	yes	1	2007	1											No														no
female	49	SCH		2003	2003	1	Han	primary school and below	married/remarried		yes	healthy	in liuyang	spouse	farmer	yes	2003	yes	1	2003	1											No														yes	1	2003	1
female	20	SCH		2010	2010	1	Han	middle school	married/remarried	1	yes	healthy	in liuyang	parents	farmer	no		yes	1	2010	1											No														no
female	60	SCH		1985	1985	1	Han	primary school and below	widowed					children	farmer	yes	1985	yes	1	1985	1											No														no
male	24	SCH		2007	2007	1	Han	middle school	never married					parents	farmer	yes	2007	yes	1	2008	1											No														no
female	49	SCH		2001	2001	1	Han	primary school and below	married/remarried		yes	healthy	in liuyang	spouse	farmer	yes	2001	yes	1	2001	1											No														no
female	61	SCH				1	Han	primary school and below	married/remarried		yes	healthy	in liuyang		farmer			yes	1													No														no
male	42	SCH		2005	2005	1	Han	primary school and below	never married					parents	farmer	yes	2005	yes	1	2005	1											Yes	1	2005	1											yes	4	2005	1
female	70	suspected SCH		1998	1998	1	Han	primary school and below	widowed		yes			name	farmer			yes	4	1998	2	1999	1	2001	1							No														no
female	25	suspected SCH		2008	2008	1	Han	middle school	married/remarried	1	yes	healthy	in liuyang	parents				yes	2	2009		2										No														no
male	35	SCH		2011	2011	1	Han	middle school	never married					parents	farmer	yes	2011	yes	1	2011	1											No														no
female	36	suspected SCH		2007	2007	1	Han	middle school	married/remarried	1	yes	healthy	in liuyang	spouse	farmer			yes	5	2007	3	2008	2									No														yes	3	2007	1
male	27	suspected SCH	no	2001	2001	1	Han	middle school						parents	farmer			yes	2	2002	2											No														no
female	34	suspected SCH	no	2004	2004	1	Han	middle school	married/remarried	1	yes	healthy	in liuyang	relatives	farmer			yes	4	2005	2	2006	2									No														yes	4	2004	2
female	46	SCH	yes	2004	2004	1	Han	middle school	married/remarried	1	yes	healthy	in liuyang	spouse	farmer			yes	1	2008	1
female	28	suspected SCH		2006	2006	1	Han	middle school	married/remarried	1	yes	healthy	in liuyang	parents				no														No														no
female	25	suspected SCH		2004	2005	1	Han	middle school	married/remarried	1	yes	healthy	in liuyang	name		no		yes	7	2006	4	2008	1
male	43	suspected SCH	no	2002	2002	1	Han	middle school	married/remarried	1	yes	healthy	in liuyang	spouse	farmer			yes	1	2002	1											No														no
female	52	suspected SCH		1996	1996	1	Han	primary school and below	married/remarried	1	yes	healthy	in liuyang	relatives	farmer			yes	4	1996	2	2001	1	2003	1							No	16	1996	10	1997	4	2000	2							yes
female	26	SCH	yes	2005	2005	1	Han		married/remarried	1	yes	healthy	in liuyang	spouse	farmer			yes	1	2006	1
male	57	suspected SCH		2001	2001	1	Han	primary school and below	married/remarried	1	yes	healthy	in liuyang	spouse	farmer	no		yes	3	2001	1	2005	2									No														no
female	41	SCH		1971	1972	1	Han	primary school and below	married/remarried		yes	healthy	in liuyang	spouse	farmer	yes	1981	no														No														no
male	48	suspected SCH		1987	1987	1	Han	primary school and below	never married					parents	farmer	yes		yes														No														yes	4	1992	2
male	42	suspected SCH		1994	1994	1	Han	primary school and below	never married					name	farmer	yes	2010	yes	1	1994	1											Yes	1	2006	1											yes	2	2006	2
female	30	affective disorder		2002	2002	1	Han	primary school and below	married/remarried	1	yes	healthy	in liuyang	parents	farmer	no		yes	3	2000	2	2011	1																							yes	1	2000	1
female	20	SCH	yes	2010	2010	1	Han	middle school							farmer			yes	2	2010	1	2011	1
female	55	SCH	yes	1996	1996	1	Han	primary school and below	married/remarried	1	yes	healthy	in liuyang	children	farmer	yes	1996	yes	1													No	0													no	0
female	46	SCH		2008	2009	1	Han	primary school and below	married/remarried		yes	healthy	in liuyang	spouse	nonfarmer	yes		yes	1	2008	1											No														no
male	11	SCH	yes	2011	2011	1	Han	primary school and below	never married					parents	farmer	yes	2011	yes	1	2011	1											No	0													no	0
female	75	other disorder		2000	2004	1	Han	primary school and below	married/remarried		yes	healthy	in liuyang	children	farmer	yes		no														No														no
female	37	SCH		2008	2008	1	Han	primary school and below	married/remarried		yes	healthy	in liuyang	spouse		yes		no														No														no
female	66	affective disorder		2006	2006	1	Han	middle school	married/remarried	1	yes	healthy	in liuyang	spouse	farmer	no		yes	1	2006	1											No	0													no	0
female	31	SCH	yes	2009	2009	1	Han	middle school	married/remarried	1	yes	healthy	in liuyang	spouse	farmer	no		yes	1	2009	1											No	0													no	0
female	46	SCH		1986	1991	1	Han							spouse		yes	1991	yes														No														yes	2
female	50	SCH	yes	1988	1988	1	Han	primary school and below	married/remarried	1	yes	healthy	in liuyang	spouse	farmer	no		no	0													No	0													no	0
female	50	SCH	yes	1991	1991	1	Han		never married					parents	farmer	yes	1991	yes	1													No	0													no	0
female	24	SCH	yes	2006	2006	1	Han	middle school	never married					parents	farmer	no		no	0													No	0													no	0
male	45	SCH	yes	2002	2002	1	Han	middle school	married/remarried	1	yes	healthy	in liuyang	parents	farmer	no		no	0													No	0													no	0
female	34	SCH	yes	2002	2002	1	Han	middle school	married/remarried	1	yes	healthy	in liuyang	spouse	farmer	no		yes	2	2007	1	2011	1									No	0													yes	1	2001	1
female	70	SCH	yes	1989	1989	1	Han	primary school and below	married/remarried	1	yes	healthy	in liuyang	spouse	farmer	no		no	0													No	0													no	0
male	42	SCH		2008	2008	1	Han	primary school and below	divorced					self		yes		no														No														no
female	42	SCH		2008	2008	1	Han	primary school and below	married/remarried		yes	healthy	in liuyang	children	farmer	yes		no														No														no
female	44	SCH		2000	2001	1	Han	primary school and below	never married					spouse	farmer			no														No														no
female	37	SCH	yes	1992	1998	1	Han	middle school	never married					parents	farmer	yes	1997	yes	3	2008	1											Yes	1													yes	1
female	39	SCH	yes	2002	2002	1	Han	middle school	never married						farmer	no		yes	1	2005	1											No	0													no	0
female	64	epileptic disorder				1	Han	middle school	married/remarried	1	yes	healthy	in liuyang	spouse	farmer	no		no	0													No	0													no	0
male	38	SCH	yes	1994	1995	1	Han	primary school and below	never married						farmer	yes	1995	yes	2	2009	1	2011	1									No	0													no	0
female	5	SCH		2008	2009	1	Han	primary school and below	married/remarried		yes	healthy		spouse	farmer			no														No														no
male	66	SCH	yes	1983	1983	1	Han	middle school	married/remarried	1	yes	healthy	in liuyang	spouse	farmer	yes	1983	yes	1													No	0													no	0
female	23	SCH		2007	2007	1	Han	middle school	married/remarried		yes	healthy	in liuyang	spouse		yes	2004	no														No														no
female	42	SCH		1994	1994	1	Han	middle school	married/remarried	1	yes	healthy	in liuyang	spouse	farmer	no		yes	1	1994	1											No														yes	1	1994	1
male	25	SCH		2007	2007	1	Han	high school	never married					parents	farmer	yes		yes	3	2007	1	2009	1									No														no
male	29	affective disorder		2005	2005	1	Han	college and above	never married					parents	nonfarmer	yes	2005	yes	2	2005	1	2012	1									No														no
male	43			1991	1991	1	Han							parents	farmer	no		yes	3	1991	1	1997	1
male	31	SCH		2006	2006	1	Han	high school	never married						farmer	no		no														No														no
male	59	SCH		2005	2005	1	Han	primary school and below	married/remarried		yes	disabled	in liuyang	spouse	farmer	yes	2005	yes	2	2005	1	2006	1									No														no
female	26	SCH		2006	2006	1	Han		married/remarried		yes	healthy	in liuyang	self	farmer	no		yes	1	2006	1											Yes	1	2006	1											yes	1	2006	1
female	31	SCH		2007	2007	1	Han	college and above	married/remarried		yes	healthy	in liuyang	self		no		yes	1	2010	1											No														no
female	30	SCH		1996	1996	1	Han							parents	farmer	yes	1996	yes	3	1995	1	1997	1	1998	1							No														yes	1	1997	1
female	44	SCH		1996	1996	1	Han	middle school	married/remarried		yes	healthy	in liuyang	spouse	farmer	no		yes	5	1996	1	2001	1	2003	1	2005	1	2010	1			Yes	1	1996	1											yes	2	1996	1
female	27	SCH		2002	2002	1	Han	high school	married/remarried		yes	healthy	in liuyang	parents	farmer	no		yes	2	2002	1	2008	1									No														no
female	64	SCH		2009	2009	1	Han	middle school	married/remarried		no	healthy	in liuyang	spouse	farmer			yes	4	2009	1	2010	2	2011	1							No														yes	17	2009	10
female	61			2001	2001	1	Han	primary school and below	married/remarried		yes		in liuyang	spouse	farmer	no		yes	1	2003	1											No														no
female	63	SCH		1995	1995	1	Han	primary school and below	married/remarried	1	yes	healthy	in liuyang	spouse	farmer	no		no														No														no
female	38	SCH		2003	2004	1	Han	middle school	married/remarried	1	yes	healthy	in liuyang	spouse	farmer	no		no														No														no
female	50	SCH	yes			1	Han	primary school and below	married/remarried	1	yes	healthy	in liuyang	spouse	farmer	no		no														No														no
female	58	SCH		1995	1995	1	Han	primary school and below	divorced					children	farmer	yes	1997	no														No														no
female	43	SCH	yes	1993	1993	1	Han	middle school	married/remarried	1	yes	healthy	in liuyang	spouse	farmer	no		yes	4	2006	1	2006	1									No														no
female	57	schizoaffective disorder		1984	1991	1	Han	primary school and below	married/remarried		yes	healthy	in liuyang					no														No														no
female	33	SCH		1999	2000	1	Han	primary school and below	married/remarried		yes	healthy	in liuyang		farmer			no														No														no
female	27	schizoaffective disorder		2005	2007	1	Han	high school	married/remarried		yes	healthy	in liuyang	parents		no		yes	3	2007	2	2010	1									No														no
female	70	SCH		1975	1979	1	Han	primary school and below	married/remarried		yes	healthy	in liuyang	spouse	farmer			yes	5	1984	1	1997	1	2009	1	2010	1	2011	1			No														no
male	43	other disorder		1974	1975	1	Han	primary school and below	never married					parents	farmer			no														No														no
female	27	schizoaffective disorder		2005	2005	1	Han	middle school	married/remarried			healthy	in liuyang	spouse	farmer			yes	1	2005	1											No														no
female	52	SCH	yes	1980	1984	1	Han	primary school and below	married/remarried	1	yes	healthy	in liuyang	spouse	farmer	no		yes	5	1980	1	2000	1	2005	1	2006	1					No														yes	2	1980	1
male	72			1977	1981	1	Han	high school			yes	disabled		children	nonfarmer	yes	1977	yes	3	1978	1	1980	1	2000																						yes	3	1980	1
male	36			2009	2006	1	Han							parents			2000	yes	1													Yes	1													yes	1
male	21	SCH	yes	2006	2006	1	Han	middle school	never married					parents	farmer	yes	2006	yes	1	2006	1											No														yes	1	2007	1
female	28	SCH	yes	2006	2007	1	Han	middle school	never married					parents	farmer	yes	2006	yes	2	2007	1											No														yes	2	2006	1
female	56	SCH	yes	1999	2001	1	Han	primary school and below	married/remarried	1	yes	healthy	in liuyang	spouse	farmer	yes	2001	no														No														no
female	34	SCH		1997	1998	1	Han	primary school and below	married/remarried		yes	healthy	in liuyang	spouse	farmer	no		no														No														no
female	34	SCH	yes	2009	2009	1	Han	primary school and below	never married					parents	farmer	yes	2009	no														No														no
female	56	SCH	yes	1982	1982	1	Han	primary school and below	never married					parents	farmer	yes	1982	no														No														no
female	57	SCH		1989	1990	1	Han	middle school	married/remarried		yes	healthy	in liuyang	spouse	farmer	no		yes	1	1990	1											No														no
male	65	affective disorder	no	2009	2009	1	Han	primary school and below	widowed		yes		in liuyang	self	farmer	no		no														No														no
female	42	affective disorder	no	2009	2009	1	Han	primary school and below	married/remarried	1	yes	healthy	in liuyang	spouse	farmer	no		no														No														no
female	30	SCH		2000	2000	1	Han	primary school and below	married/remarried	1	yes	healthy	in liuyang	parents	farmer	no		no														No														no
female	30	SCH		1989	1989		Han	primary school and below	married/remarried		yes	healthy	in liuyang	parents	farmer	yes	1989	no														No														no
female	20	SCH		2006	2006	1	Han	primary school and below	never married					parents	farmer	no		no														No														no
female	57	SCH		1987	1988	1	Han	primary school and below	married/remarried		yes	healthy	in liuyang	spouse	farmer	no		yes	1	1988	1											No														no
female	74	affective disorder	no	2001	2002	1	Han	primary school and below	married/remarried	1	yes	healthy	in liuyang	children	farmer	no		no														No														no
female	23	SCH		1997	1997	1	Han	primary school and below	married/remarried	1	yes	healthy	in liuyang	parents	farmer	no		no														No														no
female	56	SCH		1989	1990	1	Han	primary school and below	widowed					children	farmer	no		yes	1	1994	1											No														no
male	40	SCH	yes	2003	2003	1	Han	middle school	married/remarried	1	yes	healthy	in liuyang	spouse	farmer	no		no														No														no
male	40			1995	17	1	Han	primary school and below						parents	farmer	yes	1995	yes	2	2006	1	2011	1																									1995	1
female	43	epileptic disorder	yes	1937	1967	1	Han	primary school and below	married/remarried	1	yes	healthy	in liuyang	spouse	farmer	yes	1967	yes		2009	10											Yes	1													yes	1
female	42	SCH	yes			1	Han	primary school and below	married/remarried	1	yes	healthy	in liuyang	spouse	farmer	no		yes	1	2012	1											No														yes	1	2007	1
male	66	affective disorder	no	2009	2010	1	Han	primary school and below	married/remarried	1	yes	healthy	in liuyang	spouse	farmer	no		yes	1													Yes	1													yes	1
female	29	SCH		2002	2002	1	Han	middle school	divorced					parents	farmer	no		yes	1	2008	1											No														no
male	33	SCH	yes	2003	2003	1	Han	middle school	never married					parents	farmer	yes	2003	yes	1	2003	1											No														no
female	40	SCH	yes	2010	2010	1	Han	middle school	married/remarried	1	yes	healthy	in liuyang	spouse	farmer	no		yes	1	2010	1											No														no
male	42			2003	13	1	Han							parents	farmer	yes	2000	yes	2													No														yes	1
female	53	SCH	yes	2002	2005	1	Han	primary school and below	married/remarried	1	yes	healthy	in liuyang	spouse	farmer	yes	2005	yes	2	2005	1	2009	1									Yes	1													yes	2	2004	2
male	56	SCH	yes	2004	2007	1	Han	primary school and below	married/remarried	1	yes	healthy	in liuyang	spouse	farmer	no		yes	1	2011	1											Yes	1													yes	1
female	48	SCH	yes	1997	1998	1	Han	primary school and below	married/remarried	1	yes	healthy	in liuyang	spouse	farmer	yes	2004	no														No														no
female	38	SCH	yes	1996	1997	1	Han	primary school and below	married/remarried	1	yes	healthy	in liuyang	self	farmer	no		no														No														no
male	64	affective disorder	no	1979		1	Han	primary school and below	married/remarried	1	yes	healthy		spouse	farmer	yes	1993	yes	2	2005	1											Yes	1													yes	1
male	43	SCH		1981	1982	1	Han	primary school and below	never married					parents	farmer	no		yes	1	1982	1											No														no
male	60	affective disorder		2002	2004	1	Han	middle school	married/remarried	1	yes	healthy	in liuyang	self	farmer	no		yes	3	2003	1	2004	1									No														no
male	41	SCH	yes	1991	1991	1	Han	primary school and below	never married					parents	farmer	yes				1991	1	1992	1	1994	1							No														yes	1	1992	1
male	59	SCH	yes	2001	2001	1	Han	primary school and below	married/remarried	1	yes	healthy	in liuyang	spouse	farmer	no		yes	1	2011	1											No														no
female	28	SCH	yes	2008	2008	1	Han	middle school	never married					parents	farmer	no		yes	3	2008	1	2009	2									No														no
female	57	SCH	yes	1983	1983		Han	primary school and below	live together		no	healthy	in liuyang	spouse	farmer	no		yes	2																											yes	1
female	27	SCH		2008	2008	1	Han	middle school		2	yes	healthy	in liuyang	parents		yes	2008	no														No														no
female	41	SCH		1990	1991	1	Han		married/remarried			healthy	in liuyang		farmer			no														No														no
male	39	SCH		2008	2008	1	Han	middle school	married/remarried		no	healthy	in liuyang	parents	nonfarmer			no														No														no
female	27	SCH		1991	1992	1	Han	middle school	never married						nonfarmer			no														No														no
male	41	SCH		2008	2008	1	Han	middle school	never married						farmer			yes	4	2010	2	2011	2									No														no
male	36	SCH		2007	2007	1	Han	middle school	never married					parents	farmer			no														No														no
male	55			2007	2007	1	Han	middle school	married/remarried	1	yes	healthy		spouse	farmer	yes	2007	yes	1	2007	1											No	0													no	0
female	48	other disorder		2001	2004	1	Han	primary school and below	married/remarried	1	yes	healthy	in liuyang	spouse	farmer	yes	2001	yes	1	2007	1											No	0													no	0
female	30	epileptic disorder		1998	1999	1	Han	primary school and below						name				no	0													No	0													no	0
male	21	SCH		1998	2000	1	Han	high school	never married					parents	farmer			no														No														no
female	65			1978	2012	1	Han	primary school and below	married/remarried	1	yes	healthy	in liuyang	name	farmer	yes	1978	yes	10													No														no
male	27			2008	2008	1	Han		never married					name		yes	2008	no	0
female	64			1970	1970	1	Han									yes		yes
female	35	SCH	yes	1996	1996	1	Han	high school	never married					name	farmer	yes	1996	yes
female	41	SCH		2009	2009	1	Han	primary school and below	married/remarried	1	yes	healthy	in liuyang	spouse	farmer	no		yes	1	2010	1											No	0													no	0
female	26	SCH		2001	2001	1	Han	middle school	never married					parents	farmer	yes	2001	yes	8	2001	1	2003	1	2005	1	2006	1	2008	2	2011	2	Yes														yes	2	2008	1
female	27						Han	high school	married/remarried	1	yes	healthy	in liuyang	spouse	farmer			yes	5	2005	1	2006	1	2007	1	2008	1	2009	1			Yes	1	2005	1											yes	2	2007	1
female	31			2002	2002	1	Han		married/remarried	1	yes			name				yes	1
male	62	SCH	yes	2008	2012	1	Han							name
female	44	SCH		2006	2006	1	Han	high school							farmer
male	46	SCH	yes	2001	2001	1	Han	high school	married/remarried	1	yes	healthy	in liuyang	parents	farmer	no		yes	2	2001	1	2002	1									No														no
female	61	SCH		1986	1986	1	Han	primary school and below	married/remarried		no	healthy	in liuyang	spouse	farmer	no		yes	2	1987	1	1992	1									Yes	1	1987	1											no
male	40	SCH		2011	2011	1	Han	primary school and below	married/remarried		yes	healthy	in liuyang	spouse	farmer	yes	2011	no														No														no
female	45	SCH		1990	1990	1	Han	primary school and below	widowed						farmer	no		yes	4	1990	1	1991	1	2002	1	2011	1					No														no
female	32	SCH		1998	1998	1	Han	high school	divorced					parents	farmer	no		yes	5	1998	1	1999	1	2005	1	2007	1	2011	1			Yes	4	1998	2	2008	1	2009	1							yes	99	2008	99
male	56	SCH		2007	2007	1	Han	middle school	married/remarried		no	healthy	in liuyang	spouse	farmer	no		yes	1	2007	1											No														no
male	57	SCH		1996	1996	1	Han	middle school	married/remarried		yes	healthy	in liuyang	spouse	nonfarmer	yes	1996	no														No														no
female	33	SCH		1995	1995	1	Han	middle school	widowed					parents	farmer	yes	2000	yes	2	2004	1	2011	1									No														yes	99
female	30	SCH		2005	2005	1	Han	primary school and below	married/remarried		yes	healthy	in liuyang	spouse	farmer	no		yes	3	2006	1	2008	1	2010	1							No														no
male	59	SCH		1989	1989	1	Han	primary school and below	married/remarried		yes	healthy	in liuyang	spouse	farmer	no		yes	2	1989	1	1995	1									No														no
male	28	SCH		2006	2006	1	Han	high school	never married					parents	farmer	yes	2006	yes	3	2008	1	2009	1	2010	1							No														no
male	24	SCH		2001	2001	1	Han	middle school	never married					parents	farmer	yes	2001	yes	1	2003	1											Yes	3													yes	2
male	43			1996	1996	1	Han	primary school and below	married/remarried	1	yes	healthy	in liuyang	spouse	farmer	no		no														No														yes	1	2011	1
male	48			2006	2007	1	Han	middle school	married/remarried	1	yes	healthy	in liuyang	spouse	farmer	no		yes	1	2007	1											No														yes	1
male	22		yes	1998	2004	1	Han	primary school and below	never married					parents	farmer	yes	1998	yes	1	2004	1											No														yes	1	2008	1
male	42		yes	1990	1990	1	Han	middle school	never married	1	yes	healthy	in liuyang	spouse	farmer	no		yes	3	1990	1	2010	1	2011	1							No														no
female	50		yes	1993	1994	1	Han	primary school and below	married/remarried	1	yes	healthy	in liuyang	spouse	farmer	yes	1993	yes	1	1994	1											No														no
female	5		yes	1991	1991	1	Han	primary school and below	married/remarried		yes	healthy	in liuyang	spouse	farmer	yes	1991	no														No														no
female	45		yes	1989	1989	1	Han	primary school and below	married/remarried	1	yes	healthy	in liuyang	spouse	farmer	no		yes	7	1989	1	1991	1	1992	1	1993	1	2004	1	2006	2	No														yes	2	2004	1
female	35		yes	1996	1997	1	Han	primary school and below	divorced					parents	farmer	yes	1996	yes	3	1997	1	1999	1	1999	1							No														yes	1	1996	1
female	39		yes	1989	1989	1	Han	middle school	married/remarried		yes	healthy	in liuyang	spouse	farmer	yes	1989	yes	1	1989	1											No														no
female	46		yes	1994	1995	1	Han	middle school	married/remarried	1	yes	healthy	in liuyang	spouse	farmer	no		yes	3	1995	1	2010	1	2011	1							Yes	1	1996	1											yes	1	1996	1
female	52		yes	1985	1986	1	Han	primary school and below	married/remarried	1	yes	healthy	in liuyang	spouse	farmer	yes	1985	yes	4	1986	1	1987	1	1988	1	1989	1					No														yes	4	1986	1
female	41		yes	1988	1989	1	Han	primary school and below	never married					parents	farmer	yes	1988	yes	3	1989	1	1998	1	2004	1							Yes	1	2002	1												17	1995	2
female	42		yes	1992	1993	1	Han	middle school	divorced					parents	farmer	yes	1993	yes	1	1993	1											No														no
female	30			1997	1997	1	Han	primary school and below	married/remarried	1	yes	healthy	in liuyang	spouse		no																No														no
female	26	SCH		2011	2011	1	Han	middle school	never married					parents	nonfarmer	yes	2011	yes	1	2011	1											Yes	2	2011	2											no
female	64	SCH		1970	1970	1	Han	primary school and below	married/remarried		yes	healthy	in liuyang	spouse	nonfarmer	yes	1970	yes	10	1970	2	1973	2	1976	2	1980	2	1985	2			No														yes	10	1970	2
male	28	SCH		2011	2011	1	Han	primary school and below	never married					parents	nonfarmer	no		yes	1	2011	1											No														no
male	66	SCH		1980	1981	1	Han	primary school and below	married/remarried		yes	healthy	in liuyang	spouse	farmer	no		yes	3	1981	1	1983	1	1986	1							No														yes	4	1981	2
female	37	SCH		2009	2010	1	Han	high school	divorced					parents	nonfarmer	no		yes	2	2011	2											No														yes	4	2010	2
female	61	SCH		2007	2007	1	Han	primary school and below	married/remarried		yes	healthy	in liuyang	spouse	nonfarmer	yes	2006	yes	5	2006	2	2007	2	2009	1							Yes	1	2009	1											yes	2	2007	1
female	37	SCH		2005	2005	1	Han	middle school	married/remarried		yes	healthy	in liuyang	spouse	nonfarmer	no		yes	1	2005	1											No														no
female	34	SCH		2000	2000	1	Han	primary school and below	married/remarried		no	healthy	in liuyang	spouse	nonfarmer	yes	2000	yes	6	2000	2	2003	2	2007	1	2009	1					No														yes	6	2000	2
male	24	SCH		2005	2005	1	Han	primary school and below	never married					parents		yes	2005	no														No														yes	8	2006	3
male	29	SCH		1996	1996	1	Han	middle school	never married					parents	farmer			yes	5	1996	1	2004	1	2005	1	2007	1	2008	1			No														no
female	63	SCH	yes		2005	1	Han	primary school and below	married/remarried		yes	healthy	in liuyang	self
male	32	SCH		2006	2006	1	Han	primary school and below	never married					name	farmer			yes	1	2006	1											No														yes	1	2006	1
female	50		yes	2006	2006	1	Han	primary school and below	married/remarried	1	yes	healthy	in liuyang	name	farmer			no														No														no
female	31	SCH		2011	2011	1	Han		married/remarried	1	yes	healthy	in liuyang	spouse	farmer			no														No														no
male	63			1998		1	Han	primary school and below	married/remarried		yes	healthy	in liuyang	spouse	farmer			yes	1	1998	1											No														no
female	40	SCH		1993	1994	1	Han	primary school and below	married/remarried	1	yes	healthy	in liuyang	spouse	nonfarmer			no														No														no
female	36	SCH	yes	1996	1996	1	Han	middle school	never married					siblings		yes	2003	yes	6	2003	1	2004	2	2008	3																					no
	67					1	Han		widowed					self	farmer			no
female	51			1986			Han	middle school			yes	healthy	in liuyang	spouse	farmer	yes	1986	no																												yes
male	41	SCH		1996	1996	1	Han	primary school and below				disabled			farmer
female	37	SCH				1	Han	primary school and below		2	yes	healthy	in liuyang		farmer			yes	3	2012	3											No														yes	3	2012	3
female	36		yes	1996	1996	1	Han	primary school and below	married/remarried		yes	healthy	in liuyang	spouse	farmer	yes	1996		6	1999	3	1997	2	1996	1							Yes	1	1996	1											yes	3	1996	1
female	37	SCH	yes	2005	2005	1	Han	middle school	married/remarried	1	yes	healthy	in liuyang	spouse	farmer	no		no														No														no	0
male	30	SCH	yes	2008	2008	1	Han	middle school	never married					parents	farmer	no		yes	5	2008	1	2009	1	2010	1	2011	1	2012	1			No	0													no	0
male	61	other disorder	no	1999	1999	1	Han	middle school	married/remarried	1	yes	healthy	in liuyang	spouse	farmer	no		yes	3	1999	1	2010	1	2011	1							No	0													no	0
female	62	other disorder	no	2003	2003	1	Han	middle school	married/remarried		yes	healthy	in liuyang	children	farmer	no		no	0													No	0													no	0
male	46	SCH	yes	1986	1986	1	Han	middle school	married/remarried	1	yes	healthy	in liuyang	spouse	farmer	no		no	0													No	0													no	0
male	32	SCH	yes	2000	2000	1	Han	middle school	married/remarried		yes	healthy	in hunan	parents	farmer	no		no														No														no
male	49	SCH	yes	1987	1987	1	Han	middle school	married/remarried		yes	healthy	in liuyang	siblings	farmer	no		no	0													No	0													no	0
male	19	epileptic disorder	no	2005	2005	1	Han	primary school and below	never married					parents	farmer	yes	2005	no														No														no	0
male	43	SCH		1996	1996	1	Han	primary school and below	never married					name	farmer			yes	4	1992	1	1993	1	1995	1	2011	1					No														no
female	30	SCH		2003	2004	1	Han	primary school and below	married/remarried		yes	healthy	in liuyang		farmer	no		no														No														yes	8	1990	8
female	50	SCH		1969	2006	1	Han	primary school and below	married/remarried		yes	healthy	in liuyang	name	farmer	no		yes	4	1976	1	1978	1	1990	1	1994	1					No														yes	3	1976	1
male	53	SCH		1985	2006	1	Han	primary school and below	never married					parents	farmer			no														No														no
female	48	SCH		1999	1999	1	Han	middle school	married/remarried		no	healthy	in liuyang	spouse	farmer	no		yes	2	1999	1	2010	1									No														no
female	50	SCH		1983	1987	1	Han	primary school and below	married/remarried		no	healthy	in liuyang	name	farmer	no		yes	3	1987	1	1988	1	1989	1							No														no
male	23	SCH		1990	1990	1	Han	primary school and below	never married					name	farmer	no		no														No														yes	1	2002	1
female	42	SCH		1998	1999	1	Han	primary school and below	married/remarried		yes	healthy	in liuyang	spouse	farmer	no		no														No														no
female	68	SCH		2010	2010	1	Han	primary school and below	widowed					children	farmer	no		yes	2	2010	12	2011	1									No														no
female	80			1945	1977	1	Han	primary school and below	widowed					name	farmer	yes	1990	yes	2	1983	1	1989	1									No														no
female	38	SCH		2007	2007	1	Han	middle school	married/remarried		yes	healthy	in liuyang	spouse	nonfarmer	no		yes	1	2007	1											No														yes	1	2007	1
male	48	SCH		1989	1989	1	Han	middle school	married/remarried		yes	healthy	in liuyang	spouse	farmer			yes	3	1989	1	1999	1	2000	1							Yes	1	2000	1											yes	2	1989	1
female	47	schizoaffective disorder		2006	2007	1	Han		married/remarried		yes	healthy	in liuyang		farmer			yes	2	2007	1	2006	1									No														no
male	46	SCH		1984	1984	1	Han		divorced					parents	farmer	no		yes	6	1984	1	1985	1	1989	1	1986	1	1988	1	1990	1	Yes	999	1984		1985		1986		1988		1989		1990		no
male	30	SCH		2002	2006	1	Han	college and above	never married					parents		no		yes	5	2002	1	2003	1	2010	1	2005	1	2011	1			No														no
female	70	affective disorder		1972	2009	1	Han	primary school and below	married/remarried		yes	healthy		self	farmer	no		yes	1	2002	1											No														yes	2	2008	2
female	60	SCH		2004	2006	1	Han		married/remarried		yes	healthy		spouse	farmer	no		yes	1	2007	1											Yes	2	2007												no
female	62	affective disorder		2009	2009	1	Han	primary school and below	live together		yes	healthy	in liuyang	name	farmer	no		no														No														no
male	34	SCH		2012	2012	1	Han	college and above	never married					parents	nonfarmer	yes	2012	yes	2	2012	2											No														yes	1	2012
female	38	other disorder		2010	2010	1	Han	middle school	married/remarried		yes	healthy	in liuyang	spouse	nonfarmer	yes		yes	1	2010	1											No														no
male	47					1	Han
female	48					1	Han	primary school and below
male	28	other disorder		2007	2008	1	Han	middle school	never married					parents	farmer			yes														No														no
male	47	suspected SCH		2000	2000	1	Han	middle school	married/remarried	1	yes	healthy	in liuyang	spouse	farmer	yes		yes														Yes	1	2000	1											no
male	59					1	Han
male	5	affective disorder		2008	2008	1	Han	primary school and below	married/remarried	1	yes	healthy	in liuyang	spouse	farmer	yes		yes	2	2008	1	2010	1									No														no
male	44					1	Han
male	44	suspected SCH				1	Han	high school	never married					siblings	farmer			no														No														no
female	61	SCH	yes	2011	2011	1	Han	primary school and below	married/remarried	1	yes	healthy	in liuyang	spouse	farmer	no		no														No														yes	3	2011	3
female	42	SCH	yes	2000	2000	1	Han	primary school and below	married/remarried	1	yes	healthy	in liuyang	spouse	farmer	no		yes	2	2000	1	2001	1									No														no
female	44	SCH	yes	2000	2000	1	Han	primary school and below	married/remarried	1	yes	healthy	in liuyang	spouse	farmer	yes	1998	yes	2	2005	1	2008	1									No														no
male	43	other disorder	no	1975	1975	1	Han	primary school and below	never married					parents	farmer	yes	1975	yes	1	1979	1											No														yes	3	1980	1
female	26	SCH	yes	2002	2002	1	Han	middle school	married/remarried	1	yes	healthy	in liuyang	parents	farmer	yes	2002	yes	4	2002	1	2003	1	2006	1	2012	1					No														yes	2	2005	1
female	32	SCH	yes	1996	1997	1	Han	middle school	married/remarried	1	yes	healthy	in liuyang	spouse	farmer	no		yes	4	1997	1	2000	1	2006	1	2009	1					Yes	1	2002	1											no
	27	affective disorder		2008	2009	1	Han	middle school	never married					self	farmer			yes	1	2009	1											No														no
male	48	SCH		1992	1992	1	Han	high school	divorced					self	farmer	no		yes	3	2007	1	2008	1	2009	1							No														no
male	56	affective disorder		1977	1977	1	Han	primary school and below	married/remarried		yes	healthy	in liuyang	self	farmer	no		no														No														no
female	41	SCH		1997	1997	1	Han	primary school and below	married/remarried		no	healthy	in liuyang	self	farmer	no		no														No														no
male	39	affective disorder		1991	2000	1	Han	primary school and below	never married					self	farmer	no		no														No														no
female	50	SCH		1987	1987	1	Han	high school	married/remarried		yes	healthy	in liuyang		farmer	no		no														No														no
female	50	affective disorder		2008	2008	1	Han	primary school and below	married/remarried		yes	healthy	in liuyang	self	farmer	no		yes	2	2008	1	2010	1									No														no
male	25			1990	1990	1	Han	primary school and below	never married					parents	farmer	yes	2001	no														No														no
male	24	SCH		2007	2007	1	Han	middle school	never married					parents	farmer	yes	2007	yes	2	2007	1	2009	1									Yes	1	2007	1											yes	1	2009	1
male	36		yes	2000	2001	1	Han	primary school and below	never married					parents	farmer	yes	2000	yes	1	2000	1											No	0													no
female	42		yes	1986	1988	1	Han	primary school and below	married/remarried	1	yes	healthy	in liuyang	spouse	farmer	no		no														No														no
female	42		yes	1995	1996	1	Han	primary school and below	married/remarried	1	yes	healthy	in liuyang	children	farmer	no		no														No														no
female	40		yes	2001	2002	1	Han	junior college	married/remarried	1	yes	healthy	in liuyang	spouse	farmer	no		no														No														no
male	24		yes	2001	2002	1	Han	primary school and below	never married					parents	farmer	no		no														No														no
female	48		yes	2001	2002	1	Han	primary school and below	married/remarried		yes	healthy	in liuyang	spouse	farmer	no		no														No														no
female	55		yes	1983	1984	1	Han	primary school and below	married/remarried	1	yes	healthy	in liuyang	spouse	farmer	no		no														No														no
female	32		yes	2000	2001	1	Han	middle school	never married					self	farmer	no		no														No														no
female	42		yes	1988	1989	1	Han	primary school and below	married/remarried	1	yes	healthy	in liuyang	spouse	farmer	no		no														No														no
female	28		yes	2001	2002	1	Han	primary school and below	married/remarried	1	yes	healthy	in liuyang	spouse	farmer	no		no														No														no
male	28		yes	2001	2002	1	Han	middle school	never married					parents	nonfarmer	no		no														No														no
male	48		yes	1998	1999	1	Han	primary school and below	married/remarried	1	yes	healthy	in liuyang	spouse	farmer	no		yes	3	2008	1	2010	1	2012	1							No														no
male	33		yes	1998	2000	1	Han	primary school and below	married/remarried	1	yes	healthy	in liuyang	self	farmer	no		yes	1	2001												No														no
male	43		yes	1990	1992	1	Han		widowed					self	farmer	no		no														No														no
female	55		yes	1995	1996	1	Han	primary school and below	married/remarried	1	yes	healthy	in liuyang	name	farmer	no		no														No														no
male	26		yes	2001	2002	1	Han	primary school and below	never married					parents	farmer	no		no														No														no
male	30		yes	2000	2001	1	Han	primary school and below	never married					self	farmer	no		no														No														no
male	25		yes	2002	2002	1	Han	middle school	never married					self	farmer	no		no														No														no
male	48		yes	1992	1992	1	Han	primary school and below	married/remarried	1	yes	healthy	in liuyang	spouse	farmer	yes	2003	yes	1	2003	1											No														no
female	58		yes	2012		1	Han	primary school and below	widowed					children	farmer	no		no														No														no
female	47		yes	1999	2000	1	Han	primary school and below	married/remarried	1	yes	healthy	in liuyang	name	farmer	no		no														No														no
male	25	mental retardation		1997	1998	1	Han	primary school and below	never married					parents	farmer	yes	1997	yes	1													No
female	28		yes	2004	2004	1	Han		never married					parents	farmer	no		no														No														no
female	61		yes	1980	1986	1	Han	junior college	married/remarried	1	yes	healthy	in liuyang	children	farmer	no		no														No														no
male	36		yes	1995	1998	1	Han	primary school and below	married/remarried		yes	healthy	in liuyang	spouse	farmer	no		no														No														no
male	40		yes	2002	2003	1	Han	primary school and below	never married					parents	farmer	no		yes	1	2002	1											No														no
female	42	affective disorder				1	Han	middle school	married/remarried			healthy	in liuyang	spouse	farmer	no		no														No														no
male	10	epileptic disorder		2005	2005	1	Han		never married					name				yes	2	2005	1	2006	1									No														no
male	42	SCH				1	Han	primary school and below	never married					name	farmer	yes	1990	yes	1	2011	1											No														no
male	37	SCH	yes	2007	2007	1	Han		never married									yes	1	2007	1											No														yes	1	1987	1
female	35	SCH	yes	2005	2006	1	Han	middle school	never married					name	farmer	yes	2005	no														Yes	1	2000	1											no
male	47	SCH	yes			1	Han	middle school	never married					name	farmer	no		no														No														no
female	45	epileptic disorder		1975	1980	1	Han	primary school and below	married/remarried		no	healthy	in liuyang	name	farmer	yes	1990	no														No														no
male	29	SCH		2005	2005	1	Han	middle school	never married					self	farmer			no														No														no
male	41	other disorder		2010	2010	1	Han	primary school and below	never married					name	farmer			yes	1													No														no
female	35	SCH		2004	2004	1	Han	primary school and below	married/remarried					self	farmer			no														No														no
female	20	SCH		2005	2005	1	Han	primary school and below	never married					name	farmer			no														No														no
female	34	SCH		2010	2010	1	Han	primary school and below	married/remarried					spouse	farmer	no		yes	2	2010	1	2011	1									No														no
female	57	SCH		2005	2005	1	Han	primary school and below	married/remarried					children	farmer			no														No														no
female	39	SCH		2005	2005	1	Han	middle school	married/remarried					spouse	farmer			yes	3	2005	1	2009	1	2012	1							No														yes	1	2012	1
male	30	SCH		2007	2007	1	Han	primary school and below	never married					name	farmer			yes	1	2007	1											No														no
female	59	SCH	yes		2006	1	Han	primary school and below	married/remarried	1	yes	healthy	in liuyang	name	farmer	no		yes	8	1999	1	2008	1									Yes														no
female	46	SCH	yes	1996	2007	1	Han	primary school and below	married/remarried	1	yes	healthy	in liuyang	spouse		no		yes	1	1995	1											No														yes	5	1997
male	38	SCH	yes	1989	1989	1	Han	middle school	never married					parents	nonfarmer	yes	1989	yes	3	1989	1	1992	1	2005	1							Yes	1	92	1											yes	1	2005	1
female	32		yes	2007	2007	1	Han	primary school and below	married/remarried	1	yes	healthy	in liuyang	spouse	farmer			yes	1	2008	1											No														no
female	24	SCH	yes	2006	2006	1	Han
male	39	SCH	yes	1998	1998	1	Han	high school	divorced					name	farmer			yes	5	1998	1	1999	1	2004	1	2006	1	2011	1			No														no
female	53		yes	2007	2007	1	Han	primary school and below	married/remarried	1	yes	healthy	in liuyang	spouse				yes	3	2007	1	2008	1	2011	1							Yes	2	2008	1	2011	1									no
female	57		yes	1991	1991	1	Han	primary school and below	married/remarried	1	yes	healthy	in liuyang	spouse				no														No														yes	2	2006	1
female	41		yes	2006	2006	1	Han	primary school and below	married/remarried	1	yes	healthy	in liuyang	spouse				no														No														no
male	31	epileptic disorder	yes	2010	2010	1	Han	primary school and below	never married					parents				no														No														no
male	32	epileptic disorder	no	1997	1997	1	Han	middle school	never married					parents	farmer			no														No														no
female	32		yes	2001	2001	1	Han		married/remarried	1	yes	healthy	in liuyang	parents	farmer			no														No														no
female	25	SCH	yes	2002	2002	1	Han	middle school	married/remarried	1	yes	healthy	in liuyang	parents	farmer			no														No														no
female	28	suspected SCH	yes	1985	1985	1	Han	primary school and below	never married					parents	farmer			yes	3	1986	1	1988	1	2009	1							No														no
female	32		yes	1995	1995	1	Han	high school	married/remarried	1	yes	healthy	in liuyang	spouse				yes	3	2005	1	2006	1	2010	1							No														yes		2005
female	56		yes	1992	1992	1	Han	primary school and below	married/remarried	1	yes	healthy	in liuyang	spouse	farmer			no														No														no
male	80	SCH	yes	1986	1986	1	Han	primary school and below	married/remarried		yes	healthy	in liuyang	children	farmer			yes		2005	1	2006	1	2007	1	2008	1	2009	1	2011	1	No														yes	1
male	61	suspected SCH	yes	2009	2009	1	Han	primary school and below	married/remarried		yes	healthy	in liuyang	spouse	farmer			no														No														no
female	53		yes	1986	1986	1	Han	primary school and below	married/remarried	1	yes	healthy	in liuyang	spouse				no														No														yes		2005	2
male	36		yes	2006	2006	1	Han	primary school and below	married/remarried	1	yes	healthy	in liuyang	spouse				no														No														no
female	44		yes	1992	1992	1	Han							parents	farmer			no														No														no
male	34		yes	1980	1980	1	Han	primary school and below	never married					parents	farmer			no														No														no
female	69	suspected SCH	yes	1982	1982	1	Han	primary school and below	widowed					children	farmer			yes	3	1982	1	2008	1	2009	1							No														no
female	32	suspected SCH	yes	2008	2010	1	Han	primary school and below	married/remarried		yes	healthy	in liuyang	spouse	farmer	no		yes	1	2010	1											No														no
male	29		yes	2003	2003	1	Han	middle school	married/remarried	1	yes	healthy	in liuyang	spouse	farmer			yes		2010	1	2011	2									No														no
female	36	affective disorder	yes	1976	2010	1	Han	primary school and below	never married					parents	farmer	yes	1976	no														No														no
male	49		yes	1986	1986	1	Han	middle school	divorced					parents	farmer			yes	3	2009	1	2010	1	2011	1							No														yes	3	2005
male	70	SCH	yes	1950		1	Han	primary school and below	never married
female	56		yes	1997	1997	1	Han	primary school and below	divorced					parents	farmer			no														No														no
female	21	other disorder		1999	2003	1	Han	high school	never married					parents	nonfarmer	no		yes	1	2003	1											No														no
male	28			2007	2007	1	Han	junior college	never married					name	farmer	no		yes	1	2007	1											No														yes	5	2007	2
male	65	affective disorder		1995	1995	1	Han	primary school and below	never married							yes		no	0													No	0													no	0
female	5	SCH	yes	1976	1976	1	Han	middle school	married/remarried	2	no	disabled	in liuyang	spouse	farmer			yes	2	1976	1	1978	1									No														yes	20	1976	3
male	41	affective disorder	no	2007	2007	1	Han	middle school	married/remarried	1	yes	healthy	in liuyang	spouse	farmer			yes	6	2007	1	2008	1	2009	1	2010	1	2011	1	2012	1															no
male	28	SCH	yes	2002	2002	1	Han	primary school and below	never married					parents		yes	2004	yes	2	2002	1	2009	1									No														no
female	48	SCH	yes	1982	1982	1	Han	primary school and below	married/remarried	1	yes	healthy	in liuyang	spouse	farmer			no														No														yes	3	1999	1
male	24	epileptic disorder	no			1	Han	primary school and below	never married					parents				no														No														no
female	58	affective disorder		1974	1975	1	Han	primary school and below	live together		yes	healthy	in liuyang	name	farmer	yes	1980	yes	2	1998	1	2010	1									No	0													yes	25	1980	5
male	40	mental retardation	no			1	Han	primary school and below	never married					parents				no														No														yes		2006	1
female	61			1989	1989	1	Han	primary school and below	married/remarried	1	yes	healthy	in liuyang	spouse	farmer			yes	2	1989	1	1990	1									No														no
male	39	epileptic disorder	no	2002	2002	1	Han	primary school and below	never married					siblings				no														No														no
female	58	SCH	yes	1992	1992	0	Nonhan	primary school and below	married/remarried	2	no	disabled	in hunan	spouse	farmer			yes	2	1992	1	2010	1									No														yes	7	2006	1
female	55	SCH	yes	1986	1986	1	Han		married/remarried	1	yes	healthy	in liuyang	spouse	farmer			yes	6	1986	1	1987	1	1988	1	1989	1	1990	2			Yes	1	1986	1											no
female	42	affective disorder		2002	2002	1	Han	primary school and below	live together		yes	healthy	in liuyang	name	farmer			no	0													No	0													no	0
male	43			1985	1985	1	Han	primary school and below	widowed					name	farmer			yes	2	2008	1	2009	1									No														no
female	78	affective disorder		2002	2002	1	Han	primary school and below	married/remarried					name	farmer			no	0													No	0													no	0
male	35			1996	1996	1	Han	primary school and below	never married					parents				yes	3	1996	1	1998	1	2008	1							No														no
female	63	SCH	yes	1984	1984	1	Han	primary school and below	married/remarried	1	yes	healthy	in hunan	spouse	farmer			yes	2	1990	1	1995										No														no
female	63	affective disorder		2000	2000	1	Han	primary school and below	live together		yes	healthy	in liuyang	spouse	farmer			no	0													No	0													no	0
male	78	SCH	yes	1995	1995	1	Han	primary school and below	married/remarried	1	yes	healthy	in liuyang	children	farmer	yes	1995	yes	4	1995	1	1996	1	1998	1	1999	1					No														no
male	60	SCH	yes	1993	1993	1	Han	primary school and below	married/remarried	1	yes	healthy	in liuyang		farmer	no		no														No														no
female	28	SCH	yes	2001	2008	1	Han	middle school	married/remarried	1	yes	healthy	in liuyang	spouse	farmer	yes		yes		2008	1											No														no
female	60	SCH	yes	1980	1980	1	Han	primary school and below	married/remarried	1	yes	healthy	in liuyang	spouse	farmer	yes	1980	yes	1	1980	1											No														yes	4	1980	3
female	60	SCH	yes	1982	1983	1	Han	primary school and below	widowed					children	farmer	no		no														No														no
female	39	epileptic disorder	no			1	Han	primary school and below	never married					parents	farmer	no		no														No														no
female	25	SCH	yes	2008	2009	1	Han	junior college	married/remarried	1	yes	healthy	in liuyang	parents	farmer	yes		no														No														no
female	49	SCH	yes	1998	1998	1	Han	high school	widowed						farmer	no		yes		1999	1											No														no
male	55	SCH	yes	1984	1985	1	Han	primary school and below	divorced					children	farmer	no		no														No														no
female	69	SCH	yes	2005	2005		Han	primary school and below	widowed					children	farmer	no		no														No														no
male	31	epileptic disorder	no	1984	1984	1	Han	primary school and below	never married					relatives	farmer	yes		no														No														no
female	56	SCH	yes	1998	1998	1	Han	primary school and below	married/remarried	1	yes	healthy	in liuyang	spouse	farmer	no		yes	1	2006	1											No														no
female	29	affective disorder	no	2006	2006	1	Han	high school	married/remarried	1	yes	healthy	in liuyang	spouse	farmer	yes	2006	yes	1	2007	1											No														no
female	43	SCH	yes	1981	1981	1	Han	primary school and below	married/remarried	1	yes	healthy	in liuyang	spouse	farmer	no		no														No														yes
male	62	SCH	yes	1982	1982	1	Han	primary school and below	married/remarried	1	yes	healthy	in liuyang	spouse	farmer	yes	2008	yes	1	2012	1											Yes	3	2008	1	2009	1	2009	1							yes
male	40	suspected SCH	no	1992	1992	1	Han	high school	never married					parents		yes	1992	yes	3	1998	1	2002	1	2005	1							No														no
female	40	suspected SCH	no	1980	1980	1	Han	primary school and below	married/remarried	1	yes	healthy	in liuyang	spouse	farmer	yes	1978	no														No														no
male	56	SCH	yes	2003	2003	1	Han	middle school	married/remarried	1	yes	healthy	in liuyang	spouse	farmer			yes	1	2005	1											No														yes	2	2005	2
female	37	SCH	yes	1988	1989	1	Han	primary school and below	married/remarried	2	no	healthy	in liuyang	spouse	farmer	yes		yes	3	1995	1	1998	1	2004	1							Yes	1	1995	1											yes	3	1995	1
female	39	SCH	yes	2001	2001	1	Han	middle school	married/remarried	1	yes	healthy	in liuyang	spouse	farmer	yes	2002	yes	2	2001	1	2003	1									No														no
female	47	SCH	yes	2004	2004	1	Han	middle school	live together		yes			spouse		no		no														No														yes	3
male	19	SCH	yes	1998	1998	1	Han	primary school and below	live together			healthy		spouse				no														No														no
female	52	SCH	yes	1992	1992	1	Han	middle school	live together			healthy	in liuyang	spouse	farmer	no		no														No														yes	2
female	28	SCH	yes	2006	2008	1	Han	middle school	married/remarried	1
male	28	epileptic disorder	no	2004	2007	1	Han	high school	never married					parents				yes	1	2011	1											No														yes
female	37	SCH	yes	1996	2008	1	Han	middle school	married/remarried		yes	healthy	in liuyang	parents	farmer	no		yes	1	2010	1											No														yes
female	28	SCH	yes	2003	2003	1	Han	high school	never married					parents	farmer				5	2004	1							2011	2																	yes	2
female	41	affective disorder	yes	1986	1986	1	Han	middle school	married/remarried		yes	healthy	in liuyang	spouse	farmer	yes	1986		4	1986	1	1992	1	1993	1	1995	1					Yes	2	1993	1	1994	1									yes
male	40	SCH	yes	2010	2011	1	Han	primary school and below	divorced					siblings	farmer	no		yes	5	2010	2	2011	3									No														no
male	66	SCH	yes	1975	1975	1	Han	primary school and below	married/remarried	1	yes	healthy	in liuyang	spouse	farmer	no		no														No														no
female	28	SCH	yes	1998	1998	1	Han	primary school and below	married/remarried	1	yes	healthy	in liuyang	spouse	farmer	no		no														No														no
male	28	SCH	yes	2006	2006	1	Han	primary school and below	never married					parents	farmer			yes	2
female	32	SCH	yes	2010	2010	1	Han	primary school and below	married/remarried	2	no	healthy	in liuyang	spouse	farmer	no		no														No														no
female	37	SCH	yes	2006	2009	1	Han	primary school and below	married/remarried	1	yes	healthy	in liuyang	spouse	farmer	no		yes	2	2001	1	2011	1									Yes	2													yes	3	2006	1
male	22	affective disorder	no	2004	2004	1	Han	high school	never married					parents	farmer	no		yes	1	2010	1											No														no
female	33	SCH	yes	1994	2010	1	Han	middle school	married/remarried	1	yes	healthy	in liuyang	spouse	farmer	no		yes	1	2008	1											No														no
male	23	SCH	yes	2010	2010	1	Han	middle school	never married					name	farmer	no		yes	2	2010	1	2011	1									No														yes	1	2010	1
male	30	SCH	yes	2004	2009	1	Han	high school	married/remarried	1	yes	healthy	in liuyang	parents	farmer	no		no														No														no
male	34	epileptic disorder	no	2007	2008	1	Han	middle school	never married					parents	farmer	no		yes	2	2008	1	2010	1									No														no
female	52	SCH	yes	2001	2001	1	Han	primary school and below	widowed					children	farmer	no		no														No														no
female	55	epileptic disorder	no	2008	2008	1	Han	middle school	married/remarried	1	yes	healthy	in liuyang	spouse	farmer	no		no														No														no
female	55	SCH	yes	1998	2009	1	Han	middle school	married/remarried	1	yes	healthy	in liuyang	spouse				yes	219	1998	1	2002	1									No														no
female	37	SCH	yes	2008	2008	1	Han	middle school	married/remarried	1	yes	healthy	in liuyang	spouse	farmer	no		no														No														no
female	69	SCH	yes	1975	2008	1	Han	primary school and below	married/remarried	1	yes	healthy	in liuyang	children	farmer	no		no														No														no
female	34	mental retardation	no	1988	2008	1	Han		married/remarried	1	yes	healthy	in liuyang	spouse	farmer			no														No														no
female	62	SCH		1980	1982	1	Han	middle school	married/remarried		yes	disabled	in liuyang	spouse	farmer			yes	5	1990	1	1991	1	1997	1	2005	2					No														yes	5	2011	2
female	40	epileptic disorder		1992	2010	1	Han	primary school and below	married/remarried		yes	healthy	in liuyang	spouse		yes	2003	no														No														no
male	38	SCH		2008	2008	1	Han	primary school and below	never married					self	farmer	no		yes	1	2008	1											No														no
male	38	epileptic disorder		1980	1985	1	Han	primary school and below	never married					parents	farmer	yes	1980	no														No														yes	64	2007	12
male	42	SCH		1998	2006	1	Han	middle school	married/remarried		yes	healthy	in liuyang			yes	1998	yes	1	2006	1											No														no
female	57	SCH		1975	2006	1	Han	primary school and below	married/remarried		yes	healthy	in liuyang	spouse	farmer	no		yes	2	2001	2											No														yes	3	1989	2
male	38	SCH		1993	1994	1	Han	primary school and below	married/remarried		no	healthy	in liuyang	parents	farmer	yes	1993	yes	12	1993	1	1994	2	1995	4	1996	2	2006	1	2008	1	No														yes	1	2002	1
male	42	SCH	yes	1995	1996	1	Han	primary school and below	never married					siblings		yes	2000	no														No														yes	10	2006	2
male	47	SCH	yes	2008	2008	1	Han		married/remarried	1	yes	healthy	in liuyang	spouse	farmer	no		yes	1	2008	1											No														no
male	25	SCH	yes	1998	1998	1	Han	primary school and below	never married					parents	farmer	no		no														No														yes	1	2006	1
female	38	SCH	yes	1998	1998	1	Han	middle school	married/remarried	1	yes	healthy	in liuyang	spouse	farmer	no		yes	4	2007	1	2008	1	2010	1	2011	1					No														no
female	5	SCH		1998	1999	1	Han	primary school and below	married/remarried		yes	healthy	in liuyang	spouse	farmer			yes	1	1999	1											No														no
male	29	SCH	yes	2009	2009		Han		never married					parents	farmer			no														No														no
	58						Han
female	50		yes		987	1	Han	middle school	married/remarried	1	yes	healthy	in liuyang	spouse	nonfarmer	no		yes	9	1987	3	2008	1	2009	1	2007	1	2010	1			No														no
female	76	SCH	yes	2006	2006	1	Han	primary school and below	divorced							yes		no														No														no
female	66	SCH	yes	1982	1984	1	Han		widowed					children	farmer			no														No														no
male	36	SCH	yes	2002	2002	1	Han	middle school	never married					parents	farmer			yes	3	2002	1	2005	1	2008	1							No														no
female	49			2010	2011	1	Han	primary school and below	married/remarried	1	yes	healthy	in liuyang	spouse	farmer	no		no														No														no
female	48			2009	2010	1	Han
male	20	SCH	yes	2009	2009	1	Han	middle school	never married					name	farmer			yes	2	2009	2											No														no
female	44	SCH	yes	2005	2005	1	Han	primary school and below	married/remarried		yes	healthy	in liuyang	name	farmer			yes	2	2006	1	2008	1									No														no
female	48	SCH	yes	2007	2009	1	Han	primary school and below			yes	healthy	in liuyang		farmer			yes	1	2008	1											No														yes	5	2007	1
female	30	SCH	yes			1	Han	primary school and below	divorced						nonfarmer			no														No														no
female	68	SCH	yes	2007	2008	1	Han											no														No														no
female	50	SCH	yes	1987	1987	1	Han	middle school			yes	healthy	in liuyang	name	farmer			yes	5	1987	3	1989	2									No														yes	5	1987	2
male	27	SCH		2008	2010	1	Han	primary school and below	never married					parents	student	yes	2009	yes	1	2009	1											No														no
female	40	SCH		2004	2006	1	Han	middle school	married/remarried		yes	healthy		spouse	farmer	no		yes	1	2006	1											No														no
male	46	SCH		1985	2006	1	Han	primary school and below	never married					parents	farmer			yes	1	2011	1											No														yes	1	2009	2
male	22	SCH		2006	2009	1	Han	primary school and below	never married					parents	student	yes	2009	no														No														yes	1	2011	1
male	38	SCH		1996	2009	1	Han	middle school	married/remarried		yes	healthy	in liuyang	spouse	nonfarmer	no		no														No														no
male	12	mental retardation		2003	2005	1	Han	primary school and below	never married					parents		yes	2005	yes	3	2006	1	2007	2									No														no
male	42	SCH		1992	2007	1	Han	primary school and below	never married					parents		yes	1994	no														No														no
male	55	affective disorder		2010	2012	1	Han	primary school and below	widowed					children	farmer	no		no														No														no
male	46	SCH		1987	2006	1	Han	primary school and below	never married					parents	farmer			yes	1	1992	1											No														no
female	31	SCH	yes	2000	2000	1	Han	middle school	never married					parents				yes	4	2000	1	2004	1	2010	1	2011	1					No														no
female	48	SCH	yes	1988	1989	1	Han	middle school	married/remarried	1	yes	disabled	in liuyang	spouse	farmer			yes	10	1988	2	1995	1	1996	1	1998	1	1999	1	2005	1	No														no
female	57	SCH		2000	2000	1	Han	primary school and below	married/remarried		yes	healthy	in liuyang	spouse	farmer	no		no														No														no
female	32	affective disorder		2001	2001	1	Han	primary school and below	never married					name	farmer	no		no														No														no
male	49	SCH		1990	1990	1	Han	middle school	married/remarried		yes	healthy	in liuyang	spouse	farmer	no		yes	1	1990	1											No														no
male	57	affective disorder		2005	2005	1	Han	primary school and below	married/remarried		yes	healthy	in liuyang	spouse	farmer	no		no														No														no
female	38	SCH		2005	2005	1	Han	primary school and below	married/remarried		yes	healthy	in liuyang	spouse	farmer	no		no														No														no
female	41	SCH		1990	2010	1	Han	middle school	married/remarried		yes	healthy	in liuyang	self	farmer			yes	1	2010	1											No														no
female	40	SCH		1982	1982	1	Han	primary school and below	married/remarried		yes	healthy	in liuyang	spouse	farmer		1982	yes	3	1982	1	1985	1	1986	1							No														no
female	72	SCH		1972	1972	1	Han	primary school and below	married/remarried		yes	healthy	in liuyang	spouse	farmer	no		yes	3	1972	1	1973	1	1974	1							No														yes	5	2000	1
male	15	SCH		2007	2007	1	Han	primary school and below	never married					parents	nonfarmer	yes	2007	yes	1	2007	1											No														no
male	32	SCH		2003	2004	1	Han	middle school	never married					parents	farmer	no		yes	3	2003	1	2004	1	2005	1							No														no
female	50	SCH		1996	1996	1	Han	middle school	married/remarried		yes	healthy	in liuyang	parents	farmer	yes	1996	yes	5	1997	1	1998	1	1999	1	1996	1	2011	1			No														no
female	49	SCH		1990	1990	1	Han	primary school and below	married/remarried		yes	healthy	in liuyang	spouse	farmer	yes	1990	no														No														no
male	44	SCH		1987	1988	1	Han	primary school and below	married/remarried		yes	healthy	in liuyang	spouse	farmer	no		yes	1	1988	1											No														yes	4	1986	1
male	61	SCH		1992	1993	1	Han	primary school and below	never married					siblings	farmer	yes	1989	yes	3	1992	1	1994	1	1995	1							No														yes	3	1992	1
female	18	SCH		2006	2011	1	Han	high school	never married					parents	student	yes	2010	yes	1	2011	1											No														no
female	28	affective disorder		2002	2002	1	Han	college and above	married/remarried		yes	healthy	in liuyang	spouse	farmer	yes	2002	yes	5	2002	1	2004	1	2006	1	2005	1	2008	1			No														no
female	49	SCH		1998	1998	1	Han	primary school and below	married/remarried		yes	healthy	in liuyang		farmer	yes	1998	no														No														no
male	60	SCH		1970	1970	1	Han	middle school	married/remarried		yes	healthy	in liuyang	spouse	farmer	yes	2007	yes	7	1970	4	2007	1	2008	1	2009	1					No														no
female	52	SCH		1990	2006	1	Han	primary school and below	married/remarried		yes	healthy	in liuyang	spouse	farmer	no		yes	3	2011	1	2005	1	2000	1							No														yes	12	2006	2
female	42	SCH		1998	2007	1	Han	middle school	married/remarried		yes	healthy	in liuyang	parents	farmer	no		yes	3	2007	1	2010	1	2012	1							Yes	2	2002	1	2011	1									no
male	32	SCH		2004	2004	1	Han	primary school and below	never married					parents	farmer	yes	2004	no														No														yes	99
female	55	SCH		1970	1971	1	Han	primary school and below	never married					parents	nonfarmer	yes	1971	yes	2	1971	1	1985	1									No														yes	1	1973	1
male	35			2006	2006	1	Han	middle school	never married					parents		yes	2006	yes	1	2006	1											No														no
female	49	SCH		1994	1994	1	Han	middle school	married/remarried		yes	healthy	in liuyang	spouse	nonfarmer	no		yes	1	1994	1											No														no
male	42	SCH		1989	1989	1	Han	high school	never married					parents	farmer	yes	1989	yes	6	1989	1	1990	2	1991	2	1992	1					No														no
male	48			2006	2006	1	Han		married/remarried		yes	healthy	in liuyang	spouse	nonfarmer	no		no														No														yes	1	2006	1
female	40	epileptic disorder		1990	1990	1	Han	middle school	married/remarried		yes	healthy	in liuyang	spouse	nonfarmer	no		yes	1	2011	1											No														no
female	60	SCH		1984	1984	1	Han	primary school and below	married/remarried		yes	healthy	in liuyang	spouse	nonfarmer	no		yes	7	1984	1	1985	1	2007	1	2008	1	2010	1	2012	2	No														no
male	31	SCH		1997	1997	1	Han	primary school and below	never married					parents	nonfarmer			yes	2	1997	1	2010	1									No														no
male	57			2002	2002	1	Han	primary school and below	married/remarried		yes	healthy	in liuyang	spouse	farmer	yes	2002	yes	1	2002	1											No														no
male	25	SCH		2002	2002	1	Han		never married					parents		yes	2002	yes	3	2002	1	2003	1	2004	1							No														no
female	62	SCH		1995	1995	1	Han		married/remarried		yes	healthy	in liuyang	spouse	farmer	yes		no														No														no
female	5			2010	2010	1	Han	middle school	married/remarried		yes	healthy	in liuyang	spouse	farmer	yes	2010	yes	1	2010	1											No														no
male	45	suspected SCH		1981	1981	1	Han	middle school	married/remarried		yes	healthy	in liuyang	spouse		yes	1981	yes	5	1981	1	1982	1	1983	1	2006	1	2007	1			No														yes	2	2006	1
male	32	other disorder		2008	2008	1	Han	high school						siblings		no		no														No														no
female	40			2005	2005	1	Han	primary school and below	married/remarried		yes	healthy	in liuyang	spouse	farmer	yes	2005	no														No														no
male	60	SCH		2002	2002	1	Han	middle school	married/remarried		yes	healthy	in liuyang	spouse	nonfarmer	yes	2002	yes	1	2008	1											No														no
male	42	SCH		2002	2002	1	Han	primary school and below	married/remarried		yes	healthy	in liuyang	spouse	farmer	no		yes	1	2002	1											No														no
male	39	SCH		1995	1995	1	Han		married/remarried		yes	healthy	in liuyang	spouse	farmer	no		yes	1	1995	1											No														no
female	43	SCH		1990	1990	1	Han	primary school and below	married/remarried	1	yes	healthy	in liuyang	spouse	farmer	no		yes	1	1991	1											No														no
male	43	SCH		1991	1991	1	Han	middle school	married/remarried		yes	healthy	in liuyang	spouse	farmer	yes	1991	yes	1	1991	1											No														no
female	30	SCH		2002	2002	1	Han	high school	never married					parents	nonfarmer	no		yes	1	2002	1
female	35	SCH		1991	1991	1	Han	junior college	married/remarried		yes	healthy	in liuyang	parents				yes	2	1991	1	1993	1									No														no
male	35			1988	1988	1	Han	primary school and below						parents	nonfarmer	no		yes	2	1988	1	2005	1									No														no
male	43	SCH		1998	1998	1	Han	middle school	married/remarried		yes	healthy	in liuyang	spouse	farmer	yes	1998	yes	3	1998	1	2002	1	2009	1							No														no
male	22	SCH		2005	2005	1	Han	high school	never married					parents	nonfarmer	yes	2005	yes	1	2005	1											No														no
female	61	SCH		1995	1995	1	Han	primary school and below	married/remarried		yes	healthy	in liuyang		farmer	yes		yes	4	1995	1	1996	1	1997	1	2010	1					No														no
female	67	SCH	yes	1991	1991	1	Han	primary school and below	widowed					children		no		yes	3	1991	1	1998	2	2011	1							No														no
male	73					1	Han	primary school and below	widowed					children		yes
male	29	other disorder	no	1994	1994	1	Han	middle school	never married					parents	nonfarmer	no		no														No														no
female		SCH	yes	1996		1	Han	primary school and below	married/remarried	1	yes	healthy	in liuyang	spouse	farmer	yes		no														No														no
female	34	other disorder	no	1998	1998	1	Han	middle school	married/remarried	1	yes	healthy	in liuyang		farmer	no		yes	1	1999	1											No														no
female	44					1	Han	primary school and below	married/remarried	1	yes	healthy	in liuyang	spouse	farmer
male	25					1	Han	middle school	never married							yes																														yes
female	45	SCH	yes	1997	1997	1	Han	primary school and below	married/remarried	1	yes	healthy	in liuyang	spouse	farmer	no		yes	2	1997	2											No														no
female	42	mental retardation	no			1	Han	primary school and below	married/remarried	1	yes	healthy	in liuyang	spouse	farmer			no														No														no
female	45	mental retardation	no	1972		1	Han	primary school and below	married/remarried	1	yes	healthy	in liuyang	spouse	farmer	yes		no														No														no
female	79			1963	1963	1	Han	middle school	married/remarried	1	yes	healthy	in liuyang	name	farmer	yes	1969	yes	2	1963	1	1997	1									No														yes
female	27	SCH	yes	2004	2004	1	Han	middle school	married/remarried	1	yes	healthy	in liuyang	parents	farmer			yes	3	2004	1	2005	1	2011	1							No														no
female	44	SCH	yes	1996	1997	1	Han	middle school	married/remarried	1	yes	healthy	in liuyang	parents	farmer			yes	2	2007	1	2009	1									No														no
male	36	SCH	yes	2009	2009	1	Han		married/remarried	1				parents				yes	1	2009	1											No														no
male	42	SCH	yes	2004	2008	1	Han	primary school and below	never married					parents				yes	1	2008	1											No														no
female	62	SCH	yes	1994	1994	1	Han							name	farmer			yes	2	1994	1	1995	1									No														no
female	38	epileptic disorder	no	1994	1995	1	Han	middle school	married/remarried	1	yes	healthy	in liuyang	parents	farmer			yes	2	1995	1	2004	1									No														no
male	40	SCH	yes	1995	1996	1	Han	primary school and below	never married					parents	farmer			yes	2	2012	1	2010	1									No														no
male	37	SCH	yes	1992	1992	1	Han	middle school	married/remarried	1	yes	healthy	in hunan	spouse	farmer			yes	2	1992	1	2001	1									No														no
female	65	SCH		2003	2003	1	Han	primary school and below	widowed					self	farmer	no		no														No														no
female	49	SCH		1989	1989	1	Han	middle school	married/remarried			disabled	in liuyang	spouse	farmer			yes		2011												No														no
female	46	SCH		2003	2004	1	Han	middle school	married/remarried		yes	healthy	in liuyang	spouse	farmer	yes	2005	yes	1	2011	1											No														no
female	42	SCH		2011	2011	1	Han	middle school	married/remarried		yes	healthy	in liuyang	spouse	farmer	yes	2010	no														No														no
female	33	SCH		1999	2000	1	Han	primary school and below	divorced					parents	farmer	yes	2001	yes	2	2002	1	2006	1									No														yes	1	2006	1
female	34	SCH		2004	2004	1	Han		married/remarried		yes	healthy	in liuyang	spouse	farmer	yes	2005	yes	2	2004	1	2008	1									No														no
female	57	SCH		1998	1998	1	Han	middle school	married/remarried		yes	healthy	in liuyang	spouse	farmer	yes	2001	no														No														no
female	39	SCH		2000	2001	1	Han	primary school and below	married/remarried		yes	healthy	in liuyang	spouse	farmer	yes	2005	no														No														no
male	27	SCH		1990	1990	1	Han	primary school and below	never married					parents	farmer	yes	1990	no														No														yes	3	2006	1
female	30	SCH		2001	2001	1	Han		divorced					parents	farmer	yes	2001	yes	4	2001	2	2005	2									No														yes	2	2001	1
female	52	SCH		1982	1982	1	Han	high school	married/remarried		yes	healthy	in liuyang	spouse	farmer	no		no														No														no
male	68	SCH		1995	1995	1	Han	primary school and below	married/remarried		yes	healthy	in liuyang	spouse	farmer	no		yes	2	1995	1	2001	1									No														no
male	30	SCH		2011	2011	1	Han		married/remarried		yes	healthy		spouse	farmer	yes	2011	yes	1	2011	1											No														no
male	56	SCH		1989	1989	1	Han	primary school and below	married/remarried		yes	healthy	in liuyang		farmer	yes	1989	yes	1	1989	1											Yes														no
male	70	SCH		1975	1976	1	Han	primary school and below	married/remarried		yes	healthy	in liuyang	spouse	farmer	yes	1979	no														No														no
female	25	SCH	yes	2007	2007	1	Han	middle school	married/remarried	1	yes	healthy	in liuyang	parents	farmer	no		yes	2	2007	1	2010	1									No														no
female	63	SCH	yes	1981	1981	1	Han	primary school and below	married/remarried	2	yes	healthy	in liuyang	spouse	farmer	no		no														No														no
male	25	affective disorder	no	2006	2006	1	Han	junior college	never married					parents	nonfarmer	no		yes	1	2006	1											No														no
female	34	SCH	yes	2011	2011	1	Han	high school	married/remarried	1	yes	healthy	in liuyang	spouse	nonfarmer	no		yes	1	2011	1											No														no
male	67	SCH	yes	1990	1990	1	Han	primary school and below	married/remarried	1	no	healthy	in liuyang	spouse	farmer	no		no														No														no
female	37	affective disorder		2008	2008	1	Han	middle school	married/remarried	1	yes	healthy	in liuyang	spouse	farmer	no		yes	2	2008	1	2011	1									No														no
female	63	SCH	yes	2008	2008	1	Han	primary school and below	married/remarried	1	yes	healthy	in liuyang	spouse	farmer	no		yes	1	2006	1											No														no
male	56	SCH	yes	1983	1983	1	Han	middle school	never married					siblings	farmer	yes		no														No														no
female	33	SCH	yes	2008	2008	1	Han	middle school	married/remarried	1	yes	healthy	in liuyang	spouse	nonfarmer	no		yes	1	2009	1
female	31	mental retardation		1998	1998	1	Han	primary school and below	married/remarried	2	yes	healthy	in liuyang	spouse	farmer	no		no														No														no
female	27	SCH	yes	2002	2002	1	Han	high school	married/remarried	1	yes	healthy	in liuyang	spouse	farmer	yes	2002	yes	2	2005	1	2006	1									No														no
male	47	epileptic disorder		1978	1978	1	Han	primary school and below	never married					parents	farmer	no		yes	5	2005	1	2007	1	2010	2							No														no
male	10	epileptic disorder	no	2009	2009	1	Han	primary school and below	never married					parents		no		yes	1	2009	1											No														no
female	48			1986	1987	1	Han				yes	healthy	in liuyang	spouse				yes	4													No														no
female	62	other disorder	no			1	Han		married/remarried		no	healthy	in liuyang	spouse	farmer			no														No														no
female	40		yes	1988	1988	1	Han	primary school and below	married/remarried	1	yes	healthy	in liuyang	spouse	farmer			yes	2	2000	1	2012	1									Yes	1	2004	1											yes	1	2000	1
male	42			1990	1990	1	Han		never married					parents				yes	1	1990	1											Yes	1	1990	1											yes	3	1992	1
female	48			1991	1991	1	Han	middle school	married/remarried		yes	healthy	in liuyang	spouse	farmer			yes	1	1991	1											No														no
female	15					1	Han							relatives
male	62	affective disorder		1970	1981	1	Han	primary school and below	married/remarried		yes	healthy	in liuyang	spouse	farmer	yes	1990	yes	2	1996	1	2005	1									No														yes	2
male	50			2009	2009	1	Han		divorced		yes	healthy		self	farmer			yes	1	2009	1											No														no
	38	suspected SCH	yes	1991	1992	1	Han	junior college	divorced				in liuyang	parents		yes	1992	yes	3	1992	1	1995	1	1998	1							Yes	2													yes	10
male	73			1991	1991	1	Han	middle school	never married					parents				yes	1	1991	1											No														no
female	66	SCH	yes	2008	2009	1	Han	primary school and below	widowed					name	farmer			no	0													No	0													yes	4	2008	2
male	32	other disorder	no			1	Han		never married					parents	farmer			no														No														yes	2	2007	1
male	27	mental retardation	no	1985	1986	1	Han		never married									yes	3	1986	1	1998	1	2011	1							No	0													yes	4	2008	1
female	22	SCH	yes	2009	2010	1	Han	middle school	never married					parents	farmer			yes	1	2011	1											No	0													no	0
female	46	SCH	yes			1	Han	primary school and below	married/remarried	1	yes	healthy	in liuyang	self	farmer			no	0													No	0													no	0
male	49	suspected SCH		1995	1996	1	Han	primary school and below	never married					self	farmer			no	0													No	0													no	0
female	53	affective disorder		1993	1994	1	Han	primary school and below	married/remarried	1	yes	healthy	in liuyang	spouse	farmer	no		yes	5	1993	1	1999	1	2012	3							No	0													no	0
male	24	suspected SCH		2003	2004	1	Han	primary school and below	never married					name	farmer			yes	1	2004	1											Yes	3	2004	2	2005	1									no	0
male	23	SCH	yes	1989	1989	1	Han	primary school and below	never married					parents	farmer	yes
male	36	mental retardation	no	1974	1974	1	Han	primary school and below	never married					parents	farmer			no	0													No	0													yes	1	1990	1
male	9	mental retardation	no	2003	2003	1	Han	primary school and below	never married					parents				yes	2	2003	1	2004	1									No	0													no	0
female	26	SCH	yes	2004	2004	1	Han	high school	never married					parents	farmer	yes	2004	yes	4	2004	1	2005	1	2010	1	2011	1					No														no
female	48	SCH	yes	2003	2003	1	Han	middle school	married/remarried	1	yes	healthy	in liuyang	spouse	farmer	yes	2003	yes	3	2003	1	2004	1	2005	1							No														yes	12	2003	4
female	38	SCH	yes	2002	2002	1	Han	middle school	divorced						farmer	no		yes	1	2012	1											No														no
female	5	epileptic disorder	no	2007	2007	1	Han	primary school and below	married/remarried	1	yes	healthy	in liuyang	spouse	farmer	no		yes	6	2007	2	2008	2	2009	1	2010	1					No														no
female	69	SCH	yes	1989	1989	1	Han	primary school and below	married/remarried	1	yes	healthy	in liuyang	spouse	farmer	no		no														No														no
female	60	SCH	yes	2005	2005	1	Han	primary school and below	married/remarried	1	yes	healthy	in liuyang	spouse	farmer	no		yes	2	2008	1	2009	1									No														no
female	56	SCH	yes	1985	1985	1	Han	middle school	widowed					children	farmer	no		no																												yes	4	1985	1
male	63	SCH	yes	2008	2009	1	Han	middle school	married/remarried	1	yes	healthy	in liuyang	spouse	farmer	no		no														No														no
male	25	SCH	yes	2004	2004	1	Han	middle school	never married					parents	farmer	yes	2004	yes	1	2010	1											No
female	39	SCH	yes	2000	2001	1	Han	middle school	married/remarried		yes		in liuyang	spouse	farmer	no		yes	1	2006	1											No														no
male	31	SCH	yes	2006	2006	1	Han	high school	never married					parents	farmer	yes	2006	yes	4	2006	1	2007	1	2008	1	2009	1					No														yes		2010	2
female	18	SCH	yes	2007	2007	1	Han	middle school						self	farmer	yes	2007	yes	1	2007	1											No														no
male	45	SCH	yes			1	Han	middle school	married/remarried		yes	healthy	in liuyang	parents	farmer			yes	1	2003	1											No														no
male	45	suspected SCH		1998	2002	1	Han	primary school and below	married/remarried		no	healthy	in liuyang	spouse	farmer	yes	1998	yes	4	2002	2	2005	1	2008	1							No														yes	4	2002	1
female	79	SCH	yes	1990	1990	1	Han	middle school	married/remarried	1	yes	healthy	in liuyang	spouse	farmer			no														No														no
female	27	SCH	yes	2002	2002	1	Han	primary school and below	married/remarried		yes	healthy	in liuyang	spouse	farmer	yes		yes	3	2003	1	2009	1	2010	1							No														yes	3	2005	1
female	45	SCH	yes	1991	1991	1	Han	primary school and below	married/remarried	2	no	healthy	in liuyang	spouse	farmer	no		yes	1	2011	1											No														yes
female	46	mental retardation		2002	2003	1	Han	primary school and below	never married					parents	nonfarmer			yes	3	2002	1	2003	1	2004	1							Yes	2	2002	1	2003	1									yes	3	2002	1
female	42	SCH		2006	2008	1	Han							parents	nonfarmer			yes	3	2006	1	2007	1	2008	1							No														no
male	44	SCH		2001	2007	1	Han	primary school and below	never married					parents	nonfarmer	yes		no														No														no
female	38	SCH		2007	2008	1	Han	primary school and below	married/remarried					spouse	nonfarmer			yes	2	2006	1	2007	1									Yes	1	2007	1											yes	2	2007	1
female	30	SCH		2009	2010	1	Han	middle school	never married					parents	nonfarmer			yes	1	2009	1											Yes	1	2009	1											yes	1	2009	1
male	37	SCH		2005	2006	1	Han	primary school and below	never married					parents	nonfarmer			yes	2	2005	1	2006	1									Yes	3	2005	1	2006	1	2008	1							yes	3	2006	1
male	43	SCH		1998	2006	1	Han	primary school and below	never married					parents	nonfarmer			yes	1	2006	1											Yes	3	2002	1	2003	1	2004	1							yes	3	2005	1
male	24	SCH		2002	2002	1	Han	middle school	never married					parents	nonfarmer			yes	3	2002	1	2003	1	2004	1							Yes	2	2003	1	2002	1									yes	3	2002	1
male	51	mental retardation		1990	1998	1	Han	primary school and below	never married					parents	nonfarmer			no														No														no
male	41	SCH		2006	2007	1	Han	middle school	never married					parents	nonfarmer			yes	2	2006	1	2007	1									Yes	2	2001	1	2007	1									yes	3	2005	1
male	44	SCH		2007	2008	1	Han	primary school and below	never married					parents				yes	3	2008	1	2007	1	2009	1							Yes	2	2007	1	2008	1									yes	2	2008	1
male	34	SCH		2001	2007	1	Han	middle school	never married					parents				yes	1	2009	1											Yes	3	2008	1	2009	2									no
female	75	SCH		2006	2007	1	Han	primary school and below	married/remarried		yes	disabled	in liuyang	spouse	nonfarmer			yes	3	2006	1	2007	1	2008	1							No														yes	8	2006	2
female	31	SCH		1992	1993	1	Han	middle school	married/remarried		yes	healthy	in liuyang	spouse	farmer	yes		yes		1993	1											No														no
female	16	SCH		2008	2008	1	Han	primary school and below	never married					parents	student	yes	2008	yes	3	2008	2	2011	1
male	43	epileptic disorder		2000	2000	1	Han	primary school and below	married/remarried			healthy	in liuyang	self	farmer			yes	1	2000	1
male	41	SCH		1990	1990	1	Han	middle school	married/remarried			healthy	in liuyang	self	farmer			yes	2	1990	1	2011	1
male	35	SCH		1997	1997	1	Han	high school	never married					parents	nonfarmer	yes	1997	yes	10	1997	1	1998	1	1999	2	2008	2	2009	2	2011	2															yes	1	2009	1
female	53			2006	2006		Han	primary school and below	widowed									yes	1	2006	1											No														no
male	33	SCH		2008	2008	1	Han	junior college	married/remarried			disabled	in liuyang	parents	farmer			yes	2	2008	2
male	26	paranoid disorder		1999	1999	1	Han	middle school	never married					self	farmer			yes	2	1999	1	2005	1
male	21	epileptic disorder		1991	2008	1	Han	primary school and below	never married
male	31	SCH		2005	2005	1	Han	primary school and below	married/remarried			healthy	in liuyang	parents	farmer			yes	1	2005	1
female	37	SCH		2004		1	Han	primary school and below	married/remarried			healthy	in liuyang	spouse	farmer			yes	3	2004	1	2007	1	2011	1
male	23	SCH		2007	2007	1	Han	middle school	never married					self				yes	4	2007	2	2011	2
male	30	SCH		2008	2008	1	Han	high school	never married					self				yes	2	2008	1	2009	1
male	31	SCH		2006	2006	1	Han	middle school	married/remarried			healthy	in liuyang	spouse	farmer			yes	1	2006	1
female	57	SCH		1986	1986	1	Han	primary school and below	married/remarried		yes	healthy	in liuyang	self	farmer			yes	1	2007	1
female	50	SCH		1990	1990	1	Han	primary school and below	married/remarried			healthy	in liuyang	self	farmer			yes	5	1990	1	1991	1	1992	1	1995	1	1998	1
female	45	SCH		2004	2004	1	Han					healthy	in liuyang	spouse	farmer			yes	3	2004	2	2006	1
male	25		yes	2005	2005	1	Han	middle school	never married					parents		yes	2005	yes	2	2005	1	2009	1									No														yes	1	2008
male	40	epileptic disorder		2000	2000	1	Han		never married				in liuyang	relatives		no		no														No														no
female	45		yes	2004	2004	1	Han		married/remarried	1	yes	healthy	in liuyang	spouse	farmer	no		no														No														no
male	26		yes	2006	2006	1	Han	middle school	never married					parents		yes	2006	no														No														no
male	39		yes	2009		1	Han	primary school and below	never married					parents	nonfarmer	yes	2009	no														No														no
female	37		yes	2006	2006	1	Han	primary school and below	married/remarried	1	yes	healthy	in liuyang	spouse	farmer	no		yes	1	2006	1											No														yes	1	2012	1
male	30		yes	1994	1994	1	Han	primary school and below	never married					relatives	nonfarmer	yes	1994	yes	1	1994	1											No															2	2011	2
male	38		yes	2006	2006	1	Han	middle school	married/remarried	1	yes	healthy	in liuyang	spouse	farmer	no		yes	1	2006	1											No														no
male	22		yes	2007	2007	1	Han	middle school	never married					parents	farmer	no		no														No														no
female	49		yes	1984	1984	1	Han	primary school and below	married/remarried	1	yes	healthy	in liuyang	spouse	farmer	yes	1984	no														No														no
male	55		yes	1982	1982	1	Han	middle school	never married					relatives	farmer	yes		no														No														no
female	38	affective disorder	no	1997	1997	1	Han	middle school	married/remarried		yes	healthy	in liuyang	relatives	farmer	yes	1997	yes	3	1997	1	1999	1	2004	1							Yes		1997	1											no
female	39		yes	2010	2010	1	Han	middle school	married/remarried	1	yes	healthy	in liuyang	self	farmer	yes	2011	yes	1	2010	1											No														no
female	38		yes	1998	1996	1	Han	middle school	married/remarried	1	yes	healthy	in liuyang	spouse	farmer	yes		yes	2	1996	1	2010	1									No														no
female	41		yes	2000	2000	1	Han		married/remarried	1	yes	healthy	in liuyang	spouse		no		yes	1	2001	1											No														no
male	46		yes	1999	1999	1	Han	middle school	married/remarried	1	yes	healthy	in liuyang	self	farmer	no		no														No														no
male	15	suspected SCH		2004	2011	1	Han	primary school and below	never married					relatives	farmer	yes		no														No														no
male	41		yes	1996	1996	1	Han	middle school	never married					parents		yes	2000	yes	1	1997	1											No														no
female	39		yes	1998	1998	1	Han		married/remarried	1	yes	healthy	in liuyang	spouse	farmer	no		yes	2	1998	1	2001	1									No														no
male	62		yes	1974	1974	1	Han		married/remarried	1	yes	healthy	in liuyang	self	farmer	yes	1974	yes	1	2004	1											No														no
female	59	affective disorder	no	1988		1	Han	primary school and below	widowed									no																												no
female	57	SCH	yes	1984	1984	1	Han	primary school and below	widowed					children	farmer			yes	5	1984	1	1985	1	1986	1	1992	1	2006	1																	yes	2
female	70	affective disorder		1980	1980	1	Han	primary school and below	married/remarried	1	yes	healthy	in liuyang	spouse				no														No														yes	1	1985
male	27	SCH	yes	2002	2002	1	Han	middle school	never married					parents				yes	2	2002	1	2003	1									No														no
male	46	SCH	yes	1987	1987	1	Han	middle school	never married					parents				no														No														no
female	22	SCH	yes	2007	2007	1	Han	middle school	married/remarried	1	yes	disabled	in liuyang	spouse	farmer			yes	2	2007	2											No														no
male	58	affective disorder	no	1984		1	Han	primary school and below	married/remarried	1	yes	disabled	in liuyang	spouse	farmer	no		no														No														yes	3	1985	1
male	74	SCH	yes	1973	1973	1	Han	primary school and below	married/remarried	1	yes	healthy	in liuyang	spouse	farmer			yes	3	1973	1	1975	2	1978	3							No														no
female	37					1	Han		never married						farmer			no														No	1
male	32			2002	2002	1	Han	middle school	married/remarried	1	yes	healthy	in liuyang	parents	nonfarmer	no		yes	1	2002	1											No														no
female	55					1	Han	primary school and below	never married						farmer			no														No														no
female	32			1987		1	Han	middle school	never married					parents	farmer			no														No														no
female	37			1999	1999	1	Han	primary school and below	married/remarried	1	yes	healthy	in liuyang	spouse		no		yes	1	2007	1											No														no
female	36			1995		1	Han	middle school	married/remarried	1	yes	healthy	in liuyang	spouse	farmer			yes	1	2008	1											No														no
female	38			2001	2006	1	Han	middle school	married/remarried	1	yes	healthy	in liuyang	spouse		no		yes	8	2011	1	2010	1	2009	1	2008	1	2007	1	2006	1	No														no
female	72	SCH	yes	1971	1979	1	Han	middle school	married/remarried	1	yes	healthy	in liuyang	spouse	nonfarmer			yes	4	1993	2	2009	1	2010	1							Yes	2	1984	2											no
male	51	SCH	yes	1988	1989	1	Han	high school	married/remarried	1	yes	healthy	in liuyang	spouse	nonfarmer	yes	1999	yes	10	1989	2	1990	2	1995	2	1998	2	2002	2			No														no
male	30	SCH	yes	2004	2004	1	Han	junior college	never married					parents	nonfarmer	yes	2004	yes	4	2011	2	2010	1	2004	1							No														no
female	60	SCH	yes	1987	1992	1	Han	primary school and below	married/remarried	1	yes	healthy	in liuyang	spouse	nonfarmer	yes	1987	yes	1	1992	1											No														no
male	56	SCH	yes	1978	1985	1	Han	junior college	married/remarried	1	yes	healthy	in liuyang	spouse	nonfarmer	yes	1980	yes	10	2012	1	2011	1									No														yes	1
female	45	SCH	yes	1989	1989	1	Han	primary school and below	married/remarried	1	yes	healthy	in liuyang	spouse				yes	3	2007	1											No														yes	2
female	63	SCH	yes	1980	1982	1	Han	primary school and below	married/remarried	1	yes	healthy	in liuyang		nonfarmer	yes	1982	yes	5	2008	2	2005	1	2004	1	1982	1					No														no
female	5	SCH	yes	1985	1985	1	Han	middle school	never married	1	yes	healthy	in liuyang	spouse	nonfarmer			yes	2	1985	1	1987	1									No														no
female		SCH	yes	2006	2006	1	Han	middle school	married/remarried		yes	healthy	in liuyang	spouse	farmer	yes	2007	no														No														no
male	39	SCH	yes		1992	1	Han	junior college	never married					parents				yes	1	1998	1											No														yes	3	2001	1
	63	SCH	yes	1972	1972	1	Han	high school						other non-relatives		yes	1972	yes		1978	3											No														no
male	50	epileptic disorder		1992	1992	1	Han	primary school and below	never married					parents	farmer			no														No														no
male	32	other disorder		2000	2002	1	Han	middle school	never married					parents	farmer	no		yes	2	2002	1	2005	1									No														yes	538	1998	2
female	60	affective disorder		2003	2003	1	Han		live together		yes	healthy	in liuyang	spouse	farmer	yes	2003	yes	2	2003	2											Yes	800	2003	365	2004	365	2005	60							no
male	25	SCH		2005	2005	1	Han	high school	never married					parents	farmer	yes	2005	yes	8	2005	2	2006	2	2007	1	2008	1	2009	1	2010	1	Yes	1	2010	1											yes	5	2005	1
female	53	SCH		2002	2002	1	Han	primary school and below	married/remarried		no	healthy	in liuyang	spouse	farmer	yes	2002	yes	2	2003	1	2004	1									No														no
male	62	affective disorder		2010	2010	1	Han	primary school and below	married/remarried		yes	healthy	in liuyang	spouse	nonfarmer	yes	2010	no														No														no
male	48	SCH		1992	1992	1	Han	high school	widowed					siblings	farmer	yes	1992	yes	22	2011	3	2010	2	2007	17							Yes	12	2009	5	2008	3	2007	4							yes	150
female	44	SCH		2008	2008	1	Han	middle school	married/remarried		yes	healthy	in liuyang	self	farmer			yes	4	2009	2	2008	2									No														no
female	32	SCH		2003	2003	1	Han		married/remarried		yes	healthy	in liuyang	self	farmer	no		no														No														no
female	52	SCH		1990	1990	1	Han	primary school and below	married/remarried		yes	healthy	in liuyang	spouse	farmer	no		yes	4	2010	1	2000	2	2009	1							No														yes	4	1998	4
female	40	SCH		2004	2004	1	Han	primary school and below	married/remarried	1	yes	healthy	in liuyang	spouse	farmer	yes	2004	yes	1	2005	1											No														yes	1	2004	1
female	62	SCH		1989	2006	1	Han		widowed						farmer	no		no														No														no
male	5	SCH		1986	1986	1	Han	middle school	married/remarried		yes	healthy	in liuyang	self	nonfarmer			yes	1	2006	1											No														no
female	62	SCH		1976	1976	1	Han		married/remarried		yes	healthy	in liuyang	spouse	farmer	yes	2006	no														Yes	2	1984	1	1990	1									no
female	50	SCH		1988	1988	1	Han	primary school and below	married/remarried		yes	healthy	in liuyang	self	farmer	no		yes	4	1988	1	2001	1	1995	2							No														no
male	43	SCH	yes	1991	1991	1	Han	middle school	never married					parents	farmer	yes	1991	yes	5	1991	2	1992	2	1995	1							Yes	2	1991	1	1992	1									yes	6	1991	3
female	45	SCH	yes	1986	1986	1	Han	primary school and below	married/remarried	1	yes	healthy	in liuyang	spouse	farmer			yes	4	1986	2	1987	1	1988	1							Yes	2	1986	1	1987	1									yes	3	1986	2
female	61	SCH	yes	1995	1995	1	Han	primary school and below	married/remarried	1	yes	healthy		spouse	farmer			yes	4	1995	1	1996	1	1997	1	1998	1					Yes	1	1996	1											yes	6	1995	2
male	29	SCH	yes	1999	1999	1	Han	high school	never married					name	farmer	yes	1999	yes	4	1999	1	2000	1	2002	1	2004	1					Yes	1	2002	1											yes	3	2000	1
male	59	SCH	yes	2001	2001	1	Han	primary school and below	never married					siblings	farmer			yes	1	2002	1											No														no
female	30	SCH	yes	1997	1997	1	Han							parents	farmer			yes	3	1997	1	1998	1	1999	1							Yes	2	1997	1	1998	1									yes	5	1997	2
male	46	SCH	yes	1992	1992	1	Han	high school	married/remarried	1	yes	healthy	in liuyang	spouse	farmer			yes	4	1992	2	1994	1	1995	1	1993	1					Yes	1	1993	1											yes	3	1992	2
female	33	affective disorder		2007	2010	1	Han	primary school and below	married/remarried	1	yes	healthy	in liuyang	spouse	farmer	yes	2007	yes	3	2008	1	2011	1	2009	1							No														yes	1	2011	1
female	30	SCH	yes	2008		1	Han	middle school	live together		yes	healthy	in liuyang	parents	farmer	no		yes	3	2008	2	2009	1									No														yes	2	2008	1
female	22	suspected SCH		2008	2008	1	Han	primary school and below	never married				in liuyang	parents	farmer			yes	4	2008	2	2009	2									No														yes	4	2008	2
female	33	suspected SCH		2010	2010	1	Han	junior college	never married		no			parents	farmer	no		yes	1	2010	1											No														no
female	35	suspected SCH		2009	2009	1	Han	middle school	never married					parents	farmer			yes	3	2009	2	2010	1									No
female	40	SCH	yes	2008	2008	1	Han	primary school and below	live together		yes	healthy		spouse	farmer	no		yes	1	2008	1											No														no
male	33	SCH	yes	2008	2009	1	Han	primary school and below	never married					parents	farmer	no		no														No														no
female	67	SCH	yes	1980	1981	1	Han	high school	married/remarried					spouse	nonfarmer	no		no														No														no
female	37	epileptic disorder	no	1985	1985	1	Han	primary school and below	married/remarried	1	yes	healthy	in liuyang	spouse	farmer	no		yes	1	2010	1											No														no
female	56	epileptic disorder	no	1998	1998	1	Han	primary school and below	married/remarried	1	yes	healthy	in liuyang	spouse	farmer	no		no														No														no
female	43	SCH		1975	2011	1	Han							name	farmer	yes	1974	yes	5	2010	3	2011	2									Yes	1	1995	1											yes	16	1991	3
male	36	epileptic disorder		1987	1987	1	Han		never married					parents	farmer	yes		yes	10	1987	3	1989	2	1993	1	1994	1	1996	2			No														no
female	46	SCH		1980	2006	1	Han	primary school and below	married/remarried		yes	healthy	in liuyang	self	farmer	no		no														Yes	30	2005												no
female	41			2011	2011	1	Han	middle school	married/remarried		yes	healthy	in liuyang	name		no		no														No														no
female	37	SCH		1992	1993	1	Han	primary school and below	married/remarried		yes	healthy	in hunan	spouse	farmer			yes	3	1993	1	1995	2									No														no
female	39	SCH		1982	1982	1	Han	middle school	married/remarried		yes	healthy	in liuyang	spouse	farmer	no		yes	2	1982	1	1984	1									No														no
female	31	epileptic disorder		1998	1999	1	Han	primary school and below	live together		no	healthy	in liuyang	spouse	farmer	no		yes	3	2003	2	2005	1									No														no
female	48	mental retardation		1998	1999	1	Han	middle school	married/remarried		yes	healthy	in liuyang	name	farmer			yes	3	1998	2	1999	1									No														no
male	49	SCH		1987	1988	1	Han							name				no														Yes	1	1989	1											yes	16	1987	2
female	21	SCH		1996	2007	1	Han	primary school and below	never married					self	farmer	no		yes	3	2007	1	1996	1	2000	1							No														yes	3	2004	3
female	40	SCH	yes	1980	1981	1	Han	primary school and below	married/remarried	1	yes	healthy	in liuyang	spouse	farmer	no		yes	1	2008	1											No														yes	34	2007	6
male	24	SCH	yes	2006	2006	1	Han	middle school	never married					parents	farmer	no		yes	1	2009	1											Yes	2	2009	1	2010	1									yes	16	2008	3
male	37	affective disorder	no	1995	1996	1	Han	primary school and below	divorced					siblings	farmer	no		yes	1	2007	1											No														yes		2006	5
female	46	affective disorder	no	1987	1987	1	Han	middle school	married/remarried	1	yes	healthy	in liuyang	spouse	farmer	no		yes	1	2007	1											Yes	1	2007	1											yes	1	2007	1
female	48	SCH	yes	2010	2010	1	Han	primary school and below	married/remarried	1	yes	healthy		spouse	farmer	no		yes	1	2010	1											No	0													no	0
male	51	SCH	yes	2011	2012	1	Han	primary school and below						parents	farmer	no		no	0													No	0													yes	2	2012	2
male	41	mental retardation		1997		1	Han	middle school						parents	farmer	yes	1998	no	0													No	0													no	0
female	35	SCH	yes	1999	1999	1	Han	primary school and below	married/remarried	1	yes	healthy	in liuyang	spouse	farmer			yes	4	2005	1	2006	1	2007	1	2008	1					No	0													yes	2	2005	1
female	39	SCH	yes	1996		1	Han	primary school and below	married/remarried	1	yes	healthy	in liuyang	spouse		no		yes	2	1987	1											Yes	1	1987	1											no	0
male	35			1984	2012	1	Han		never married					parents	farmer	yes	1984	yes	1	2012	1											No	0													yes	9	2005
female	39	affective disorder		1997	1997	1	Han	middle school	married/remarried	1	yes	healthy	in liuyang	spouse	farmer	yes	2000	yes	8	2011	1	2009	3	2007	1	2010	1	2008	1	2006	1	No														yes	2	2010	1
female	34	affective disorder		1990	1990	1	Han	primary school and below	married/remarried	1	yes	healthy	in liuyang	spouse	farmer	yes	1990	yes	1	1990	1											No														yes	2	2011	1
female	43	suspected SCH		1997	1997	1	Han	middle school	married/remarried	1	yes	healthy	in liuyang	spouse	farmer	yes	1998	yes		2006	1											No														yes	17	2005	3
female	56	suspected SCH		1995	1995	1	Han	primary school and below	married/remarried	1	yes	healthy	in liuyang	spouse	farmer	yes	2000	yes	1	1995	1											No														no
male	51	affective disorder		1987	1987	1	Han	primary school and below	divorced					parents	farmer	yes	1987	yes	3	1988	1	1990	1	1989	1							No														no
male	43	SCH	yes	1988	1988	1	Han	primary school and below	never married					parents	nonfarmer	yes	1986	yes	1	2008	1											No														no
female	34	affective disorder		2002	2002	1	Han	middle school	married/remarried	1	yes	healthy	in liuyang	spouse	farmer	no		no														No														no
female	44	suspected SCH		1992	1992	1	Han	primary school and below	married/remarried	1	yes	healthy	in liuyang	spouse	farmer	yes	1993	no														No														yes	6	2011	2
male	65	affective disorder		1995	1995	1	Han	primary school and below	never married					other non-relatives	farmer	yes	1995	no														No														no
male	40	suspected SCH		1997	1998	1	Han	middle school	divorced					parents	farmer	yes	1998	yes	2	1998	1	2010	1									No														yes	1	2010	1
female	64	affective disorder		1996	1996	1	Han	primary school and below	widowed					name	farmer	yes	2000	yes	1	1998	1											No														no
female	61	suspected SCH		1970	1970	1	Han	primary school and below	married/remarried	1	yes	disabled	in liuyang	spouse	farmer	no		no														No														no
male	41	suspected SCH		2000	2000	1	Han	middle school	never married					self	farmer	yes	2000	no														No														no
female	43	other disorder	no	1987	1989	1	Han	primary school and below	married/remarried	2	no	healthy	in liuyang	spouse	farmer	no		yes	1	2005	1											No														no
male	36	paranoid disorder	no	1991	1992	1	Han	primary school and below	never married					parents	farmer			no														No														yes	1	2001	1
female	44	SCH	yes	2011	2011	1	Han	middle school	live together		yes	healthy	in liuyang	spouse	farmer			yes	1	2011	1											No														no
male	46	SCH	yes	1984	1985	1	Han	middle school	live together		yes	healthy	in liuyang	spouse	farmer	yes	1984	no														No														yes	1	1984	1
male	52	SCH	yes	2001	2002	1	Han	primary school and below	never married						farmer	yes	2008	yes	1													No														no
male	56	SCH	yes	1987	1988	1	Han	primary school and below	live together		yes	healthy	in liuyang	spouse	farmer	yes	1987	no														Yes	1	2000	1											yes	1	2001	1
female	22	other disorder	no	2005	2007	1	Han	primary school and below	live together		yes	healthy	in liuyang	spouse	farmer	yes	2007	no														No														no
female	59	SCH		2003	2004	1	Han	primary school and below	live together		yes	healthy	in liuyang	spouse	farmer	yes	2004	yes	1	2009	1											No														yes	2	2008	1
female	40	SCH	yes	2009	2010	1	Han	middle school	live together		yes	healthy	in liuyang		farmer	yes	2009	yes	1	2011	1											Yes	1	2010	1											yes	1	2011	1
male	64	SCH	yes	1972	1972	1	Han	middle school	live together		yes	healthy	in liuyang	spouse	farmer	yes	1973	yes	20	1978	3	1990	8	2010	9							Yes	3	1979	1	1982	1	1985	1							yes	2	1982	1
female	29	SCH	yes	1998	1998	1	Han	primary school and below	married/remarried		yes		in liuyang	spouse	farmer	yes	1998	yes	2	2010	1	2011	1									No														no
male	32	SCH	yes	1997	1997	1	Han	middle school	married/remarried		yes	disabled	in hunan	relatives	farmer	no		no														No														no
male	5	epileptic disorder	no	1980	1980	1	Han	middle school	married/remarried		yes	healthy	in liuyang	self			1980	yes	1	2010	1											No														no
male	31	SCH	yes	2001	2001	1	Han	middle school	never married					self	nonfarmer	yes	2003	yes	1	2008	1											No														no
female	26	epileptic disorder	no	2000	2000	1	Han	middle school	married/remarried		yes	healthy	in liuyang	self	nonfarmer	no		yes	1	2000	1											No														no
male	38	SCH	yes	1994	2001	1	Han	primary school and below	never married					parents	farmer	yes		yes	1	2001	1											No														no
female	47	SCH	yes	1994	1994	1	Han	primary school and below	married/remarried		yes	healthy	in liuyang	spouse	farmer	yes	1996	yes	1	1996	1											No														no
male	55	SCH	yes	1978	1980	1	Han	primary school and below	divorced					name	farmer	no		yes	1	1986	1											No														no
female	43	SCH		1995	2005	1	Han	middle school	divorced					parents	farmer	no		yes	2	1995	1	1996	1									No														no
female	25	SCH		2004	2006	1	Han	junior college	married/remarried		yes	healthy	in liuyang	parents	nonfarmer	yes	2005	yes	1	2006	1											No														no
female	42	SCH	yes	1994		1	Han	primary school and below	married/remarried	1	yes	healthy	in liuyang	spouse	farmer	yes		no														No														no
male	43	SCH	yes	2009		1	Han	primary school and below	married/remarried	1	yes	healthy	in liuyang	spouse	farmer	yes		no														No														no
male	47	SCH	yes	1975		1	Han	primary school and below	never married					parents	farmer	yes		no														No														no
male	31	SCH	yes	2003		1	Han	primary school and below						parents	farmer	yes	2003	no														No														no
male	46	SCH	yes	1987		1	Han	primary school and below	never married					siblings	farmer	yes		no														No														no
female	41	SCH	yes	1998	1998	1	Han	primary school and below	married/remarried			healthy	in liuyang	name	farmer	no		no														No														no
male	33	affective disorder	no	2003	2003	1	Han	middle school	married/remarried		yes	healthy	in liuyang	parents	farmer	no		no														No														no
female	44	mental retardation				1	Han	primary school and below	widowed						farmer	yes		no														No														no
male	34	SCH	yes	2008	2008	1	Han	middle school	married/remarried		yes	healthy	in liuyang	spouse	farmer	no		no														No														no
male	33	SCH	yes	2005	2005	1	Han	middle school	married/remarried		yes	healthy	outside hunan	parents	farmer	no		no														No														no
male	43	SCH	yes	1993	1993	1	Han	primary school and below	married/remarried	1	yes	healthy	in liuyang	parents	farmer	no		no														No														no
female	27	affective disorder	no	2010	2010	1	Han	high school	married/remarried		yes	healthy	in hunan	spouse	nonfarmer	no		no														No														no
female	43	SCH	yes	1990	1990	1	Han	primary school and below	married/remarried		yes	healthy	in liuyang	spouse	farmer	no		no														No														no
male	45	SCH	yes	1989		1	Han	middle school	never married					parents	farmer	no		no														No														no
female	63	other disorder	no	1980	1980	1	Han	primary school and below	married/remarried		yes	healthy	in liuyang	spouse	farmer	no		no														No														no
male	44	SCH	yes	1996	1996	1	Han	high school				healthy	in liuyang	spouse	farmer	no		no														No														no
female	45	SCH	yes	1990		1	Han	middle school	married/remarried		yes	healthy	in liuyang	spouse	farmer	yes
female	47	SCH	yes	1997	1997	1	Han	primary school and below	married/remarried		yes	healthy	in liuyang	spouse	farmer	no		no														No														no
female	41	SCH	yes	1990	1990	1	Han	middle school	married/remarried		yes	healthy	in liuyang	spouse	farmer	yes	2001	no														No														no
female	67	SCH		1988	1988	1	Han	primary school and below	widowed					children		no		no														No														no
male	39	SCH		2005	2005	1	Han	middle school	married/remarried	1	yes	healthy	in liuyang	spouse	farmer	no		no														No														no
male	43	SCH		2002	2002	1	Han	middle school	married/remarried	1	yes	healthy	in liuyang	spouse	farmer			yes	1	2002	1											No														no
male	37	SCH		1997	1997	1	Han	primary school and below	never married					parents	farmer	no		yes	2	1999	1	2001	1									No														no
male	60	SCH				1	Han	primary school and below	married/remarried	1	yes	healthy	in liuyang	spouse	farmer	no		no														No														no
male	38	other disorder		1981	1984	1	Han	primary school and below	never married					parents	farmer	yes		no														No														no
female	44	SCH		1997	1997	1	Han	primary school and below	married/remarried	1	yes	healthy	in liuyang	spouse	farmer	no		yes	3	1997	1	1998	1	1999	1							Yes	1	2007	1											yes	3	1997	1
male	24	epileptic disorder		1988	1988	1	Han	primary school and below	never married					parents	farmer	yes	2000	yes	3	1988	1	2003	1	2004	1							Yes	3	2007	1	2008	1	2009	1							yes	2	2009	1
male	73	SCH		1987	1988	1	Han	primary school and below	married/remarried	2	yes	healthy	in liuyang	children	farmer			yes	2	1988	1	1989	1									No														no
female	34	SCH		2004	2004	1	Han	primary school and below	married/remarried	1	yes	healthy	in liuyang	spouse	farmer	no		no														Yes	1	2004	1											no
female	45	epileptic disorder		1978	1978	1	Han	primary school and below	married/remarried		yes	healthy	in liuyang	spouse	farmer	yes		yes	1	2011	1											No														no
female	24	SCH		1999	1999	1	Han	primary school and below	never married					parents	farmer	yes	1999	yes	2	1999	1	2010	1									No														no
female	33	SCH		2009	2009	1	Han	primary school and below	married/remarried	2	yes	healthy	in liuyang	spouse	farmer	yes	2011	yes	2	2011	2											Yes	1	2012	1											yes	3	2010	1
female	42	epileptic disorder		1986	1986	1	Han	primary school and below	married/remarried		yes	disabled	in liuyang	spouse	farmer	yes	2012	yes	2	2003	1	2008	1									No														yes	5	2002	3
male	57	SCH		2005	2005	1	Han	primary school and below	married/remarried		no	disabled	in liuyang	siblings	farmer	no		no														No														no
female	43	SCH	yes	1991	1991	1	Han		married/remarried	1	yes	healthy	in liuyang	spouse	farmer	yes	1991	yes	1	1991	1											Yes	1	1991	1											yes	3	1991	1
female	55	SCH	yes	2001	2001	1	Han	primary school and below	married/remarried	1	yes	healthy	in liuyang	spouse	farmer	yes	2001	no														No														no
female	40	SCH	yes	2004	2004		Han	primary school and below	divorced					parents	farmer	yes	2004	yes	3	2004	1	2009	1	2011	1							No														yes	5	2005	1
male	25	SCH	yes	2007	2007	1	Han	primary school and below	never married					parents	farmer	yes	1999	no														No														no
female	24	SCH	yes	2005	2006	1	Han	primary school and below	married/remarried	1	yes	healthy	in liuyang	parents	farmer	yes	2006	yes		2006	1	2011	2									No														no
male	39	SCH	yes	2005	2005	1	Han	primary school and below	divorced					parents		yes	2005	yes	2	2007	1	2010	1																							no
female	66	SCH	yes	2007	2007	1	Han	primary school and below	married/remarried	1	yes		in liuyang	children				no														No														yes	2	2007	1
female	50	SCH	yes	2007	2007	1	Han	primary school and below	married/remarried	1	yes	healthy	in liuyang	spouse	farmer			no														Yes	1	2007	1											no
female	45	SCH	yes	2008	2008		Han	middle school	married/remarried	1	yes	healthy	in liuyang	spouse		yes	2008	yes	3	2008	2	2009	1									No														yes		2008	1
female	67	SCH	yes	2007	2007	1	Han	primary school and below	married/remarried	1	yes	healthy	in liuyang	spouse	farmer	yes	2007	no														No														yes	1	2007	1
male	50	SCH	yes	1982	1983	1	Han		married/remarried	1	yes	healthy	in liuyang	spouse	nonfarmer			no														No														no
male	28	SCH	yes	1992	2007	1	Han	primary school and below	never married					parents	farmer	yes	1996	yes	3	2007	2	2008	1									No														no
female	45	SCH	yes	1994	1995	1	Han		married/remarried	1	yes	healthy	in liuyang	spouse		yes	1994															No														yes	6	2006	2
male	43	epileptic disorder	no	1971	1971	1	Han	primary school and below	never married					siblings	farmer	yes	1971	yes	8	1971	1	1972	2	1973	2	1974	2	1980	1			No														no
male	47	epileptic disorder	no	2003	2003	1	Han	middle school	married/remarried	1	yes	healthy	in liuyang	spouse	farmer			yes	1	2007	1											Yes	6	2008	4	2009	2									no
male	12	epileptic disorder	no	2001	2003		Han	primary school and below	never married					parents		yes	2003	yes	6	2001	2	2002	1	2003	2	2004	1					No														yes	12	2006	2
female		SCH	yes	1989		1	Han		married/remarried	1	yes	healthy	in liuyang	name	farmer	yes	1989	yes	3	1998	1	2001	1	2002	1							Yes														yes
female	23	epileptic disorder	no	1998	1998	1	Han	primary school and below	married/remarried	1	yes	disabled	in liuyang	parents	farmer	yes	1998	no														No														no
male	43	epileptic disorder	no	2005	2005	1	Han		married/remarried	2	no	healthy	in liuyang	name	farmer	yes	2010	no														No														no
female	55	SCH	yes	2001	2001	1	Han							spouse	farmer	yes	2011	no														No														yes	2	2008	1
male	27	epileptic disorder	no	2003	2007	1	Han		never married					parents	farmer	yes	2011	yes	4	2007	2	2008	1	2011	1							No														no
male	47	SCH	yes	1986	1990	1	Han	high school	never married						nonfarmer	yes	1986	yes	1	2009	1											No														yes	10	1986	3
female	30	epileptic disorder		2001	2007	1	Han	middle school	married/remarried	1	yes	disabled	in liuyang	self	farmer	no		no														No														no
male	48		yes	2003	2003	1	Han	middle school	married/remarried	1	yes	healthy	in liuyang	spouse	farmer	no		no														No														no
male	31		yes	2006	2006	1	Han	middle school	divorced		yes	healthy	in liuyang	parents	nonfarmer	yes	2006	yes	1	2006	1											No														no
female	29	epileptic disorder		2000	2000	1	Han	middle school	married/remarried	1	yes	healthy	in liuyang	self	farmer	no		no														No														no
male	28	epileptic disorder		1987	1987	1	Han	middle school	never married					parents	farmer	no		no														No														no
female	27		yes	1998	1999	1	Han	middle school	divorced					parents	nonfarmer	yes	1999	yes	1	2005	1											No														no
male	58		yes	1986	1986	1	Han	middle school	married/remarried	1	yes	healthy	in liuyang		farmer	no		yes	1	1986	1
female	48		yes	1996	1996	1	Han	middle school	married/remarried	1	yes	healthy	in liuyang	spouse	farmer	no		yes	2	1996	1											No														no
female	29	affective disorder		2002	2002	1	Han	middle school	married/remarried	1	yes	healthy	in liuyang	parents	farmer	no		no														No														no
male	50		yes	1985	1985	1	Han	middle school	divorced					parents	farmer	yes		yes	6	1985	2	1997	2	2002	1	2004	1					No														no
male	30		yes	2001	2001	1	Han	middle school	married/remarried	1	yes	healthy	in liuyang	self	farmer	no		no														No														no
male	37		yes	1993	1993	1	Han		married/remarried	1	yes	healthy	in liuyang	parents	farmer	yes	2001	yes	3	1993	2	2004	1									No														no
male	33		yes	2002	2002	1	Han	middle school	never married					parents	farmer	no		no														No														no
male	42	suspected SCH		1998	2003	1	Han	primary school and below	never married					siblings	farmer	no		yes	1	2003	1											No														no
male	47	SCH		1992	1992	1	Han	middle school	never married					parents	farmer	yes		yes	2	1992	1	2010	1									No
male	37	suspected SCH		2011	2011	1	Han	primary school and below	never married					parents	farmer	no		no														Yes	1	2011	1											yes	1	2011	1
female	39	SCH		1992	1992	1	Han	primary school and below	married/remarried	1	yes	healthy	in liuyang	spouse	farmer	no		yes	1	2010	1											No														yes	2	2009	1
female	48	suspected SCH		2006	2006	1	Han	primary school and below	married/remarried	1	yes	disabled	in liuyang	spouse	farmer	no		no														No														yes	1	2005	1
female	32	suspected SCH		2000	2000	1	Han	primary school and below	married/remarried	1			outside hunan	spouse	farmer	no		no														No														no
female	45	SCH		1987	1987	1	Han				yes	healthy	in liuyang	spouse	farmer			yes	2	2010	1	2011	1									No														no
male	51	other disorder		1994	1994	1	Han	high school	married/remarried	1	yes	healthy	in liuyang	relatives	farmer	yes		yes	1	1994	1											No	199													no
male	37	suspected SCH		2004	2005	1	Han	primary school and below	divorced					parents	farmer	yes	2005	yes	1	2005	1											No														no
female	27		yes	2003	2004	1	Han	middle school	never married					parents		yes	2003	yes	2	2007	1	2008	1									No														no
female	52		yes	1990	1991	1	Han	primary school and below	married/remarried		yes	healthy	in liuyang	spouse	farmer	yes	1990	no														No														no
male	25		yes	2005	2005	1	Han	middle school	never married					parents	farmer	yes	2005	yes	1	2005	1											No														no
male	46		yes	2006	2007	1	Han	primary school and below	never married					parents	farmer	yes	2006	yes	1	2007	1											No														no
female	55		yes	1997	1998	1	Han	primary school and below	married/remarried		yes	healthy	in liuyang	spouse	farmer	yes	1997	no														No														no
male	34	epileptic disorder		1996	1996	1	Han	middle school	married/remarried		yes	healthy	in liuyang	parents	farmer	no		yes	1	1996	1											No														no
female	27	paranoid disorder	yes	2004	2004	1	Han	middle school	married/remarried		yes	healthy	in liuyang	spouse	farmer	yes	2004	yes	1	2004	1											No														no
female	55		yes	1980	1981	1	Han	primary school and below	widowed					children		yes	1981	no														No														yes	1	2011	1
female	46		yes	2000	2000	1	Han	middle school	married/remarried					name	farmer	yes	2000	no														No														no
female	80		yes	1980	1995	1	Han	primary school and below	widowed					children	farmer	no		no														No														no
female	73		yes	1968	1968	1	Han	primary school and below	widowed					children		yes	1968	yes	2	1986	1	2006	1									No														no
female	42		yes	1999	2001	1	Han	primary school and below	married/remarried		yes	healthy	in liuyang	spouse	farmer	no		no														No														no
female	27		yes	2006	2006	1	Han		divorced					parents		yes	2006	no														No														no
female	25		yes	2009	2009	1	Han	middle school	never married					parents	farmer	yes	2009	yes	1	2009	1											No														no
male	28		yes	2003	2003	1	Han	primary school and below	never married					parents	farmer	no		no														No														no
female	48		yes	1997	1998	1	Han	middle school	married/remarried	1				spouse	farmer	no		no														No														no
female	23		yes	2003	2004	1	Han	middle school	married/remarried	1	yes	healthy	in liuyang	parents	farmer	no		no														No														no
female	59		yes	1998	1998	1	Han	primary school and below	married/remarried	1	yes	healthy	in liuyang	spouse	farmer	no		yes	2	1998	1	1999	1									No														no
female		affective disorder		2000	2002	1	Han	primary school and below	married/remarried	1	yes	healthy	in liuyang	children	farmer	no		no														No														no
male	56		yes	2002	2003	1	Han	primary school and below	married/remarried	1	yes	healthy	in liuyang	spouse	farmer	no		no														No														no
male	24		yes	2006	2007	1	Han	middle school	married/remarried	1	yes	healthy	in liuyang	spouse	nonfarmer	no		no														No														no
female	19		yes	2002	2003	1	Han	high school	never married					parents	farmer	no		no														No														no
female	49		yes	1998	1999	1	Han	middle school	married/remarried	1	yes	healthy	in liuyang	spouse	farmer	no		no														No														no
female	23	epileptic disorder		1998	2000	1	Han	primary school and below	never married					parents	farmer	no		no														No
female	59		yes	1996	1997	1	Han	middle school	married/remarried	1	yes	healthy	in liuyang	spouse	farmer	no		no														No														no
female	61		yes	1998	1999	1	Han	primary school and below	married/remarried	1	yes	healthy	in liuyang	spouse	farmer	no		no														No														no
female	56		yes	1998	1998	1	Han	primary school and below	married/remarried	1	yes	healthy	in liuyang	spouse	farmer	no		no														No														no
female	30		yes	1999	2000	1	Han	middle school	married/remarried	1	yes	healthy	in liuyang	spouse	farmer	no		no														No														no
male	44	epileptic disorder		1997	1999	1	Han	primary school and below	divorced					parents	farmer	no		no														No														no
male	47		yes	2000	2000	1	Han	middle school	widowed					children	farmer	no		no														No														yes	2
female	58	SCH	yes	2002	2002	1	Han	primary school and below	married/remarried		yes	healthy	in liuyang	self	farmer			yes	1	2003	1											No														no
female	43	SCH	yes	2005	2005	1	Han	middle school	married/remarried		yes	healthy	in liuyang	spouse	farmer	no		yes	1	2005	1											No														no
female	64	SCH	yes	1974	1974	1	Han	primary school and below	married/remarried		yes			children	farmer	no		yes	6	1976	1	1977	1	1978	1	1979	1	1982	2			No														yes	5	1976	2
female	39	SCH	yes	2005	2005	1	Han	junior college	married/remarried	1	yes	disabled	in liuyang	spouse	nonfarmer	no		yes	2	2005	1	2009	1									Yes	1	2005	1											no
female	48	SCH	yes	2003	2003	1	Han		married/remarried	2	yes	healthy	in liuyang	spouse	farmer	no		yes	3	2003	1	2004	1	2005	1							No														no
male	43	SCH	yes	1996	1996	1	Han	high school	never married					parents	farmer	no		yes	2	1996	1	2000	1									No														no
female	41	SCH	yes	1990	2006	1	Han	primary school and below	married/remarried		yes	healthy	in liuyang	spouse	farmer	no		yes	2	2006	1	2011	1									No														no
male	38	SCH	yes	2001	2001	1	Han		married/remarried					spouse		no		yes	2	2005	1	2006	1									No														no
female	70	SCH	yes	1996	2009	1	Han	primary school and below	married/remarried	1	yes	healthy	in liuyang	spouse	farmer			no														No														no
male	27	SCH	yes	2002	2002	1	Han	middle school	never married					parents	farmer			yes	2	2003	1	2004	1									No														yes	1	2004	1
male	67	SCH	yes	2010	2009	1	Han	middle school	married/remarried		yes	healthy	in liuyang	self	farmer			yes	1	2010	1											No														no
female	49	SCH	yes	1994	1994	1	Han	middle school	married/remarried	1	yes	healthy	in liuyang	spouse	farmer			yes	4	1994	1	1995	1	1996	1	1997	1					No														yes
female	5	SCH	yes	1985	1985	1	Han	middle school	married/remarried		yes	healthy	in liuyang	spouse	farmer	no		no														No														no
male	29	mental retardation	no	1984	1984	1	Han	primary school and below	never married					parents	farmer			no														No														no
male	49	SCH	yes	2008	2008	1	Han	middle school	married/remarried		yes	healthy	in liuyang	spouse	farmer	no		yes	5	2008	1	2009	2	2011	2							No														no
female	35	SCH		2006	2006	1	Han	middle school	married/remarried		yes	healthy	in liuyang	spouse	farmer			yes	1	2006	1											No														yes	1	2008	1
female	36	SCH		2007	2008	1	Han	primary school and below	married/remarried		yes	healthy	in liuyang	parents	farmer			no														No														no
male	39	SCH	yes	1990	1990	1	Han	primary school and below	never married					parents	farmer	no		yes	3	1990	1	1996	1	2011	1							Yes	1	2011	1											no
female	30	SCH	yes	2002	2002	1	Han	primary school and below	married/remarried	1	yes	healthy	in liuyang	parents	farmer	yes	1994	yes	4	2002	2	2004	1	2006	1							No														no
female	50	SCH		2009	2009	1	Han	primary school and below	married/remarried		yes	healthy	in liuyang	spouse	farmer			no														No														no
female	35	SCH		2009	2009	1	Han	primary school and below	married/remarried		yes	healthy	in liuyang	spouse	farmer	no		yes	1	2010	1											No														no
male	24	SCH	yes	2006	2007	1	Han	middle school	never married					name	farmer	yes	2007	yes	1	2007	1											Yes	2	2007	2											yes	3	2007	2
female	27	epileptic disorder		2009	2009	1	Han	primary school and below	married/remarried		yes	healthy	in liuyang	spouse	farmer			no														No														no
female	55	SCH		2011	2011	1	Han	primary school and below	widowed					children	farmer			no														No														no
male	62	SCH		1992	1992	1	Han	primary school and below	never married					siblings	farmer			no														No														no
female	54	SCH	yes	2004	2004	1	Han	primary school and below	married/remarried	1	yes	healthy	in liuyang	spouse	farmer	no		no														No														yes	3	2006	3
female	65	SCH	yes	1972	2007	1	Han	middle school	married/remarried	1	yes	healthy	in liuyang	spouse		no		yes	42	2009	1	2008	2									No														no
female	24	SCH		2009	2010	1	Han	primary school and below	never married					parents	farmer			yes	3	2010	1	2011	1	2012	1																					yes	3	2010	1
female	53	SCH		2008	2008	1	Han	primary school and below	married/remarried		yes	healthy	in liuyang	spouse	farmer			no														No														no
female	28	SCH		2008	2010	1	Han	primary school and below	married/remarried		yes	healthy	in liuyang	spouse	farmer			yes	1	2010	1											No														yes	1	2010	1
female	56	SCH		2008	2010	1	Han	primary school and below	married/remarried		yes	healthy	in liuyang	spouse	farmer			no														No														no
male	40	mental retardation		2008	2010	1	Han	primary school and below	never married					siblings	farmer			no														No														no
female	23	SCH		2009	2009	1	Han	middle school	never married					parents	farmer			yes	1	2010	1											No														no
female	47	SCH		2007	2007	1	Han	primary school and below	married/remarried		yes	healthy	in liuyang	spouse	farmer			no														No														no
male	35	SCH	yes	1994	1994	1	Han	primary school and below	never married					parents	farmer	yes	1985	yes	2	1994	1	2011	1									No														yes	6	1994	2
male	43	SCH		2009	2009	1	Han	primary school and below	never married					siblings	farmer			yes	1	2009	1											No														no
female	47	SCH	yes	1993	1993	1	Han		married/remarried	1	yes	healthy	in liuyang	spouse	farmer	yes		yes	2	1983	1	1992	1									No														yes	3	1993	2
female	48	SCH	yes	1994	1994	1	Han		married/remarried	1	yes	healthy	in liuyang	spouse	farmer	no		yes	2	1994	2											No														yes	3	1994	2
female	49	SCH		2008	2008	1	Han	primary school and below	married/remarried		yes	healthy	in liuyang	spouse	farmer			no														No														no
female	42	SCH	yes	1989	1989	1	Han	primary school and below	never married					parents	farmer	no		yes	3	1989	2	1993	1									Yes	1	1990	1											no
male	30	SCH		2009	2010	1	Han	primary school and below	never married					parents	farmer			yes	1	2009	1											No														no
male	35	mental retardation		2009	2010	1	Han	primary school and below	never married					parents	farmer			yes	1	2010	1											No														no
male	23	SCH		2008	2009	1	Han	primary school and below	never married					parents	farmer			yes	1	2009	1											No														no
female	42	affective disorder		2007	2010	1	Han	primary school and below	married/remarried		yes	healthy		spouse	farmer			no														No														yes	1	2006	1
female	33	affective disorder		2011	2011	1	Han	primary school and below	married/remarried		yes	healthy	in liuyang	spouse	farmer			no														No														no
female	44	SCH		2006	2010	1	Han		divorced					siblings	farmer			yes	1	2009	1											No														yes	1	2009	1
male	24	SCH	yes	1993	2006	1	Han	primary school and below	never married					parents	farmer	yes		no														No														yes
female	18	mental retardation		2009	2009	1	Han	primary school and below	never married					parents	farmer	yes	2005	yes	1	2009	1											No														no
male	41	SCH	yes	1998	1998	1	Han	primary school and below	never married					parents	farmer	no		no														No														no
female	50	SCH		2003	2003	1	Han	primary school and below	married/remarried	1	yes	healthy	in liuyang	spouse	farmer	yes	2003	no														No														no
male	34	affective disorder		2006	2006	1	Han	primary school and below	never married					parents	farmer	yes	2006	no														No														no
male	32	SCH		2002	2002	1	Han	middle school	married/remarried	1	yes	healthy	in liuyang	parents	farmer	yes	2007	no														No														no
male	32	SCH	yes	2005	2005	1	Han	primary school and below	never married					siblings	farmer	no		no														No														no
female	43	SCH	yes	2001	2001	1	Han	primary school and below	married/remarried	1	yes	healthy	in liuyang	spouse	farmer	yes	2001	yes	1	2001	1											No														no
female	34	affective disorder	no	2000	2000	1	Han	primary school and below	married/remarried	1	yes	healthy	in liuyang	spouse	farmer	no		no														No														no
male	45	affective disorder	no	1987	1987	1	Han	primary school and below	never married					relatives	farmer	yes	1987	no														No														no
female	32			1990	1990	1	Han	primary school and below	married/remarried		yes	healthy	in liuyang	parents	farmer	yes		no														No														no
female	42	affective disorder	no	1990	1990	1	Han	primary school and below	married/remarried		yes	healthy	in liuyang	children	farmer	no		yes	1	1990	1											No														no
female	42	affective disorder		1990	1990	1	Han	middle school	married/remarried		yes	healthy	in liuyang	spouse	farmer	no		no														No														no
female	47	affective disorder	no	1996	1997	1	Han	primary school and below	married/remarried		yes	healthy	in liuyang	spouse	farmer	yes	1997	no														No														no
male	38	affective disorder	no	1994	1995	1	Han	junior college	never married					parents	nonfarmer		1995	yes	3	1995	2	2003	1									No														no
female	66	affective disorder	no	2000	2000	1	Han	primary school and below	married/remarried		yes	healthy	in liuyang	spouse	farmer	no	2000	yes	1	2000	1											No														no
female	63	affective disorder	no	1980	1980	1	Han	primary school and below	married/remarried	1	yes	healthy	in liuyang	spouse	farmer	yes	1987	no	3	2010	1	2009	1	2008	1							No															10	1980	10
male	37	affective disorder	no	2000	2000	1	Han	college and above	never married					parents	farmer	yes	2000	yes	1	2000	1											No														no
female	64	affective disorder	no	1988	1988	1	Han	primary school and below	married/remarried		yes	healthy	in liuyang	spouse	farmer	no		no														No														no
female	48	affective disorder	no	2009	2010	1	Han	primary school and below	never married					parents	farmer	no		no														No														yes	3	2011	3
female	48	affective disorder	no	1990	1990	1	Han	primary school and below	married/remarried		yes	healthy	in liuyang	spouse	farmer	yes	1990	yes	1	2000	1											No														no
male	50	affective disorder	no	2009	2009	1	Han	primary school and below	widowed					parents	farmer	no		yes	2	2009	1	2012	1									No														no
female	78	affective disorder	no	2008	2008	1	Han	primary school and below	married/remarried		yes	healthy	in liuyang	children	farmer	yes	2008	yes	1	2008	1											No														no
male	53	SCH	yes	2000	2000	1	Han	primary school and below	married/remarried		yes	healthy	in liuyang	spouse	farmer	no	2000	yes	1	2000	1											No														no
male	26	affective disorder	no	2006	2006	1	Han	junior college	never married					parents	farmer	no		no														No														no
female	32	affective disorder	no	2006	2006	1	Han	middle school	married/remarried		yes	healthy	in liuyang	spouse	farmer	yes	2006	yes	2	2006	2											No														no
female	53	affective disorder	no	1989	1990	1	Han	primary school and below	married/remarried		yes	healthy	in liuyang	spouse	farmer	yes	1989	yes		1990	1											No														no
male	40	SCH	yes	2006	2006	1	Han	middle school	married/remarried		yes	healthy	in liuyang	spouse	farmer	no		yes	1	2007	1											No														no
male	27	SCH	yes	2000	2000	1	Han	middle school	never married					parents	farmer			yes	1	2000	1											No														no
female	25	SCH	yes	2006	2006	1	Han	high school	never married							yes	2006	yes	2	2006	1	2010	1									No														no
female	38	SCH	yes	1996	1996	1	Han	primary school and below	never married					name	farmer	yes		no														No														no
female	57	SCH	yes	1985	1985	1	Han	primary school and below	married/remarried	1	yes	healthy	in liuyang	spouse	farmer	no		no														No														no
female	30	SCH	yes	2008	2008	1	Han	primary school and below	married/remarried		yes	healthy	in liuyang	name		no		yes	1	2011	1											Yes	3	2009	2	2010	1										3	2009	2
male	43	SCH	yes	2010	2010		Han	middle school			yes	healthy	in hunan		nonfarmer	yes	2011	yes	1	2010	1											No														yes	1
male	66	SCH	yes	1996	1996	1	Han	primary school and below	married/remarried		yes	healthy	in liuyang	spouse	farmer	no		no														No														no
male	33	SCH	yes	2006	2006	1	Han	middle school	married/remarried		yes	healthy	in liuyang	spouse	nonfarmer	no		yes	1	2006	1											No														yes
male	22	SCH	yes	1999	1999	1	Han	primary school and below	never married					parents	farmer	yes	2009	yes		2011	1	2010	1	2008	1	2012	1	2009	1			No														no
male	65	SCH	yes	1965	1990	1	Han	primary school and below	married/remarried		yes	healthy	in liuyang	spouse		yes	1965	no														No														no
female	48	SCH	yes			1	Han	primary school and below	married/remarried		yes	healthy	in liuyang	spouse	farmer	no		yes	1	2010	1											No														yes
female	52	SCH	yes	2001	2001	1	Han	middle school	married/remarried		yes	healthy	in liuyang	spouse	farmer	no		no														No														no
male	62	SCH	yes	1989	1995	1	Han	primary school and below	married/remarried		yes	healthy	in liuyang	spouse	farmer	yes	1995	yes	1	1995	1											No														no
male	44	SCH	yes	1998	2000	1	Han	primary school and below	never married					relatives	nonfarmer	no		no														No														no
female	56	SCH	yes	2007	2008	1	Han	primary school and below	married/remarried		yes	healthy	in liuyang	children	farmer	no		yes		2007	1											No														no
female	61	SCH	yes	1990	1990	1	Han		widowed		yes			children	farmer	yes	1990	yes	3	1990	1	1999	1	2011	1							No														no
male	62	SCH	yes	1990	1990	1	Han	high school	married/remarried		yes	healthy	in liuyang	spouse	farmer	yes	1980	yes	5	1990	1	1995	1									No														yes		2010	3
female	63	SCH	yes	1990	1995	1	Han	primary school and below	married/remarried		yes	healthy	in liuyang	spouse		no		no														No														no
male	40	SCH	yes	2009	2009	1	Han	high school	never married					parents	farmer	no		yes	1	2009	1											No														no
male	44	SCH	yes	2002	2002	1	Han	middle school	married/remarried	1	yes	healthy	in liuyang	spouse	farmer	no		yes	1	2002	1											No														no
female	70	SCH	yes	2010	2011	1	Han	primary school and below	married/remarried	1	yes	healthy	in liuyang	spouse	farmer	no		no														No														no
female	32	suspected SCH	yes	1999	2001	1	Han	middle school	never married					parents	farmer	yes	2000	yes	1	2010	1											Yes	1	2005	1											yes	1	2008	1
female	31	epileptic disorder	no	1984	1984	1	Han	primary school and below	married/remarried	1	yes	healthy	in liuyang	parents	farmer	no		no														No														no
female	60	SCH	yes	1976	1976	1	Han	primary school and below	married/remarried	1	yes	healthy	in liuyang	spouse	farmer	no		yes	2	1976	1	1980	2									No														no
male	40	epileptic disorder	no	1993	1993	1	Han	high school	never married					siblings	farmer	yes	1993	yes	8	1993	1	1994	1	1995	3	1996	4	1997	5	1998	6	No														no
male	24	SCH	yes	2010	2010	1	Han	high school	never married					parents	farmer	no		no														No														no
male	28	mental retardation	no			1	Han	primary school and below	never married					parents	farmer	yes		no														No														no
male	25					1	Han	middle school	never married					parents	farmer			no														No														no
female	44					1	Han	middle school	married/remarried	1	yes	healthy	in liuyang	spouse	farmer	yes		no														No														no
	39					1	Han	primary school and below	never married					siblings	farmer	yes		no														No														no
	30					1	Han	middle school	never married					parents	farmer			no														No														no
female	47					1	Han	primary school and below	married/remarried	1	yes	healthy	in liuyang	spouse	farmer	yes		no														No														no
female	31			2011		1	Han		married/remarried	1	yes	healthy	in liuyang	spouse	farmer	no		no														No														no
female	44					1	Han	middle school	married/remarried	1	yes	healthy	in liuyang	spouse	farmer	yes	2002	no														No														no
male	23			2005	2005	1	Han	high school	never married					parents	farmer	yes	2005	no														No														no
female	75					1	Han	primary school and below	married/remarried	1	yes	healthy	in liuyang	children	farmer	yes		no														No														no
male	29					1	Han	middle school	never married					name	farmer	yes	1999	yes														No														no
female	51					1	Han	primary school and below	married/remarried	1	yes	healthy	in liuyang	spouse	farmer	yes		no														No														no
female	48					1	Han	middle school	married/remarried	1	yes	healthy	in liuyang	spouse	farmer			no														No														no
male	50					1	Han	primary school and below	never married					siblings				no														No														no
male	38					1	Han		never married					name	farmer	yes		no														No														no
male	43	SCH	yes	1986	1986	1	Han	primary school and below	never married					parents	farmer	no		yes	2	1986	1	1990	1									No														no
male	71	SCH	yes	2000	2000	1	Han		married/remarried	1	yes	healthy	in liuyang	spouse	farmer	no		no														No														yes	1	2006	1
	23	affective disorder	no	2011	2011	1	Han	high school	divorced					self	farmer	no		yes	1	2010	1											Yes	1	2010	1											yes	3	2011	3
female	21	affective disorder	no	2008	2011	1	Han	junior college	never married					parents		yes	2008	yes	3	2010	1	2011	2									Yes	1	2010	1											yes	1	2011	1
male	65			1977	1977	1	Han	primary school and below	divorced					self		yes	1977	no														Yes	1	1977	1											no
male	46	SCH	yes	1984	1984	1	Han	middle school	married/remarried	1	yes	healthy	in liuyang	spouse	farmer	no		yes	3	1984	1	2010	2									No														no
female	30	SCH	yes	2003	2003	1	Han	junior college	never married					parents		no		yes	3	2003	1	2006	1	2010	1							No														no
male	32	SCH	yes	2002	2002	1	Han	middle school	never married					parents	farmer	no		yes		2010	1											Yes		2010	1											yes	13	2004	1
female	15	SCH		2007	2008	1	Han	primary school and below	never married					parents	farmer	yes	2008	yes	1	2008	1											Yes	2	2008	1	2009	1									no
female	57	SCH		1983	1984	1	Han	primary school and below	married/remarried		yes	healthy	in liuyang	spouse	farmer			no														No														no
female	27	SCH		1998	1999	1	Han	primary school and below	married/remarried		yes	healthy	in liuyang	spouse	farmer			no														No														yes	1	2010	1
female	48	epileptic disorder		2004	2010	1	Han	primary school and below	married/remarried		yes	disabled	in liuyang	spouse	farmer			yes	40	2004	8	2005	32									No														no
male	35	SCH		1991	1991	1	Han	middle school	never married					parents	nonfarmer			yes	1	1992	1											No														no
female	29	other disorder		2005	2005	1	Han	middle school	divorced					parents				no														No														no
female	70	SCH		1992	1992	1	Han	primary school and below	married/remarried		yes	healthy	in liuyang	name	farmer			no														No														no
female	35	SCH	no	2006	2008	1	Han	primary school and below						spouse	farmer	no		no														No														no
male	71	SCH	no	2007	2008	1	Han		married/remarried		yes	healthy	in liuyang	children	farmer	no		no														No														no
female	37	SCH	no	2009	2011	1	Han		married/remarried		yes	healthy	in liuyang	spouse	farmer	no		no														No														no
female		SCH	yes	2001	2011	1	Han	primary school and below	married/remarried	1	yes	healthy	in liuyang	spouse	farmer	no		no														No														no
male	38	SCH	yes	1995	1996	1	Han	middle school	never married					parents	farmer	no		yes	1	1996	1											No														yes	8	2011	2
female	46	SCH	yes	1992	1993	1	Han	primary school and below	married/remarried	1	yes	healthy	in liuyang	spouse	farmer	no		no														No														yes	1	1997	1
female	62	SCH	yes	2005	2008	1	Han	primary school and below	live together		yes	healthy	in liuyang	spouse	farmer	yes	2005	yes	6	2005	1	2006	1	2007	1	2008	1	2009	1	2010	1	No														no
female	29	SCH	yes	2005	2005	1	Han	middle school	live together		yes	healthy	in liuyang	parents	farmer	yes	2005	yes	1	2005	1											No														no
female	40	SCH	yes	1992	1992	1	Han	middle school			yes	healthy	in liuyang	spouse				yes		1997	2	1999	2	2001	1	2005	1	2006	1			No														yes		1997	2
male	47	SCH	yes	2010	2010	1	Han	primary school and below			yes	healthy	in liuyang	spouse	farmer			yes		2010	1	2011	1									No														no
female	49	SCH	yes	2004	2005	1	Han				yes	healthy	in liuyang	spouse	farmer			yes		2004	1											Yes		2006	1											yes		2004	2
female	26	SCH	yes	2010	2010	1	Han	middle school			yes	healthy	in liuyang	spouse	farmer	yes	2011	yes		2010	1											No														no
female	42	SCH	yes	1994	1995	1	Han	middle school			yes	healthy	in liuyang	spouse	farmer			yes		1995	1	2003	1	2006	1							No														yes		1995	2
female	48	SCH	yes	2008	2008	1	Han				yes	healthy	in liuyang	spouse	farmer			yes		2009	1	2010	1									No														yes		2009	1
male	40	SCH	yes	1988	1988	1	Han	middle school	never married					parents	farmer			yes		1998	1	1999	1	2002	1	2004	1					Yes		2000	1											yes		1999	2
female	42	SCH	yes	1994	1994	1	Han	primary school and below						parents				yes		1994	1	1996	1									No														yes		1996	1
female	53	SCH	yes	1996	1998	1	Han	primary school and below			yes	healthy	in liuyang	spouse	farmer	yes	1998	yes		1998	1	2001	1	2004	1							No														yes		1998	2
male	38	SCH	yes	1998	1998	1	Han	primary school and below	never married					parents	farmer			yes		2001	2											Yes		2007	1											yes		1999	2
male	23	SCH	yes	2005	2005	1	Han		never married					relatives	nonfarmer			yes		2005	1	2007	1									No														yes		2005	1
female	58	SCH	yes	1993	1993	1	Han	primary school and below			yes	healthy	in liuyang					yes		1993	1											No														yes		1993	2
female	71	SCH	yes	1998	1999	1	Han		widowed				in liuyang	children	farmer			yes		2011	1											No														no
female	32	SCH	yes	2001	2003	1	Han				yes	healthy	in liuyang	spouse	farmer			yes		2003	2	2004	1	2005	1							Yes		2004	1											yes		2003	1
male	36	SCH	yes	1994	1995	1	Han		never married									yes		1994	1	1995	1	2003	2							Yes		2003	1											yes		1994	2
female	27	SCH	yes	2003	2004	1	Han	high school	never married					parents		yes	2003	yes	4	2004	2	2005	1	2007	1																					yes		2004	1
female	40	SCH	yes	2001	2002	1	Han					healthy	in liuyang	spouse				yes		2002	1	2004	1	2005	1							No														yes		2004	1
female	55	SCH	yes	1990	1994	1	Han		widowed		yes		in liuyang	children	farmer			no														No														yes		1996	2
female	19	SCH	yes	2009	2009	1	Han	middle school	never married						farmer			yes		2010	1											No														no
female	31	SCH	yes	2001	2001	1	Han	middle school	never married					parents	farmer	no		yes	3	2001	1	2004	1	2009	1							No														no
male	32	SCH	yes	2004	2004	1	Han	primary school and below	never married					parents	farmer	no		yes	4	2004	1	2005	1	2007	1	2009	1					No														yes	4	2004	1
female	60	SCH	yes	1985	1985	1	Han	primary school and below	married/remarried		yes	healthy	in liuyang	spouse	farmer	no		yes	3	1985	1	1987	1	1994	1							No														no
male	69	affective disorder	yes	1998	2012	1	Han	primary school and below	married/remarried		yes	healthy	in liuyang	spouse	farmer	no		no														No														no
female	55	SCH	yes	1994	1995	1	Han	primary school and below	married/remarried		yes	healthy	in liuyang	children	farmer	no		yes														No														yes
female	46	SCH	yes	1992	1992	1	Han	primary school and below	married/remarried		yes	healthy	in liuyang	spouse	farmer	no		yes														No														no
male	38	mental retardation				1	Han	primary school and below	never married					parents	farmer			no														No														yes	2	2009	2
male	28	suspected SCH		1996	1999	1	Han	middle school	never married					parents	farmer	yes	2001	yes	1	2001	1											No														no
male	39	SCH		2008	2009	1	Han	primary school and below	never married					parents	farmer	yes	2008	yes	1	2008	1											No														yes	2	2008	2
female	46	affective disorder		1988	1988	1	Han	primary school and below	widowed					parents	farmer	yes	1989	no														No														no
female	35	mental retardation				1	Han	primary school and below	married/remarried		yes	healthy	in liuyang	parents	farmer			no														No														no
female	50	SCH		1999	1999	1	Han	primary school and below	married/remarried			healthy	in liuyang	spouse	farmer	no		no														No														yes	3	1999	1
female	26	SCH		2004	2004	1	Han	primary school and below	married/remarried		yes	healthy	in liuyang	parents		yes	2006	yes	1	2011	1											Yes	1	2011	1											yes	1	2009	1
female	55	suspected SCH				1	Han	primary school and below	married/remarried		no	healthy	in liuyang	spouse	farmer			no														No														no
male	50		yes	1985	1985	1	Han	high school						spouse	farmer	yes	2008	no														No														yes
male	32		yes	2006	2012	1	Han	middle school	never married					parents	farmer	yes	2006	yes	1	2012												No														yes	6	2009	2
male	49		yes	2000	2000	1	Han		divorced					parents		yes	2009	yes	1	2011	1											No														no
female	38	affective disorder		2000	2007	1	Han	middle school						spouse	farmer	no		yes	1	2007	1											No														no
male	30		yes	2000	2004	1	Han	middle school						spouse	farmer	no		yes	5	2010	1	2009	1	2008	1	2007	1					No														yes	6	2010	3
female	25		yes	2003	2003	1	Han	primary school and below						parents		yes	2003	no														No														yes	8	2011	2
male	49		yes	2002	2002	1	Han	primary school and below						children	farmer	yes	2009	yes	3	2009	1	2010	1	2011	1							Yes	2	2010	1	2011	1									no
female	67		yes	1995	1995	1	Han	primary school and below	widowed					children		yes	1995	no														No														yes
female	32		yes	1998	1998	1	Han	primary school and below	married/remarried		yes	healthy		name	nonfarmer	no		yes	1	2007	1											No														no
female	58		yes	1980	1980	1	Han	primary school and below						children		yes	1980	yes	2	2010	1	2011	1									No														no
male	26	affective disorder		2004	2004	1	Han	middle school	never married					parents		yes	2004	no														No														no
female	25	affective disorder		2006	2006	1	Han	high school						self		no		no														No														no
female	44	epileptic disorder		1998	1998	1	Han	middle school	married/remarried		yes	healthy	in liuyang	spouse	farmer			yes	4	1998	2	1999	2									No														no
male	42	affective disorder		1980	1980	1	Han		never married					parents	farmer	yes	2010	yes	2	1980	2											No														no
male	40	SCH		1996	1996	1	Han	middle school	married/remarried		yes	healthy	in liuyang	spouse	farmer	no		yes	7	1996	2	1997	1	1999	2							No														yes	5	1996	3
female	37	SCH		1995	1995	1	Han	primary school and below	married/remarried		yes	healthy	in liuyang	spouse	farmer	no		yes	1	1995	1											No														no
male	42	SCH		1996	1996	1	Han	middle school	married/remarried		yes	healthy	in liuyang	spouse	farmer	yes	2000	yes	2	1996	1	1998	1									No														yes	1	1997	1
female	47	epileptic disorder		1984	1984	1	Han	primary school and below	married/remarried		yes	healthy	in liuyang	spouse	farmer	yes	1990	yes	7	1984	3	1986	2	1991	2							No														no
female	41	epileptic disorder		2000	2000	1	Han	primary school and below	married/remarried		yes	healthy	in liuyang	spouse	farmer	no		no														No														no
male	45	SCH		1975	1975	1	Han	primary school and below	never married					siblings	farmer			yes	5	1975	2	1977	1	1978	2							No														no
male	44	SCH		1996	1996	1	Han		married/remarried		yes	healthy	in liuyang	spouse	nonfarmer	no		yes	3	1997	1	1999	1	2001	1							No														yes	4	1997	2
male	47	SCH		1992	1992	1	Han	middle school	married/remarried		yes	healthy	in liuyang	spouse	farmer	no		yes	2	1992	1	1993	1									No														yes	1	1993	1
female	36	SCH		1991	1991	1	Han	primary school and below	divorced					siblings	farmer	yes		yes	7	1991	3	1993	1	1995	2							No														yes	5	1991	2
female	24	SCH		2006	2006	1	Han	middle school	never married					parents	farmer	yes		yes	1	2006	1											No														yes	2	2006	1
male	51	epileptic disorder		1962	1962	1	Han	middle school	never married					parents		yes	1974	yes	10	1965	3	1977	2									No														yes	20	1963	7
male	49	SCH		1992	1992	1	Han	primary school and below	divorced					children	farmer			yes	3	1992	1	1993	2									No														yes	4	1992	3
female	42	epileptic disorder		1991	1991	1	Han	middle school	married/remarried		yes	healthy	in liuyang		farmer	no		yes	4	1991	2	1992	1									No														no
female	26	SCH		2009	2009	1	Han	middle school	married/remarried		yes	healthy	in liuyang	spouse	farmer			yes	1	2009	1											No														no
male	28	SCH	yes	2011	2012	1	Han	high school	never married					parents	farmer	no		no														No														yes	2	2011	2
male	59	SCH	yes	2007	2998	1	Han	primary school and below	married/remarried	1	yes	disabled	in liuyang	spouse	farmer	no		yes	2	2007	1	2008	1									No														no
female	50	SCH	yes	1990	1991	1	Han	primary school and below	married/remarried	1	yes	healthy	in liuyang	spouse	farmer	no		no														No														no
male	52	paranoid disorder	no	2000	2001	1	Han	primary school and below	married/remarried	1	yes	healthy	in liuyang	spouse	farmer	no		no														No														no
female	66	affective disorder	no	1995	1996	1	Han	primary school and below	married/remarried	1	yes	healthy	in liuyang	spouse	farmer	no		no														No														no
male	33	SCH	yes	1997	1998	1	Han	high school	married/remarried	1	yes	healthy	outside hunan	parents	nonfarmer	no		yes	1	2005	0	2006	0	2007	0	2008	0	2009	1	2010	1	No	0													no	0
female	46	affective disorder	no	1997	1998	1	Han	middle school	married/remarried	1	yes	healthy	in liuyang	spouse	farmer	no		no														No														yes	1	2005	1
male	48	SCH	yes	1964	1965	1	Han	primary school and below	never married					parents	farmer	no		no														No														no
female	5	SCH	yes	1998	1999	1	Han	primary school and below	married/remarried	2	no	healthy	in liuyang	spouse	farmer	no		no														No																2005	1
female	25	SCH	yes	2006	2007	1	Han	high school	never married					parents	nonfarmer	no		no														No														no
male	28	epileptic disorder	no	1990	1991	1	Han	primary school and below	never married		no			parents	farmer	no		no	0													No	0													no	0
female	25	SCH	yes	2005	2006	1	Han	high school	never married					parents	farmer	no		yes	3	2007	1	2008	1	2011	1							No														yes	3	2007	1
female	26	SCH	yes	2003	2004	1	Han	high school	never married					parents	farmer	no		yes	2	2006	0	2007	0	2008	0	2009	0	2010	1	2011	1	No														yes	2	2006	0
female	58	SCH	yes	1995	1996	1	Han	primary school and below	married/remarried	2	no	healthy	in liuyang	spouse	farmer	no		no														No														no
female	35	SCH	yes	2006	2006	1	Han	primary school and below	married/remarried		yes	healthy	in liuyang	spouse	farmer	no
male	48	SCH	yes	1989	2001	1	Han	primary school and below	divorced					siblings	farmer	no
female	26	SCH	yes	2005	2005	1	Han	primary school and below	never married					parents	farmer			no														No														no
male	24	epileptic disorder			1996	1	Han	primary school and below	never married					parents	farmer	no		no														No														no
male	40	epileptic disorder		1972	1972	1	Han	primary school and below	never married					parents				no														No														no
male	63					1	Han	primary school and below	never married					siblings	farmer			no														No														no
male	43	affective disorder				1	Han	primary school and below	never married
male	40	SCH	yes	2001	2001	1	Han	primary school and below	never married					siblings	farmer			no														No														no
male	19	affective disorder	no	2007	2008	1	Han											yes	2	2009	2
male	26	suspected SCH		2003	2003	1	Han	primary school and below	never married			healthy		siblings				yes	1	2003	1											No														no
male	63	suspected SCH		2005	2005	1	Han	primary school and below	married/remarried			disabled		spouse	nonfarmer			yes	1	2005	1											No														no
male	48	suspected SCH		2000	2000	1	Han		married/remarried		yes	healthy	in liuyang	parents	farmer			yes	1	2001	1											No														no
male	60	SCH		1983	1983	1	Han	primary school and below	married/remarried		yes	healthy	in liuyang		farmer			yes	3	2005	1	2007	1	2008	1																					yes	1
female	64	suspected SCH		1976	1976	1	Han	primary school and below	widowed		yes	healthy		parents	farmer			yes	5	1970	2	1972	1	1982	2							No														no
male	36	suspected SCH		2008	2009	1	Han	middle school	never married			healthy			farmer			yes	2	2011	1	2012	1									No														yes	2	2011	1
	27	suspected SCH		2009	2009	1	Han	middle school	never married			healthy		parents				yes	1	2009	1											No														no
male	22	SCH		2008	2008	1	Han	high school	married/remarried		yes	healthy	in liuyang	spouse	farmer			yes	1	2010		1
male	67	suspected SCH		1982	1983	1	Han		married/remarried	5		disabled		spouse				no														No														no
male	22	suspected SCH		2006	2006	1	Han	middle school			yes	healthy	in liuyang	parents	farmer			yes	1	2006	1											No														no
male	52	suspected SCH		1992	1992	1	Han	primary school and below				healthy		parents	farmer			yes	1	1992	1											No														no
male	27	suspected SCH		2000	2001	1	Han	primary school and below	never married			healthy		parents	nonfarmer	no		yes	5	2011	2	2010	3									No														yes	1
male	37	suspected SCH		2007	2007	1	Han		married/remarried		yes			spouse	farmer			yes	1	2007	1											No														no
female	57	SCH	yes	1981	2012	1	Han	primary school and below	married/remarried		yes	healthy	in liuyang	spouse	farmer	no		no														No														yes	6	2000	3
male	28	SCH	yes			1	Han	high school	never married					parents	farmer	no		yes	3													No														no
female	25	SCH		2005	2005		Han	high school	married/remarried		yes	healthy	in liuyang	parents	farmer	yes	2005	yes	5	2006	1	2007	1	2008	1	2009	1	2011	1			No														no
female	66	SCH		2008	2008	1	Han	primary school and below	married/remarried		yes	healthy	in liuyang	children	farmer	no		no														No														no
female	59	SCH		1992	1992	1	Han	primary school and below	married/remarried		yes	healthy	in liuyang	children	farmer	no		yes	1	1994	1											Yes	1	1994	1											no
male	23		yes	2005	2009	1	Han	primary school and below	never married					parents	farmer	yes	2004	yes	1	2009	1											No														no
female	65	SCH		2010	2010	1	Han	primary school and below	married/remarried		yes	healthy	in liuyang	spouse	farmer			yes	1	2010	1											No														no
female	42	SCH		2011	2011	1	Han	primary school and below	married/remarried		yes	healthy	in liuyang	spouse	farmer	no		no														No														no
female	45		yes	2005	2005	1	Han	primary school and below	married/remarried	1	yes	healthy	in liuyang	spouse	farmer	yes	2005	yes	2	2005	1	2006	1									No														no
male	27		yes	2006	2006	1	Han	primary school and below	never married					parents	farmer	yes	2006	yes	1	2006	1											No														no
female	57	SCH		2000	2000	1	Han	primary school and below	married/remarried					spouse	farmer	no		no														No														no
female	36		yes	2002	2002	1	Han	primary school and below	married/remarried	1	yes	healthy	in liuyang	spouse	farmer	yes	2002	yes	1	2002	1											No														no
male	24	SCH		2010	2010	1	Han	middle school	never married					parents	farmer	no		yes	1	2010	1											No														no
male	38	SCH		2008	2008	1	Han	primary school and below	never married					parents	farmer	yes		no														No														no
male	47	SCH		2007	2010	1	Han	primary school and below	never married					parents	farmer	yes	2007	no														No														no
male	26	SCH		2011	2011		Han	middle school	never married					parents	farmer	no		yes	2	2011	1	2012	1									No														no
female	44		yes	1987	2001	1	Han	primary school and below	married/remarried	1	yes	healthy	in liuyang	spouse	farmer	yes	2001	yes	6	2001	1	2002	1	2010	2							No														no
male	57	SCH		2010	2010	1	Han	primary school and below	never married					parents	farmer	no		no														No														no
female	32	SCH	yes	2001	2001	1	Han	primary school and below	married/remarried	1	yes	healthy	in liuyang	spouse	farmer	yes	2001	yes	1	2001	1											No														no
female	36		yes	1985	2000	1	Han	primary school and below	married/remarried	1	yes	healthy	in liuyang	spouse	farmer	yes	1988	yes	1	2000	1											No														no
male	46		yes	1995	2000	1	Han	primary school and below	married/remarried	1	yes	healthy	in liuyang	spouse	farmer	yes	1995	yes	1	2000	1											No														no
female	56		yes	1988	1988	1	Han	primary school and below	married/remarried	1	yes	healthy	in liuyang	children	farmer	yes	1988	yes	1	1988	1											No														no
female	36		yes	1976	1976	1	Han	primary school and below	never married					parents	farmer	yes	1976	no														No														no
male	24		yes	2007	2007	1	Han	primary school and below	never married					relatives	farmer	yes	2007	yes	1	2007	1											No														no
male	33		yes	1978	1978	1	Han	primary school and below	never married					siblings	farmer	yes	1988	no														No														yes	1	2008	1
female	50		yes	1982	1982	1	Han	primary school and below	married/remarried	1	yes	healthy	in liuyang	spouse	farmer	yes	1982	yes	1	1998	1											No														no
female	48		yes	1998	1998	1	Han	primary school and below	married/remarried	1	yes	healthy	in liuyang	spouse	farmer	yes	1998	yes	1													No														no
female	39	SCH		2005	2005	1	Han	primary school and below	divorced					parents	farmer	yes	2005	yes	3													No														no
male	24		yes	2005	2005	1	Han	primary school and below	never married					relatives	farmer	yes	2005	no														No														no
male	66	SCH		2010	2010	1	Han	middle school	married/remarried		yes	healthy	in liuyang	spouse	farmer	no		no														No														no
female	5	SCH		2005	2005	1	Han	middle school	never married					name	farmer	no		no														No														no
female	24		yes	2009	2009	1	Han	middle school	never married					parents	farmer	yes	2009	yes	2	2009	1	2011	1									No														no
female	19	SCH		2011	2011	1	Han	middle school	never married					parents	farmer	no		no														No														no
female	43		yes	1995	2005	1	Han	primary school and below	married/remarried	1	yes	healthy	in liuyang	spouse	farmer	yes	2005	yes	3	2010	2	2011	1									No														no
male	48	SCH	yes	2005	2005	1	Han	primary school and below	married/remarried		yes	healthy	in liuyang	spouse	farmer	yes	2005	yes	1	2010	1											No														no
female	68		yes	2002	2009	1	Han							children		yes	2007	no														No														no
female	56		yes	2002	2003	1	Han	primary school and below	married/remarried	1	yes	healthy	in liuyang	children	farmer	yes	2000	yes	1	2000	1											No														no
male	27	SCH	yes	2010	2010	1	Han	primary school and below	divorced					parents	farmer	yes	2011	yes	1	2011	1											No														no
female	30	SCH	yes	2006	2006	1	Han		married/remarried		yes	healthy	in liuyang	spouse	nonfarmer	no		yes	1	2011	1											No														no
male	26	SCH	yes	2009	2009	1	Han	middle school	never married					parents	nonfarmer	no		yes	1	2010	1											No														no
female	60			2007	2008	1	Han	primary school and below	married/remarried	1	yes	healthy	in liuyang	spouse	farmer	no		no														No														no
male	39			1996	1996	1	Han	high school	never married					parents	nonfarmer	no		yes	3	1996	1	1998	1	2007	1							No														no
female	37	SCH		2001	2001	1	Han	middle school	married/remarried			healthy	in liuyang	self				yes	4	2001	2	2002	1	2003	1							No														no
female	41	SCH		1998	1998	1	Han		married/remarried			healthy	in liuyang	self	nonfarmer			no														No														no
female	47	SCH		1997	1997	1	Han	primary school and below	married/remarried			healthy	in liuyang	spouse				yes	4	1997	1	2001	1	2007	1	2011	1					No														no
female	40	SCH		1995	1995	1	Han	middle school	never married					parents	nonfarmer			yes	4	1995	1	2000	1	2005	1	2009	1					Yes	2	2005	1	2009	1									yes	3	2005	1
female	28	SCH		2001	2001	1	Han		married/remarried			healthy	in liuyang	spouse	nonfarmer			no														No														no
female	42	epileptic disorder		2003	2003	1	Han	primary school and below	married/remarried			healthy	in liuyang	spouse	nonfarmer			yes	3	2003	1	2007	1	2010	1							No														no
female	58	SCH		1996	2001	1	Han		married/remarried			healthy	in liuyang	self	nonfarmer			no														No														no
female	56	SCH		1992	1992	1	Han	middle school	married/remarried			healthy	in liuyang	spouse	nonfarmer			yes	5	1993	1	1994	1	1995	1	1998	1	2002	1			No														no
male	39	SCH		2004	2004	1	Han	primary school and below	married/remarried			healthy	in hunan	spouse	farmer			yes	3	2004	1	2006	1	2008	1							No	0													no	0
male	35	SCH		1997	2004	1	Han	middle school	never married					parents	farmer			yes	3	2004	1	2007	1	2010	1							No														yes	3	2004	1
male	31	SCH		2006	2010	1	Han	middle school	never married					parents	farmer			yes	1	2011	1											Yes	3	2006	1	2007	1	2010	1							yes	4	2008	1
female	55	SCH		1984	1984	1	Han	primary school and below	married/remarried			healthy	in liuyang	self	nonfarmer			yes	2	2000	1	2004	1									No	2													no
male	21	SCH		2008	2008	1	Han	high school	never married					parents	nonfarmer			yes	2	2008	1	2009	1									No														no
female	28	SCH		2002	2002	1	Han	high school	married/remarried			healthy	in liuyang	parents	nonfarmer			yes	7	2002	1	2003	1	2005	1	2006	1	2009	1	2011	1	Yes	1	2003	1											yes	0
male	36	SCH	yes	1997	1997	1	Han	high school	never married					parents	farmer			yes	7	1997	1	2000	1	2001	2	2002	1	2003	1	2005	1	Yes														yes
female	51	SCH		1998	1998	1	Han		married/remarried			healthy	in liuyang	self				yes	2	1998	1	2005	1									No														no
female	42	SCH		2004	2004	1	Han		married/remarried			healthy	in liuyang	self	nonfarmer			yes	4	2004	2	2005	1	2006	1							No														no
male	38	SCH		1997	1998	1	Han		never married					parents	farmer			yes	3	1998	1	2001	1	2005	1							No														yes	6	2002	1
female	34	SCH		1999	2000	1	Han	middle school	married/remarried			healthy	in liuyang	spouse	nonfarmer			yes	4	2000	1	2001	1	2003	1	2006	1					No														no
male	40	SCH		1998	1998	1	Han	primary school and below	never married					parents	farmer			yes	2	1998	1	2005	1									No														yes	3	1998	1
female	34	SCH		1998	1998	1	Han	primary school and below	married/remarried			healthy	in liuyang	self				yes	5	1998	1	2001	1	2004	1	2005	1	2007	1			No														no
male	29	SCH		1985	2006	1	Han	primary school and below	married/remarried		yes	healthy	in liuyang	self	farmer	no		yes	1	1985	1											No														no
male	43	SCH		2002	2002	1	Han	primary school and below	never married					parents	farmer	no		yes	2	2002	1	2010	1									No														no
male	66	SCH		1982	2006	1	Han	primary school and below	married/remarried		yes	healthy	in liuyang	spouse	farmer	no		yes	3	2005	1	2006	1	2008	1							No														no
male	36	SCH		1992	2011	1	Han	high school	divorced					self	farmer	no		no														No														no
male	68	SCH		2002	2006	1	Han	primary school and below	married/remarried		yes	healthy	in liuyang	self	farmer	yes		yes	1	2012	1											No														no
female	43	SCH		1989	2002	1	Han	primary school and below	married/remarried		yes	healthy	in liuyang	name	farmer	no		yes	2	2002	1	2005	1									No														yes	10	2002	10
male	34	SCH		2002	2010	1	Han	primary school and below	never married					self	farmer	no		no														No														no
male	37	SCH		2005	2005	1	Han	primary school and below	married/remarried		yes	healthy		parents	farmer	no		yes	2	2006	1	2008	1									Yes	1	2006	1											no
male	64	other disorder		1986	2006	1	Han	primary school and below	married/remarried		yes	healthy	in liuyang	self	farmer	no		yes	2	2001	1	2003	1									No														no
male	56	SCH		1993	1993	1	Han	middle school	married/remarried		yes	healthy	in liuyang	spouse	farmer	no		yes	3	1993	1	1994	1	1995	1							No														no
male	23	SCH				1	Han	primary school and below	never married					self	farmer			yes	3	2008	1	2009	1	2010	1							No														no
male	62	affective disorder		2010	2010	1	Han	college and above	married/remarried		yes	healthy	in liuyang	self	nonfarmer	no		no														No														no
male	34	SCH		1994	1994	1	Han	primary school and below						self	farmer	no		yes	1	1994	1											No														yes	1	1994	1
male	22	SCH	yes	2007	2008	1	Han	middle school	never married					parents	farmer	yes	2008	yes	1	2010	1											No														no
female	52	SCH	yes	1990	1991	1	Han	primary school and below	married/remarried		yes	disabled	in liuyang	spouse	farmer	yes	1991	yes	2	1990	1	2003	1									No														yes	1	2005	1
female	43	suspected SCH		2004	2004	1	Han	primary school and below	married/remarried		yes	healthy	in liuyang	spouse	farmer	yes		yes	1	2004												No														no
female	38	SCH	yes	2000	2000	1	Han		never married	2	yes	healthy	in liuyang	spouse	farmer	yes	2000	yes	1	2000	1											No														no
male	26	SCH	yes	2009	2009	1	Han	primary school and below	never married					parents				yes	1	2009	1											No														no
male	47	affective disorder		2004	2005	1	Han	primary school and below	married/remarried		yes	healthy	in liuyang	name	farmer	yes	2005	yes		2005	1											No														no
female	35	SCH	yes	1995	1996	1	Han	primary school and below	married/remarried		yes	healthy	in liuyang	spouse	farmer	yes	1996	yes	1	1996	1											No														yes	2	1996	1
female	39	epileptic disorder		1994	1994	1	Han	middle school	married/remarried		yes	healthy	in liuyang	spouse	farmer	yes		yes	2	1994	1	2003	1									No														no
female	39	SCH	yes	2006	2006	1	Han	primary school and below	married/remarried		yes	healthy	in liuyang	spouse	farmer			yes	1	2006	1											No														no
female	74	SCH	yes	2006	2006	1	Han	primary school and below	married/remarried		yes	healthy	in liuyang	children	farmer			no														No														no
male	59	SCH	yes	1995	1995	1	Han	primary school and below	married/remarried		yes	healthy	in liuyang	spouse	farmer	yes		yes	2	1995	1	2004	1									No														no
male	25	SCH	yes	2011	2011	1	Han	high school	never married					parents	farmer			no														No														no
female	46	suspected SCH		1994	1995	1	Han	primary school and below	married/remarried		yes	healthy	in liuyang	spouse	farmer	yes	1995	yes	2	1995	1	2000	1									No														yes
female	27	suspected SCH		2000	2001	1	Han	middle school	never married					siblings	farmer	yes	2000	no														No														no
male	50	SCH	yes	1991	1992	1	Han	primary school and below	divorced					parents	farmer	yes		no														No														no
female	36	SCH	yes	2000	2000	1	Han	primary school and below	married/remarried		yes	healthy	in liuyang	spouse	farmer			no														No														no
male	42	suspected SCH		2000	2000	1	Han	middle school	married/remarried		yes	healthy	in liuyang	spouse	farmer	yes	2001	yes	3	2000	1	2003	1	2007	1							No														no
female	28	SCH	yes	2008	2008	1	Han	middle school	married/remarried	1	yes	healthy	in liuyang	spouse	farmer	yes	2008	yes	1	2008	1											No														no
female	41	SCH	yes	2004	2006	1	Han	primary school and below	married/remarried	1	yes	healthy	in liuyang	self	farmer	no		yes	1	2004	1											No														no
female	55	SCH	yes	2005	2005	1	Han	middle school	married/remarried	1	yes	healthy	in liuyang	spouse	farmer	no		yes	3	2005	1	2010	1	2011	1							Yes	1	2005	1											no
female	30	SCH	yes	2003	2004	1	Han	junior college	married/remarried				in liuyang	name	farmer	yes	2004	yes	2	2004	2											Yes	1	2004	1											no
female	57	SCH	yes	2007	2010	1	Han		married/remarried	1	yes	healthy	in liuyang	spouse		no		yes		2008	1	2009	1	2010	1	2011	1					No														yes	2	2007	1
[truncated: 1,583 more rows]
[truncated: 126 more columns]
